# Supplementary material for: Chemoselective reaction of methoxyaminomethyl BODIPYs with unprotected carbohydrates: a powerful tool for accessing BODIPY neoglycosides
Source: Royal Society of Chemistry journal article supplement (doi:10.1039/d4qo00886c), 2024-01-01
Supplement: d4qo00886c1.pdf [file d4qo00886c1.pdf]

## Chemoselective Reaction of Methoxyaminomethyl BODIPYs with Unprotected Carbohydrates: A Powerful Tool for Accessing BODIPY Neoglycosides

Ana M. Gómez,\*<sup>a</sup> Luis García-Fernández,<sup>b,c</sup> Andrés G. Santana,<sup>a</sup> Clara Uriel,<sup>a</sup> Leire Gartzia-Rivero,<sup>d</sup> Jorge Bañuelos,\*<sup>d</sup> Inmaculada Garcia-Moreno,<sup>e</sup> Lourdes Infantes,<sup>f</sup> María Rosa Aguilar<sup>b,c</sup> and J. Cristobal Lopez\*<sup>a</sup>

<sup>a</sup> Instituto de Química Orgánica General (IQOG-CSIC), Juan de la Cierva 3, 28006 Madrid, Spain

<sup>b</sup> Instituto de Ciencia y Tecnología de Polímeros (ICTP-CSIC), Juan de la Cierva 3, 28006 Madrid, Spain

<sup>c</sup> Centro de Investigación Biomédica en Red de Bioingeniería, Biomateriales y Nanomedicina (CIBER-BBN), Instituto de Salud Carlos III, Monforte de Lemos 3-5, 28029 Madrid, Spain

<sup>d</sup> Departamento de Química Física, Universidad del País Vasco (UPV), Apartado 644, 48080 Bilbao, Spain

<sup>e</sup> Departamento de Química-Física de Materiales, Instituto de Química-Física "Blas Cabrera" (IQF-CSIC), Serrano 119, 28006 Madrid, Spain

<sup>f</sup> Departamento de Cristalografía y Biología Estructural, Instituto de Química-Física "Blas Cabrera (IQF-CSIC), Serrano 119, 28006 Madrid, Spain

### Table of Contents

|                                                                                                                                                                               |         |
|-------------------------------------------------------------------------------------------------------------------------------------------------------------------------------|---------|
| 1. Material and methods.....                                                                                                                                                  | S2-S5   |
| 2. General synthetic methods.....                                                                                                                                             | S5-S6   |
| 3. Compound Characterization and synthetic procedures.....                                                                                                                    | S6-S16  |
| 4. Copies of <sup>1</sup> H, <sup>13</sup> C {1H}, <sup>19</sup> F, <sup>11</sup> B NMR Spectra: Figure S1-S69.....                                                           | S17-S51 |
| 5. Copies of HRMS spectra: Figure S70-S83.....                                                                                                                                | S52-S65 |
| 6. Molecular structure of compound <b>6d</b> : Figure S84. ....                                                                                                               | S66     |
| 7. Absorption and fluorescence spectra of BODIPY glycoconjugates: Figure S85.....                                                                                             | S67     |
| 8. Absorption spectra (scaled by their respective molar absorption coefficients) of the BODIPY glycoconjugates at different dye concentrations in pure water: Figure S86..... | S68     |
| 9. Evolution of the absolute fluorescence quantum yield with the dye concentration in pure water: Figure S87 .....                                                            | S69     |
| 10. Full-size versions of confocal images: Figures S88-S90.....                                                                                                               | S70-S72 |

## 1. Materials and methods

### General information and materials

Most chemicals and solvents were used as received from commercial suppliers. Before use traces of water present in the commercially available methoxyamine hydrochloride were removed by co-evaporation with dry toluene. All synthetic transformations were performed under inert argon in dry flasks with stoppers or septa. Air and/or moisture-sensitive liquids were transferred using syringes or cannulas. Microwave-Assisted reactions were performed in an Anton Paar Monowave 300 instrument at 600 W with full air cooling and stirring on. Thin-layer chromatography (TLC) on Kieselgel 60 F254 plates was used for analysis. TLC spots were visualized by UV light (254 nm) and then by charring after spraying with 20% sulfuric acid in ethanol. Organic solutions were dried with anhydrous MgSO<sub>4</sub> or Na<sub>2</sub>SO<sub>4</sub>. Solvents were evaporated under reduced pressure using a rotary evaporator. Purification by flash column chromatography was performed on silica gel (230-400 mesh, Merck). High-resolution mass spectra were obtained using electrospray ionization (ESI) on a Q-TOF LC/MS instrument. Specific rotations (in deg cm<sup>2</sup> g<sup>-1</sup>) were measured in a 10 cm thermostated quartz cell on a JASCO P2000 polarimeter. The <sup>1</sup>H- and <sup>13</sup>C{<sup>1</sup>H}-NMR spectra were measured on a 300, 400 or 500 MHz and 75, 101, 126 MHz, respectively. Chemical shifts were expressed in parts per million ( $\delta$  scale) and referenced to the residual H signal of the deuterated solvent (CHCl<sub>3</sub>:  $\delta$  7.26 ppm; CH<sub>3</sub>OH:  $\delta$  4.84 ppm). Coupling constants (*J*) are given in Hz. All <sup>13</sup>C-NMR spectra presented are decoupled from protons. Formyl-BODIPYs **8a**,<sup>1</sup> **8b**<sup>2</sup> and **8c**<sup>3</sup> were prepared according to the previously described methods.

**X-ray diffraction.** X-ray data for compound **6d** was collected using a microsource CuK $\alpha$  radiation in a Bruker APEX II diffractometer and a Photon 100 CCD detector at 120K. Data were processed with APEX3,<sup>4</sup> the structure was solved by direct methods using SHELXS program<sup>5</sup> and refined by -matrix least-squared using SHELXL software incorporated in Olex2-1.5.<sup>6</sup> CCDC 2351271 contains the supplementary crystallographic data for compound **6d**. These data can be obtained free of charge from The Cambridge Crystallographic Data Centre via [www.ccdc.cam.ac.uk/structures](http://www.ccdc.cam.ac.uk/structures)

---

<sup>1</sup> L. Jiao, C. Yu, J. Li, Z. Wang, M. Wu and E. Hao "β-Formyl-BODIPYs from the Vilsmeier-Haack Reaction", *J. Org. Chem.* 2009, **74**, 7525–7528.

<sup>2</sup> A. Ramos-Torres, E. Avellanal-Zaballa, A. Prieto-Castañeda, F. García-Garrido, J. Bañuelos, A. R. Agarrabeitia and M. J. Ortiz, FormylBODIPYs by PCC-Promoted Selective Oxidation of  $\alpha$ -methylBODIPYs. Synthetic Versatility and Applications, *Org. Lett.*, 2019, **21**, 4563–4566.

<sup>3</sup> M. del Río, F. Lobo, J. C. López, A. Oliden, J. Bañuelos, I. López-Arbeloa, I. García-Moreno and A. M. Gómez, One-Pot Synthesis of Rotationally Restricted, Conjugatable, BODIPY Derivatives from Phthalides. *J. Org. Chem.* 2017, **82**, 1240-1247.

<sup>4</sup> APEX3 Software; Bruker AXS Inc.: Madison, Wisconsin, USA, 2016.

<sup>5</sup> G. M. Sheldrick, *Acta Crystallogr. C Struct. Chem.* 2015, **71**, 3–8.

<sup>6</sup> O. V. Dolomanov, L. J. Bourhis, R. J. Gildea, J. A. K. Howard and H. Puschmann, OLEX2: A complete structure solution, refinement and analysis program 2009.

**Photophysical measurements.** The dye solutions at different concentrations were prepared by diluting a concentrated stock solution in water (Milli-Q grade). The photophysical properties at different concentrations in aqueous solutions were recorded using quartz cuvettes with the required optical pathlength ( $l$ ) to match the optical densities and minimize the reabsorption/reemission phenomena at each concentration ( $10^{-6}$  M –  $l = 1$  cm,  $10^{-5}$  M –  $l = 0.1$  cm,  $10^{-4}$  M –  $l = 0.01$  cm and  $10^{-6}$  M –  $l = 0.001$  cm). Visible absorption and fluorescence spectra were recorded on an Agilent spectrophotometer (model CARY 7000) and an Edinburgh Instruments spectrofluorometer (model FLSP 920), respectively. The fluorescence spectra were recorded in right-angle for the diluted solutions ( $10^{-6}$  M), whereas for the rest of concentrated solution a front-face configuration to further decrease the reabsorption/reemission phenomena. The relative fluorescence quantum yields ( $\phi$ ) of the diluted solutions ( $10^{-6}$  M) were obtained using Fluorescein (laser grade from Exciton,  $\phi^p = 0.79$  in aqueous 0.1 M NaOH) as reference. For the more concentrated solutions the absolute fluorescence quantum yield was measured using an integrating sphere coupled to the said spectrofluorometer and a cuvette with an optical pathlength of 0.1 cm. In both cases, the fluorescence spectra were corrected to take into account the detector sensibility to the wavelength. Radiative decay curves were registered with the time correlated single-photon counting technique as implemented in the aforementioned spectrofluorometer. Fluorescence emission was monitored at the maximum emission wavelength after excitation by means of a Fianium pulsed laser (time resolution of picoseconds) with tunable wavelength. The fluorescence lifetime ( $\tau$ ) was obtained after the deconvolution of the instrumental response signal from the recorded decay curves by means of an iterative method. The goodness of the exponential fit was controlled by statistical parameters (chi-square and the analysis of the residuals).

## **Biological studies**

### **Cell culture**

Biological studies were conducted on healthy human breast epithelial cells (HMEpiC, Innoprot), human breast adenocarcinoma epithelial cells (MCF-7, ECACC) and human fibroblast (FBH, ATCC). HMEpiC cells were cultured in mammary epithelial cell medium (Innoprot) supplemented with 5 wt% fetal bovine serum (FBS, Sigma), 1 wt% penicillin/streptomycin (Invitrogen), and 1 wt% Mammary Epithelial Cell Growth Supplement (MEpiCGS, Innoprot). MCF-7 and FBH were cultured in Dulbecco modified eagle medium (DMEM, Sigma) supplemented with 10 wt% of fetal bovine serum (FBS, Sigma), 1 wt% penicillin/streptomycin (Invitrogen) and 2 wt% l-glutamine (Invitrogen).

Cells were maintained at 37 °C and 5 % CO<sub>2</sub> in a humidified chamber until reaching confluence prior to experimentation. Cells within passages 4 to 8 were employed in all experiments.

## Toxicity test

HMEpiC and MCF-7 cells were seeded separately in 96-well plates at a density of 100,000 cells/mL and incubated at 37 °C and 5 % CO<sub>2</sub>. After 24 hours, the culture medium was replaced with sequential dilutions of the different BODIPYs in fresh culture medium starting from the maximum concentration at which no aggregates were formed. The cells were subsequently incubated at 37 °C and 5 % CO<sub>2</sub> for an additional 24 hours. Following this incubation period, the culture medium was substituted with phenol red-free culture medium (Sigma Aldrich).

Cell viability was assessed by the addition of Alamar Blue (AB, Invitrogen) at a concentration of 10% (v/v), following ISO 10993-5:2009 guidelines. The cells were then incubated at 37 °C for 4 hours. Subsequently, cell viability was quantified using a plate reader (Biotek Synergy HT spectrophotometer) with laser excitation at 590 nm, and the emitted fluorescence was measured at 530 nm. The percentage of cell viability was determined using the following equation (eqn (1)):

$$\text{Cell viability (5)} = 100 \times \frac{OD_S - OD_B}{OD_C - OD_B}$$

where ODS, ODB, and ODC represent the emitted fluorescence at 530 nm for the sample (S), blank (B, culture medium without cells), and control (C, culture medium without BODIPY), respectively. All experiments were performed with an n=7, and the resulting data were presented as mean values ± standard deviation (SD).

BODIPYs accumulation inside the cell was visualized using epifluorescence microscopy. The cell stain was performed using DAPI (Invitrogen) to stain the nucleus and Alexa Fluor Plus 647 Phalloidin to stain the actin. Epifluorescence images were taken using a Nikon ECLIPSE TE2000-S microscope with a LED light source and using the software NIS ELEMENTS BR (Nikon). BODIPYs were visualized using a green filter (Ex. 465/30; Em. 515/30), actin in red (Ex. 628/40; Em. 692/40) and nucleus in blue (Ex. 387/11; Em. 447/60).

## Acarbose-BODIPY cell internalization

To visualize the internalizations of acarbose-BODIPY a lightning confocal microscopy (LEICA TCS SP8) technique was applied. This technique provides optical sectioning, allowing imaging into thick samples. By using lightning confocal microscopy it is possible to obtain high-quality images and study the spatiotemporal dynamics of biological systems.<sup>[7]</sup> 200 µL of FBH (100,000 cell/mL) were added to a µ-Slide 8 well IbiTreat (Ibidi) culture slide and incubated for 24 hours at 37 °C and 5% CO<sub>2</sub>. After the incubation

---

<sup>7</sup> W. M. Reilly and C. J. Obara, Advances in confocal microscopy and selected applications. *Methods Mol. Biol.* 2021, **2304**, 1–35.

period, the culture medium was replaced by a non-toxic solution of 100  $\mu$ M of acarbose-BODIPY in a fresh medium and incubated again for 24 hours. Cells were fixed by replacing the culture media with a 4% paraformaldehyde solution and culture for 1 hour. The stain of the cell was performed by using MitoTracker Red CMXRos (Molecular Probes) and LysoTracker Red DND-99 (Invitrogen) to stain the mitochondria and the lysosomes respectively, DAPI (Invitrogen) to stain the nucleus and Alexa Fluor Plus 647 Phalloidin to stain the actin. Analysis of the images was performed using LAS X software (Leica)

### Enzyme Kinetic Studies

Kinetic studies were performed at 25 °C in an appropriate buffer (specific conditions depicted below). In a typical assay, the enzyme was incubated with different inhibitor concentrations for up to 5 min before initiating the reaction by the addition of substrate. The initial reaction rate was measured by monitoring the increase in absorbance at 400 nm for five minutes using a JASCO V-730 UV-vis spectrophotometer. IC<sub>50</sub> determinations were performed using 2-chloro-4-nitrophenyl  $\alpha$ -D-maltotrioxide as chromogenic substrate (1 mM). For each inhibitor, a range of four to seven concentrations bracketing the IC<sub>50</sub> value ultimately determined was used. Dose-response plots (% activity vs. log[I]) were constructed to validate the use of a competitive inhibition model. The data were then fit using non-linear regression based on the Hill equation with Quest Graph™ IC<sub>50</sub> Calculator (AAT Bioquest, Inc).

Specific assay conditions for each enzyme:

- *oryzae*  $\alpha$ -amylase (AOA): 20 mM sodium acetate, 1 mM calcium chloride (pH 5.6).
- Human salivary  $\alpha$ -amylase (HSA): 50 mM sodium phosphate, 100 mM sodium chloride (pH 7).

## 2. General Synthetic Procedures

**Procedure I.** *General method for methyloxime formation.* To a mixture of the appropriate aldehyde **8a–c** (1 equiv.) and methoxyamine hydrochloride (3 equiv.) in anhydrous methanol (5 mL/mmol) and under an argon atmosphere, dry pyridine (4.5 equiv.) was added. The reaction mixture was stirred at room temperature until complete consumption of the starting material was observed by TLC (30 min). The solution was concentrated and the crude material was purified through silica column chromatography (hexane–ethyl acetate 95:5).

**Procedure II.** *General method for methoxyamine formation.* NaCNBH<sub>3</sub> (6 equiv.), was added to a cooled solution (15 °C, water bath) of the corresponding methyloxime **9a–c** (1 equiv.) dissolved in glacial AcOH (10 mL/mmol) under an argon atmosphere. The

mixture was stirred until complete consumption of the starting material was observed by TLC (1 h). Then, it was diluted with ethyl acetate and successively washed with water, saturated solution of NaHCO<sub>3</sub> and brine. The organic layer was dried over anhydrous MgSO<sub>4</sub>, filtered and concentrated at reduced pressure. The residue was purified by chromatography on silica gel (hexane–ethyl acetate 9:1 to 8:2).

**Procedure III.** *General method for neoglycosylation reaction.* A mixture of the corresponding methoxyaminomethyl BODIPY **6a–c** or N-cyanoboronated-N-alkoxyamine derivative **6d** (1 equiv.) and D-glucose (3 equiv.) dissolved in DMF/glacial acetic acid (1:1, 10 mL/mmol) was stirred for 20 h at room temperature. After removal of the solvent, the residue was purified by flash chromatography on silica gel (Dichloromethane–methanol 95:5 to 9:1).

**Procedure IV.** *General method for neoglycosylation reaction under microwave irradiation.* To a mixture of the corresponding methoxyaminomethyl BODIPY **6a–c** or N-cyanoboronated-N-alkoxyamine derivative **6d** (1 equiv.) dissolved in methanol/glacial acetic acid (1:1, 10 mL/mmol) in a microwave tube was added the appropriate free sugar (D-glucose, D-cellobiose, D-lactose, D-maltose, D-maltotriose or acarbose, 3 equiv., respectively) and 2-amine-5-methoxy benzoic acid (10% w/w). The tube was then exposed to microwave irradiation at 60 °C until completion of the reaction (1-8 h). The solvents were then evaporated in vacuo and chromatography of the residue on silica gel gave glyco-BODIPYs **10a–c**, **12–16**.

**Procedure V.** *General method for acetylation reaction.* Glyco-BODIPYs **10a** and **10b** (1.0 equiv.) was dissolved in Ac<sub>2</sub>O/pyridine (0.5:2, 5 mL) and a catalytic amount of *N,N*-dimethylaminopyridine was added. The mixture was stirred 4 h and then diluted with methanol to destroy the excess of Ac<sub>2</sub>O. Solvents were evaporated in vacuo and chromatography of the residue on silica gel afforded the corresponding acetylated derivatives. These compounds were used to unambiguously establish the stereochemistry in the neoglycosylation reaction.

### 3. Synthetic procedures and compound characterization

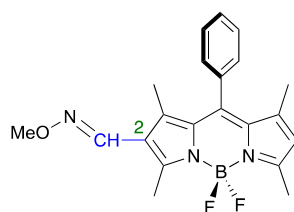

**9a**

**Compound 9a.** This compound was prepared according to general procedure I from formyl BODIPY **8a** (1,5 g, 4.26 mmol) and methoxyamine hydrochloride (1.06 g, 12.78 mmol). The residue was purified by flash chromatography (hexane:ethyl acetate 95:5) to give **9a** as an orange non crystalline solid (1.47g, 91%). <sup>1</sup>H NMR (400 MHz, CDCl<sub>3</sub>) δ

7.80 (s, 1H), 7.32 – 7.18 (m, 3H), 7.10 – 6.98 (m, 2H), 5.81 (s, 1H), 3.67 (s, 3H), 2.49 (s, 3H), 2.35 (s, 3H), 1.23 (s, 3H), 1.15 (s, 3H). <sup>13</sup>C NMR (101 MHz, CDCl<sub>3</sub>) δ 157.9, 154.6, 144.9, 143.0, 142.5, 140.2, 134.9, 132.5, 130.7, 129.4, 129.3, 128.1, 128.0, 122.5, 121.8, 62.0, 14.9, 14.7, 14.2, 12.5. [M+H]<sup>+</sup> calcd for C<sub>21</sub>H<sub>23</sub>BF<sub>2</sub>N<sub>3</sub>O: 382.1900; found 382.1906.

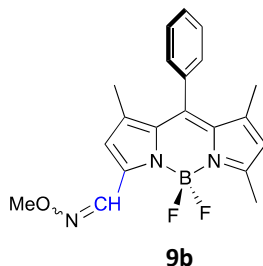

**Compound 9b.** This compound was prepared according to general procedure I from formyl BODIPY **8b** (500 mg, 1.48 mmol) and methoxyamine hydrochloride (370 mg, 4.44 mmol). The residue was purified by flash chromatography (hexane:ethyl acetate 95:5) to give **9b** as an orange non crystalline solid (461 mg, 84%). For the major compound: <sup>1</sup>H NMR (400 MHz, CDCl<sub>3</sub>) δ 8.53 (s, 1H), 7.58 – 7.42 (m, 3H), 7.39 – 7.20 (m, 2H), 6.65 (s, 1H), 6.06 (s, 1H), 4.00 (s, 3H), 2.57 (s, 3H), 1.40 (s, 6H). <sup>1</sup>H NMR (400 MHz, CDCl<sub>3</sub>) δ 7.80 (s, 1H), 7.32 – 7.18 (m, 3H), 7.10 – 6.98 (m, 2H), 5.81 (s, 1H), 3.67 (s, 3H), 2.49 (s, 3H), 2.35 (s, 3H), 1.23 (s, 3H), 1.15 (s, 3H). <sup>13</sup>C NMR (101 MHz, CDCl<sub>3</sub>) δ 159.3, 145.9, 144.5, 142.3, 142.3, 141.4, 134.7, 133.1, 132.5, 129.5, 129.5, 129.4, 129.4, 128.0, 127.9, 122.8, 122.8, 117.9, 62.7, 15.1, 14.7, 14.4. <sup>19</sup>F NMR (376 MHz, CDCl<sub>3</sub>) δ -141.11 (q, 33.1 Hz, minor isomer), -141.53 (q, 33.0 Hz, major isomer). HRMS (ESI/Q-TOF) m/z: [M+H]<sup>+</sup> calcd for C<sub>20</sub>H<sub>21</sub>BF<sub>2</sub>N<sub>3</sub>O: 368.17439; found 368.1751; [M+Na]<sup>+</sup> calcd for C<sub>20</sub>H<sub>20</sub>BF<sub>2</sub>N<sub>3</sub>NaO: 390.1563; found 390.1557.

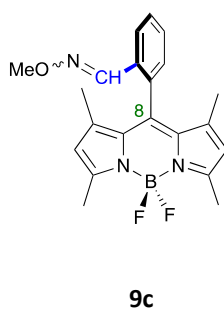

**Compound 9c.** This compound was prepared according to general procedure I from formyl BODIPY **8c** (500 mg, 1.42 mmol) and methoxyamine hydrochloride (355 mg, 4.26 mmol). The residue was purified by flash chromatography (hexane:ethyl acetate 95:5) to give **9c** as an orange non crystalline solid (390 mg, 74%). <sup>1</sup>H NMR (300 MHz, CDCl<sub>3</sub>) δ 8.09 – 7.94 (m, 2H), 7.57 – 7.42 (m, 2H), 7.24 (ddd, *J* = 5.5, 3.4, 2.3 Hz, 1H), 5.98 (s, 2H), 3.91 (s, 3H), 2.56 (s, 6H), 1.36 (s, 6H). <sup>13</sup>C NMR (75 MHz, CDCl<sub>3</sub>) δ 156.0, 145.2, 142.9, 138.4, 134.1, 131.3, 130.7, 130.5, 129.5, 128.7, 125.9, 121.5, 62.1, 14.6, 13.9. HRMS

(ESI/Q-TOF)  $m/z$ :  $[M+H]^+$  calcd for  $C_{21}H_{23}BF_2N_3O$ : 382.1900; found 382.1911;  $[M+Na]^+$  calcd for  $C_{21}H_{22}BF_2N_3NaO$ : 404.1720; found 404,1732.

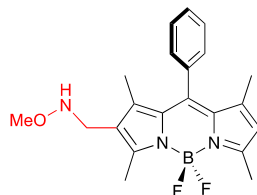

6a

**Compound 6a.** This compound was prepared according to general procedure II from BODIPY-O-methyl oxime **9a** (1,25 g, 3.28 mmol) and  $NaCNBH_3$  (1.23 g, 19.7 mmol). The residue was purified by flash chromatography (hexane:ethyl acetate 9:1 to 8:2) to give **9a** as a dark red non crystalline solid (829 mg, 66%).  $^1H$  NMR (400 MHz,  $CDCl_3$ )  $\delta$  7.48 (m, 3H), 7.32 – 7.24 (m, 2H), 5.99 (s, 1H), 3.81 (s, 2H), 3.51 (s, 3H), 2.60 (s, 3H), 2.55 (s, 3H), 1.38 (s, 3H), 1.36 (s, 3H);  $^{13}C$  NMR (101 MHz,  $CDCl_3$ )  $\delta$  156.2, 155.5, 143.8, 142.1, 141.7, 135.4, 131.9, 131.1, 129.5, 129.3, 128.3, 125.4, 121.8, 62.1, 45.1, 14.9, 14.7, 12.9, 12.2.  $^{11}B$  NMR (128 MHz,  $CDCl_3$ )  $\delta$  0.71 (t,  $J = 33.1$  Hz);  $^{19}F$  NMR (376 MHz,  $CDCl_3$ )  $\delta$  -146.86 (q,  $J = 32.8$  Hz). HRMS (ESI/Q-TOF)  $m/z$ :  $[M+H]^+$  calcd for  $C_{21}H_{25}BF_2N_3O$ : 384.2057; found 384.2061;  $[M+Na]^+$  calcd for  $C_{21}H_{24}BF_2N_3NaO$ : 406.1876; found 406,1888.

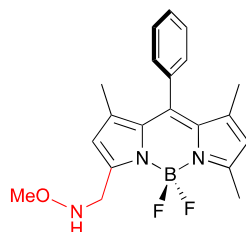

6b

**Compound 6b.** This compound was prepared according to general procedure II from BODIPY-O-methyl oxime **9b** (400 mg, 1.05 mmol) and  $NaCNBH_3$  (395 mg, 6.3 mmol). The residue was purified by flash chromatography (hexane:ethyl acetate 9:1 to 8:2) to give **9a** as a dark red non crystalline solid (281 mg, 73%).  $^1H$  NMR (400 MHz,  $CDCl_3$ )  $\delta$  7.50 – 7.48 (m, 3H), 7.35 – 7.26 (m, 2H), 6.22 (s, 1H), 6.03 (s, 1H), 4.34 (s, 2H), 3.60 (s, 3H), 2.56 (s, 3H), 1.39 (s, 6H).  $^{13}C$  NMR (101 MHz,  $CDCl_3$ )  $\delta$  158.1, 152.9, 145.3, 143.2, 142.5, 135.0, 132.5, 131.7, 129.5, 129.4, 129.4, 128.2, 128.1, 122.4, 121.1, 61.8, 48.7, 15.1, 14.8, 14.7.  $^{19}F$  NMR (376 MHz,  $CDCl_3$ )  $\delta$  -146.86 (q,  $J = 32.8$  Hz). HRMS (ESI/Q-TOF)  $m/z$ :  $[M+H]^+$  calcd for  $C_{20}H_{23}BF_2N_3O$ : 370.1900; found 370.1916;  $[M+Na]^+$  calcd for  $C_{20}H_{22}BF_2N_3NaO$ : 392.1720; found 392.1733.





12.6, 11.8. HRMS (ESI/Q-TOF)  $m/z$ :  $[M+Na]^+$  calcd for  $C_{27}H_{34}BF_2N_3NaO_6$ : 568.2406; found 568.2376.

This compound was also prepared, in a preferred manner, following general procedure IV from methoxyamine **6a** (50 mg, 0.13 mmol), D-glucose (70 mg, 0.39 mmol) and 5-methoxyanthranilic acid (2.2 mg, 0.013 mmol) under microwave irradiation for 1 h. The residue was purified by flash chromatography (ethyl acetate: methanol 95:5) to give **10a** as a red solid (62 mg, 87%).

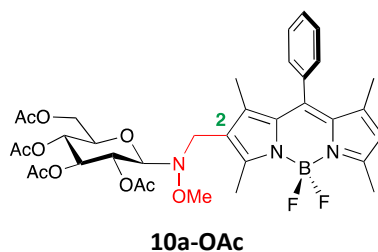

Due to the overlap of signals in the  $^1H$  NMR spectrum, in **10a** and in order to unequivocally assign the stereochemistry with which the neoglycosylation reaction took place, an acetylation reaction according to general procedure V was carried out **10a-OAc**:  $^1H$  NMR (300 MHz,  $CDCl_3$ )  $\delta$  7.61 – 7.42 (m, 3H), 7.39 – 7.26 (m, 2H), 6.02 (s, 1H), 5.28 (t,  $J = 9.2$  Hz, 1H), 5.14 (t,  $J = 9.2$ , 1H), 5.02 (t,  $J = 9.2$  Hz, 1H), 4.21 – 4.09 (m, 2H), 4.01 (d,  $J = 12.7$  Hz, 1H), 3.96 (d,  $J = 9.2$  Hz, 1H,  $H_{anomeric}$ ), 3.86 (d,  $J = 12.3$  Hz, 1H), 3.57 – 3.35 (m, 1H), 3.47 (s, 3H), 2.59 (s, 3H), 2.58 (s, 3H), 2.01 (s, 3H), 1.99 (s, 3H), 1.98 (s, 3H), 1.97 (s, 3H), 1.39 (s, 3H), 1.36 (s, 3H).

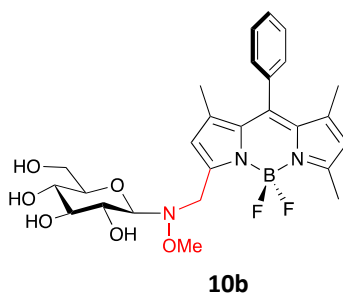

**Compound 10b.** This compound was prepared according to general procedure III from methoxyamine **6b** (50 mg, 0.135 mmol) and D-glucose (73 mg, 0.40 mmol). The residue was purified by flash chromatography (ethyl acetate: methanol 95:5) to give **10b** as a red solid (18 mg, 25%).  $[\alpha]_D^{25} +845.5$  (c 0.18,  $CH_3OH$ ); Mp 126 – 128 °C;  $^1H$  NMR (400 MHz,  $CD_3OD$ )  $\delta$  7.59 – 7.55 (m, 3H), 7.46 – 7.25 (m, 2H), 6.44 (s, 1H), 6.14 (s, 1H), 4.43 (d,  $J = 16$  Hz, 1H), 4.33 (d,  $J = 16$  Hz, 1H), 4.16 (d,  $J = 9.0$  Hz, 1H,  $H_{anomeric}$ ), 3.88 (dd,  $J = 12.0, 2.3$  Hz, 1H), 3.73 (dd,  $J = 12.1, 5.2$  Hz, 1H), 3.58 (s, 3H), 3.52 (t,  $J = 9.0$  Hz, 1H), 3.41 (t,  $J = 8.7$  Hz, 1H), 3.25 (ddd,  $J = 9.4, 5.2, 2.3$  Hz, 1H), 2.52 (s, 3H), 1.44 (s, 3H), 1.43 (s, 3H);  $^{13}C$  NMR (101 MHz,  $CD_3OD$ )  $\delta$  158.8, 154.7, 146.2, 144.6, 143.4, 136.1, 132.3, 130.5, 130.4, 129.1, 123.1, 122.4, 94.2, 79.7, 79.2, 71.7, 71.1, 62.8, 62.2, 50.0, 49.5, 14.5, 14.3;

$^{19}\text{F}$  NMR (376 MHz,  $\text{CD}_3\text{OD}$ )  $\delta$  -143.81 (ddd,  $J = 101.0, 65.2, 32.5$  Hz), -146.08 (ddd,  $J = 103.0, 65.0, 32.0$  Hz). HRMS (ESI/Q-TOF)  $m/z$ :  $[\text{M}+\text{H}]^+$  calcd for  $\text{C}_{26}\text{H}_{33}\text{BF}_2\text{N}_3\text{O}_6$ : 532.2430; found 532.2453;  $[\text{M}+\text{Na}]^+$  calcd for  $\text{C}_{26}\text{H}_{32}\text{BF}_2\text{N}_3\text{NaO}_6$ : 554.2249; found 554.2258.

This compound was also prepared, in a preferred manner, following general procedure IV from methoxyamine **6b** (50 mg, 0.135 mmol), D-glucose (73 mg, 0.40 mmol) and 5-methoxyanthranilic acid (2.2 mg, 0.013 mmol) under microwave irradiation for 1 h. The residue was purified by flash chromatography (ethyl acetate: methanol 95:5) to give **10a** as a red solid (55 mg, 76%).

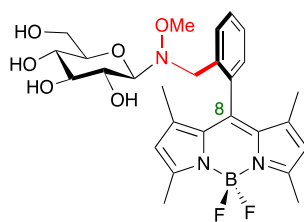

**10c**

**Compound 10c.** This compound was prepared according to general procedure III from methoxyamine **6c** (50 mg, 0.13 mmol) and D-glucose (70 mg, 0.39 mmol). The residue was purified by flash chromatography (ethyl acetate: methanol 95:5) to give **10c** as a red solid (28 mg, 40%).  $[\alpha]_{\text{D}}^{25} +824$  (c 0.2,  $\text{CH}_3\text{OH}$ ); Mp 128 – 130 °C;  $^1\text{H}$  NMR (400 MHz,  $\text{CDCl}_3$ )  $\delta$  7.55 (d,  $J = 6.6$  Hz, 1H), 7.50 – 7.43 (m, 2H), 7.30 – 7.27 (m, 1H), 6.02 (s, 1H), 6.00 (s, 1H), 4.07 (d,  $J = 13.3$  Hz, 1H), 3.93 (d,  $J = 13.3$  Hz, 1H), 3.87 – 3.76 (m, 3H), 3.56 – 3.34 (m, 2H), 3.31 (s, 3H), 3.16 – 3.08 (m, 1H), 2.55 (s, 3H), 2.54 (s, 3H), 1.38 (s, 3H), 1.34 (s, 3H);  $^{13}\text{C}$  NMR (101 MHz,  $\text{CDCl}_3$ )  $\delta$  156.3, 156.1, 143.0, 142.8, 139.9, 135.2, 133.8, 131.8, 131.6, 131.0, 129.8, 129.2, 128.9, 128.9, 128.4, 125.4, 121.8, 121.6, 91.3, 70.5, 70.1, 62.4, 61.5, 52.5, 29.8, 14.9, 14.8, 14.8, 14.3;  $^{11}\text{B}$  NMR (128 MHz,  $\text{CDCl}_3$ )  $\delta$  0.68 (t,  $J = 32.8$  Hz);  $^{19}\text{F}$  NMR (376 MHz,  $\text{CDCl}_3$ )  $\delta$  -145.5 – -145.9 (m, 1F), -147.7 – -148.1 (m, 1F). HRMS (ESI/Q-TOF)  $m/z$ :  $[\text{M}+\text{Na}]^+$  calcd for  $\text{C}_{27}\text{H}_{34}\text{BF}_2\text{N}_3\text{NaO}_6$ : 568.2406; found 568.2393.

In an alternative experiment this compound was prepared according to general procedure III from N-cyanoboronated-N-methoxyamine **6d** (50 mg, 0.12 mmol) and D-glucose (65 mg, 0.36 mmol). The residue was purified by flash chromatography (ethyl acetate: methanol 95:5) to give **10c** (16 mg, 25%).

This compound was also prepared, in a preferred manner, following general procedure IV from methoxyamine **6c** (50 mg, 0.13 mmol), D-glucose (70 mg, 0.39 mmol) and 5-methoxyanthranilic acid (2.2 mg, 0.013 mmol) under microwave irradiation for 1 h. The residue was purified by flash chromatography (ethyl acetate: methanol 95:5) to give **10a** as a red solid (59 mg, 87%).

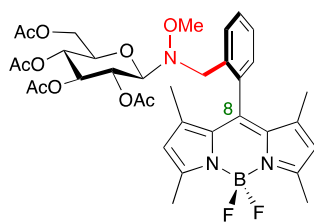

**10c-OAc**

Due to the overlap of signals in the  $^1\text{H}$  NMR spectrum of compound **10c** and to unequivocally assign the stereochemistry with which the neoglycosylation reaction took place, an acetylation reaction according to general procedure V was carried out to yield compound **10c-OAc**:  $^1\text{H}$  NMR (400 MHz,  $\text{CDCl}_3$ )  $\delta$  7.57 (dd,  $J = 7.4, 1.6$  Hz, 1H), 7.46 (dtd,  $J = 16.2, 7.4, 1.6$  Hz, 2H), 7.20 – 7.12 (m, 4H), 6.01 (s, 1H), 5.97 (s, 1H), 5.37 – 5.21 (m, 1H), 5.14 – 4.93 (m, 2H), 4.32 – 4.16 (m, 2H), 4.09 (d,  $J = 9.2$  Hz, 1H,  $H_{\text{anomeric}}$ ), 4.03 (dd,  $J = 12.4, 2.4$  Hz, 1H), 3.96 (d,  $J = 13.7$  Hz, 1H), 3.40 (ddd,  $J = 10.0, 5.0, 2.6$  Hz, 1H), 3.30 (s, 3H), 2.55 (s, 3H), 2.54 (s, 3H), 2.04 (s, 3H), 2.00 (s, 3H), 1.98 (s, 3H), 1.97 (s, 3H), 1.39 (s, 3H), 1.36 (s, 3H).;  $^{19}\text{F}$  NMR (376 MHz,  $\text{CDCl}_3$ )  $\delta$  -147.15 (ddd,  $J = 66.2, 40.5, 32.7$  Hz);  $^{11}\text{B}$  NMR (128 MHz,  $\text{CDCl}_3$ )  $\delta$  0.65 (t,  $J = 32.8$  Hz);  $^{13}\text{C}$  NMR (101 MHz,  $\text{CDCl}_3$ )  $\delta$  170.8, 170.5, 169.5, 169.4, 156.3, 155.6, 143.4, 142.3, 139.8, 138.0, 135.1, 134.2, 131.8, 130.8, 130.5, 129.5, 129.2, 128.9, 128.7, 128.4, 125.4, 121.5, 89.6, 77.5, 77.4, 77.2, 76.8, 74.4, 73.7, 68.4, 68.3, 62.1, 61.1, 52.3, 32.1, 20.8, 20.8, 20.8, 20.7, 14.8, 14.7, 14.3, 14.2.

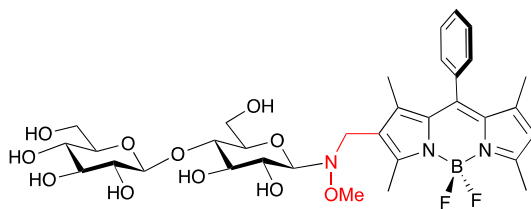

**12**

**Compound 12.** This compound was also prepared following general procedure IV from methoxyamine **6a** (50 mg, 0.13 mmol), D-cellobiose (133 mg, 0.39 mmol) and 5-methoxyanthranilic acid (2.2 mg, 0.013 mmol) under microwave irradiation for 4 h. The residue was purified by flash chromatography (dichloromethane: methanol 9:1 to 8:2) to give **12** as a red solid (63 mg, 69%).  $[\alpha]_{\text{D}}^{25}$  -188.5 (c 0.2,  $\text{CH}_3\text{OH}$ ); Mp 159 – 160 °C;  $^1\text{H}$  NMR (400 MHz,  $\text{CD}_3\text{OD}$ )  $\delta$  7.56 – 7.53 (m, 3H), 7.32 – 7.29 (m, 2H), 6.06 (s, 1H), 4.41 (d,  $J = 7.8$  Hz, 1H), 3.96 (d,  $J = 12.0$  Hz, 1H), 3.92 (d,  $J = 12.0$  Hz, 1H), 3.90 – 3.75 (m, 3H), 3.65 (dd,  $J = 12, 8.0$  Hz, 1H), 3.60 – 3.45 (m, 5H), 3.34 (s, 3H), 3.31 – 3.12 (m, 1H), 2.59 (s, 3H), 2.48 (s, 3H), 1.45 (s, 3H), 1.33 (s, 3H).  $^{13}\text{C}$  NMR (101 MHz,  $\text{CD}_3\text{OD}$ )  $\delta$  156.6, 156.1, 144.1, 142.9, 142.7, 135.7, 132.0, 131.3, 129.8, 129.7, 128.7, 126.2, 121.7, 103.9, 91.6, 79.4, 77.5, 77.4, 77.3, 77.2, 76.9, 74.3, 70.7, 70.5, 61.8, 61.2, 45.5, 14.0, 12.3, 11.6.  $^{19}\text{F}$  NMR (376 MHz,  $\text{CDCl}_3$ )  $\delta$  -144.2 – -152.2 (m, 2F). HRMS (ESI/Q-TOF)  $m/z$ :  $[\text{M}+\text{Na}]^+$  calcd for  $\text{C}_{33}\text{H}_{44}\text{BF}_2\text{N}_3\text{NaO}_{11}$ : 730.2935; found 730.2941.

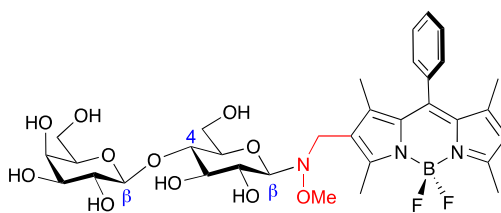

**13**

**Compound 13.** This compound was also prepared following general procedure IV from methoxyamine **6a** (50 mg, 0.13 mmol), D-lactose (133 mg, 0.39 mmol) and 5-methoxyanthranilic acid (2.2 mg, 0.013 mmol) under microwave irradiation for 6 h. The residue was purified by flash chromatography (dichloromethane: methanol 9:1 to 8:2) to give **13** as a red solid (68 mg, 74%).  $[\alpha]_D^{25} +617.5$  (c 0.8, CH<sub>3</sub>OH); Mp 140 – 142 °C; <sup>1</sup>H NMR (400 MHz, CD<sub>3</sub>OD)  $\delta$  7.56 – 7.53 (m, 3H), 7.32 – 7.29 (m, 2H), 6.08 (s, 1H), 4.39 (d,  $J$  = 7.3 Hz, 1H), 4.05 – 3.91 (m, 2H), 3.90 – 3.86 (m, 3H), 3.85 – 3.77 (m, 2H), 3.72 (dd,  $J$  = 11.5, 4.6 Hz, 1H), 3.63 – 3.55 (m, 2H), 3.54 (s, 3H), 3.51 (ddd,  $J$  = 12.4, 5.6, 3.0 Hz, 2H), 3.28 (dt,  $J$  = 9.6, 3.1 Hz, 1H), 2.61 (s, 3H), 2.51 (s, 3H), 1.46 (s, 3H), 1.40 (s, 3H).  $\delta$  6.06 (s, 1H), 4.41 (d,  $J$  = 7.8 Hz, 1H), 3.96 (d,  $J$  = 12.0 Hz, 1H), 3.92 (d,  $J$  = 12.0 Hz, 1H), 3.90 – 3.75 (m, 3H), 3.65 (dd,  $J$  = 12, 8.0 Hz, 1H), 3.60 – 3.45 (m, 5H), 3.34 (s, 3H), 3.31 – 3.12 (m, 1H), 2.59 (s, 3H), 2.48 (s, 3H), 1.45 (s, 3H), 1.33 (s, 3H). <sup>13</sup>C NMR (101 MHz, CD<sub>3</sub>OD)  $\delta$  156.6, 156.1, 144.1, 142.9, 142.7, 135.7, 132.0, 131.3, 129.8, 129.7, 128.7, 126.2, 121.7, 103.9, 91.6, 79.4, 77.5, 77.4, 77.3, 77.2, 76.9, 74.3, 70.7, 70.5, 61.8, 61.2, 45.5, 14.0, 12.3, 11.6. <sup>19</sup>F NMR (376 MHz, CDCl<sub>3</sub>)  $\delta$  -144.2 – -152.2 (m, 2F). HRMS (ESI/Q-TOF)  $m/z$ : [M+Na]<sup>+</sup> calcd for C<sub>33</sub>H<sub>44</sub>BF<sub>2</sub>N<sub>3</sub>NaO<sub>11</sub>: 730.2935; found 730.2952.

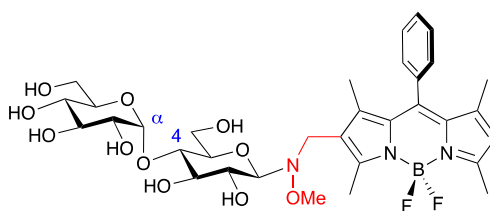

**14**

**Compound 14.** This compound was prepared following general procedure IV from methoxyamine **6a** (50 mg, 0.13 mmol), D-maltose (133 mg, 0.39 mmol) and 5-methoxyanthranilic acid (2.2 mg, 0.013 mmol) under microwave irradiation for 6 h. The residue was purified by flash chromatography (dichloromethane: methanol 9:1 to 8:2) to give **13** as a red solid (71 mg, 77%).  $[\alpha]_D^{25} +560.4$  (c 0.9, CH<sub>3</sub>OH); Mp 170 – 172 °C; <sup>1</sup>H NMR (400 MHz, CD<sub>3</sub>OD)  $\delta$  7.57 (m, 3H), 7.34 (m, 2H), 6.08 (s, 1H), 5.17 (d,  $J$  = 3.7 Hz, 1H), 3.97 – 3.23 (m, 18H), 2.61 (s, 3H), 2.51 (s, 3H), 1.46 (s, 3H), 1.40 (s, 3H). <sup>13</sup>C NMR (101 MHz, CD<sub>3</sub>OD)  $\delta$  157.3, 156.7, 144.7, 143.5, 143.4, 136.4, 132.7, 131.9, 130.5, 130.4,

130.3, 129.3, 126.9, 122.3, 102.9, 92.3, 80.9, 79.0, 78.3, 75.1, 74.8, 74.2, 71.5, 71.1, 62.7, 62.4, 62.2, 46.1, 14.6, 12.9, 12.2.  $^{19}\text{F}$  NMR (376 MHz,  $\text{CDCl}_3$ )  $\delta$  - 145.9 – -146.8 (m, 2F). HRMS (ESI/Q-TOF)  $m/z$ :  $[\text{M}+\text{Na}]^+$  calcd for  $\text{C}_{33}\text{H}_{44}\text{BF}_2\text{N}_3\text{NaO}_{11}$ : 730.2935; found 730.2958.

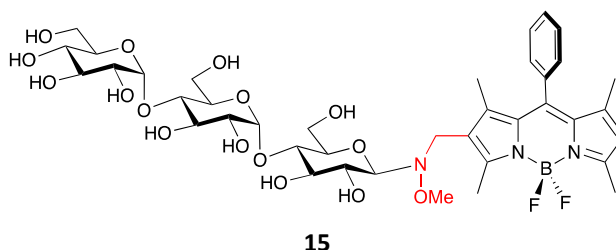

**Compound 15.** This compound was prepared following general procedure IV from methoxyamine **6a** (50 mg, 0.13 mmol), D-maltotriose (205 mg, 0.39 mmol) and 5-methoxyanthranilic acid (2.2 mg, 0.013 mmol) under microwave irradiation for 8 h. The residue was purified by flash chromatography (Ethyl acetate: methanol: water 17:2:1) to give **13** as a red solid (77 mg, 68%).  $[\alpha]_{\text{D}}^{25}$  -44.0 (c 0.88,  $\text{CH}_3\text{OH}$ ); Mp 185 – 187 °C;  $^1\text{H}$  NMR (400 MHz,  $\text{CD}_3\text{OD}$ )  $\delta$  7.57 – 7.56 (m, , 3H), 7.43 – 7.26 (m, 2H), 6.08 (s, 1H), 5.18 (dd,  $J$  = 4.0, 2.0 Hz, 2H), 4.05 – 3.93 (m, 2H), 3.93 – 3.75 (m, 7H), 3.75 – 3.44 (m, 12H), 3.35 – 3.24 (m, 2H), 2.61 (s, 3H), 2.51 (s, 3H), 1.46 (s, 3H), 1.40 (s, 3H).  $^{13}\text{C}$  NMR (101 MHz,  $\text{CD}_3\text{OD}$ )  $\delta$   $^{13}\text{C}$  NMR (101 MHz,  $\text{CDCl}_3$ )  $\delta$  157.3, 156.7, 144.6, 143.5, 143.3, 136.3, 132.7, 131.9, 130.5, 130.3, 129.9, 129.3, 129.3, 129.2, 126.9, 126.3, 122.4, 102.8, 102.7, 92.3, 81.3, 80.8, 79.0, 78.3, 75.1, 74.9, 74.7, 74.2, 73.8, 73.3, 71.5, 71.0, 62.7, 62.4, 62.2, 62.1, 46.1, 14.6, 13.0, 12.3.  $^{19}\text{F}$  NMR (376 MHz,  $\text{CDCl}_3$ )  $\delta$  - 143.3 (bs, 2F). HRMS (ESI/Q-TOF)  $m/z$ :  $[\text{M}+\text{Na}]^+$  calcd for  $\text{C}_{39}\text{H}_{54}\text{BF}_2\text{N}_3\text{NaO}_{16}$ : 892.3604; found 892.3463.

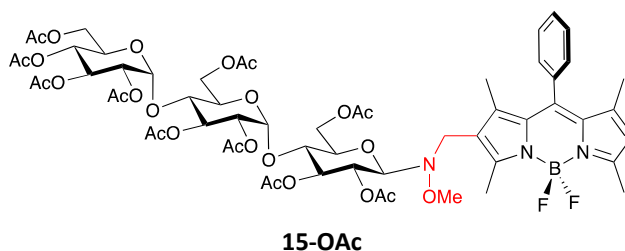

Due to the overlap of signals in the  $^1\text{H}$  NMR spectrum, in **15** and in order to unequivocally assign the stereochemistry with which the neoglycosylation reaction took place, an acetylation reaction according to general procedure V was carried out **15-OAc**:  $^1\text{H}$  NMR (500 MHz,  $\text{CDCl}_3$ )  $\delta$  7.70 – 7.44 (m, 3H), 7.42 – 7.34 (m, 2H), 6.01 (s, 1H), 5.41 – 5.31 (m, 4H), 5.26 (d,  $J$  = 4.2 Hz, 1H), 5.22 (t,  $J$  = 9.0 Hz, 1H), 5.11 (t,  $J$  = 9.2 Hz, 1H), 5.06 (t,  $J$  = 9.9 Hz, 1H), 4.86 (dd,  $J$  = 10.4, 4.0 Hz, 1H), 4.74 (dd,  $J$  = 10.4, 4.2 Hz, 1H), 4.45 (dd,  $J$  = 12.4, 2.5 Hz, 1H), 4.40 (dd,  $J$  = 12.0, 3.0 Hz, 1H), 4.27 – 4.22 (m, 3H), 4.19 (dd,  $J$  = 12.3, 4.0 Hz, 1H), 4.05 (dd,  $J$  = 12.5, 2.3 Hz, 1H), 4.02 – 3.93 (m, 4H), 4.01 (d,  $J$  = 8.9 Hz, 1H,  $H_{\text{anomeric}}$ ) 3.92 – 3.81 (m, 4H), 3.52 (ddd,  $J$  = 8.8, 5.5, 3.0 Hz, 1H), 3.41 (s, 3H), 2.58 (s, 3H), 2.56 (s,

3H), 2.14 (s, 3H), 2.10 (s, 3H), 2.07 (s, 3H), 2.06 (s, 3H), 2.03 (s, 3H), 2.00 (s, 6H), 1.99 (s, 3H), 1.96 (s, 3H), 1.94 (s, 3H), 1.39 (s, 3H), 1.38 (s, 3H).  $^{13}\text{C}$  NMR (126 MHz,  $\text{CDCl}_3$ )  $\delta$  170.5, 170.3, 170.1, 169.8, 169.7, 169.6, 169.4, 156.3, 141.8, 141.1, 134.9, 130.6, 129.3, 129.1, 129.0, 128.0, 127.8, 121.6, 95.7, 87.2, 77.2, 77.1, 76.9, 76.7, 74.0, 73.6, 72.7, 71.6, 70.2, 70.0, 69.3, 69.0, 68.8, 68.4, 67.8, 63.5, 62.3, 61.3, 61.0, 45.2, 44.3, 29.6, 27.6, 21.4, 20.8, 20.8, 20.7, 20.6, 20.5, 20.4, 14.6, 14.4, 12.3, 11.3.

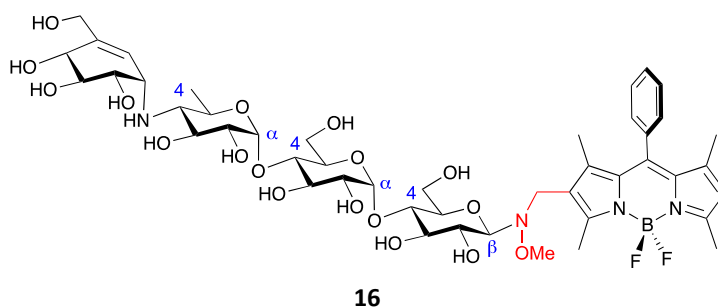

**Compound 16.** This compound was prepared following general procedure IV from methoxyamine **6a** (50 mg, 0.13 mmol), acarbose (168 mg, 0.13 mmol) and 5-methoxyanthranilic acid (2.2 mg, 0.013 mmol) under microwave irradiation for 8 h. The residue was purified by flash chromatography (Ethyl acetate: methanol: water 12:2:1) to give **16** as a red solid (71 mg, 52%).  $[\alpha]_D^{25}$  -28.1 (c 0.4,  $\text{CH}_3\text{OH}$ ); Mp 174 – 176 °C;  $^1\text{H}$  NMR (500 MHz,  $\text{CD}_3\text{OD}$ )  $\delta$  7.57 – 7.36 (m, 3H), 7.41 – 7.22 (m, 2H), 6.08 (s, 1H), 5.94 – 5.79 (m, 1H), 5.17 (d,  $J$  = 3.8 Hz, 1H), 5.04 (d,  $J$  = 3.7 Hz, 1H), 4.24 – 4.08 (m, 2H), 4.02 – 3.90 (m, 3H), 3.88 – 3.65 (m, 9H), 3.62 – 3.39 (m, 13H), 3.36 (s, 3H), 3.23 (ddd,  $J$  = 9.4, 4.2, 2.1 Hz, 1H), 2.60 (s, 3H), 2.50 (s, 3H), 2.34 (t,  $J$  = 9.8 Hz, 1H), 1.46 (s, 3H), 1.39 (s, 3H), 1.32 (d,  $J$  = 6.2 Hz, 3H).  $^{13}\text{C}$  NMR (126 MHz,  $\text{CD}_3\text{OD}$ )  $\delta$  157.3, 156.7, 144.7, 143.5, 143.4, 141.5, 136.4, 132.7, 131.9, 130.5, 130.3, 129.3, 129.3, 126.9, 123.8, 122.3, 103.3, 102.7, 92.3, 81.8, 80.8, 79.0, 78.3, 75.5, 75.0, 74.9, 74.5, 73.8, 73.5, 73.0, 72.8, 71.2, 71.0, 66.9, 63.3, 62.4, 62.3, 62.2, 57.8, 46.1, 18.7, 14.6, 12.9, 12.3.  $^{19}\text{F}$  NMR (376 MHz,  $\text{CDCl}_3$ )  $\delta$  -146.73– -147.27(m, 2F). HRMS (ESI/Q-TOF)  $m/z$ :  $[\text{M}+\text{Na}]^+$  calcd for  $\text{C}_{48}\text{H}_{68}\text{BF}_2\text{N}_4\text{O}_{16}$ : 1053.4541; found 1053.4576

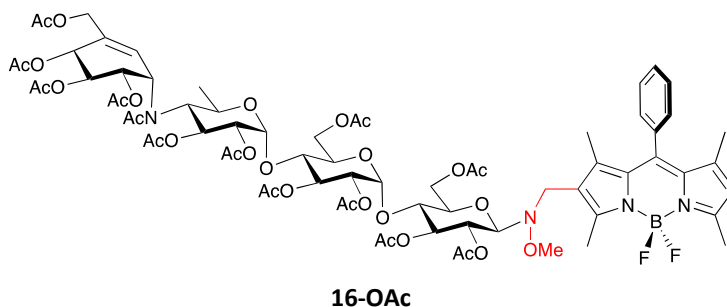

Due to the overlap of signals in the  $^1\text{H}$  NMR spectrum, in **16** and in order to unequivocally assign the stereochemistry with which the neoglycosylation reaction took place, an acetylation reaction according to general procedure V was carried out to yield **16-OAc**.  $^1\text{H}$  NMR (500 MHz,  $\text{CD}_3\text{OD}$ )  $\delta$  7.57 – 7.36 (m, 3H), 7.41 – 7.22 (m, 2H), 6.02 (s, 1H), 5.94 (d,  $J = 4.0$  Hz, 1H), 5.61 – 5.49 (m, 3H), 5.34 (dd,  $J = 10.3, 8.7$  Hz, 1H), 5.26 (d,  $J = 4.2$  Hz, 1H), 5.18 – 5.16 (m, 2H), 5.12 – 5.06 (m, 2H), 4.92 (dd,  $J = 10.1, 4.1$  Hz, 1H), 4.78 – 4.70 (m, 2H), 4.65 (d,  $J = 13.1$  Hz, 1H), 4.50 – 4.32 (m, 3H), 4.24 (dd,  $J = 12.0, 5.3$  Hz, 1H), 4.18 (dd,  $J = 12.3, 3.8$  Hz, 1H), 4.00 – 3.81 (m, 5H), 3.71 (t,  $J = 4.8$  Hz, 1H), 3.59 – 3.45 (m, 2H), 3.40 (s, 3H), 2.58 (s, 3H), 2.56 (s, 3H), 2.38 (t,  $J = 10.0$  Hz, 1H), 2.13 (s, 3H), 2.10 (s, 3H), 2.05 (s, 3H), 2.04 (s, 3H), 2.03 (s, 9H), 2.00 (s, 6H), 1.98 (s, 3H), 1.96 (s, 3H), 1.95 (s, 3H), 1.93 (s, 3H), 1.38 (s, 3H), 1.36 (s, 3H), 1.20 (d,  $J = 6.2$  Hz, 3H);  $^{13}\text{C}$  NMR (101 MHz,  $\text{CDCl}_3$ )  $\delta$  171.0, 170.9, 170.8, 170.8, 170.7, 170.5, 170.4, 170.4, 170.3, 170.2, 169.9, 169.6, 156.4, 155.0, 143.9, 141.9, 141.3, 135.0, 133.9, 131.8, 130.7, 129.4, 129.2, 129.1, 128.1, 128.0, 127.9, 123.8, 121.6, 96.0, 95.9, 95.7, 87.3, 73.7, 72.6, 72.3, 72.2, 71.9, 71.1, 71.0, 70.9, 70.7, 70.5, 70.4, 70.1, 69.8, 69.1, 69.1, 63.5, 63.1, 62.4, 61.3, 61.1, 52.2, 44.4, 21.0, 20.9, 20.9, 20.8, 20.8, 20.8, 20.8, 20.7, 20.7, 20.6, 20.6, 20.6, 18.1, 14.7, 14.5, 12.4, 11.4.



### 3. Copies of $^1\text{H}$ , $^{13}\text{C}$ { $^1\text{H}$ }, $^{19}\text{F}$ , $^{11}\text{B}$ NMR Spectra

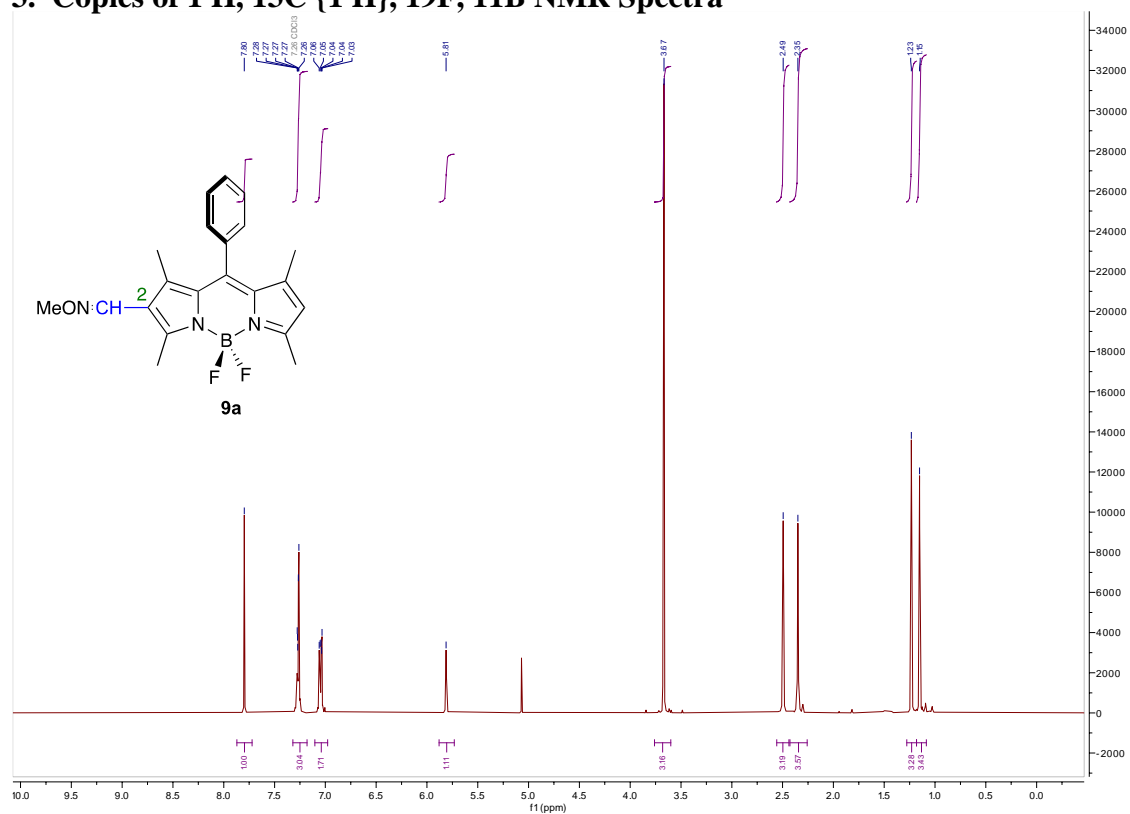

**Fig S1.**  $^1\text{H}$ -NMR (400 MHz,  $\text{CDCl}_3$ ) for **9a**

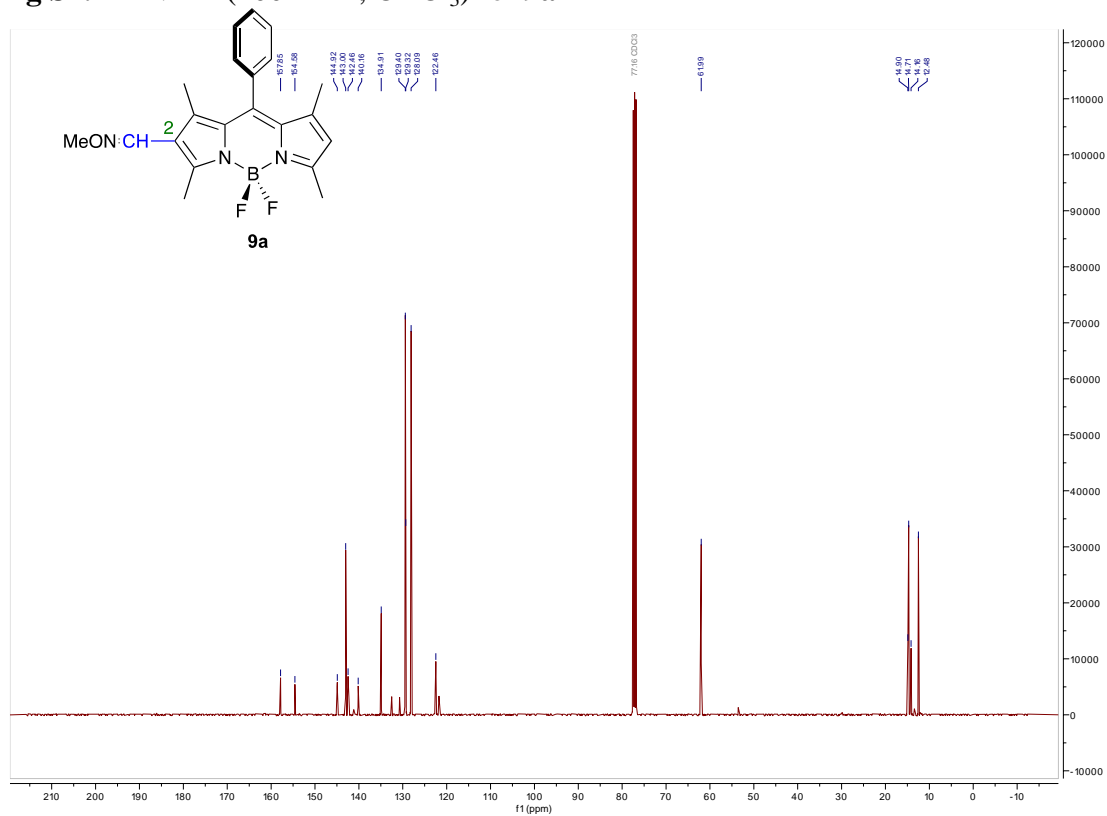

**Fig S2.**  $^{13}\text{C}$ { $^1\text{H}$ } NMR (101 MHz,  $\text{CDCl}_3$ ) of **9a**

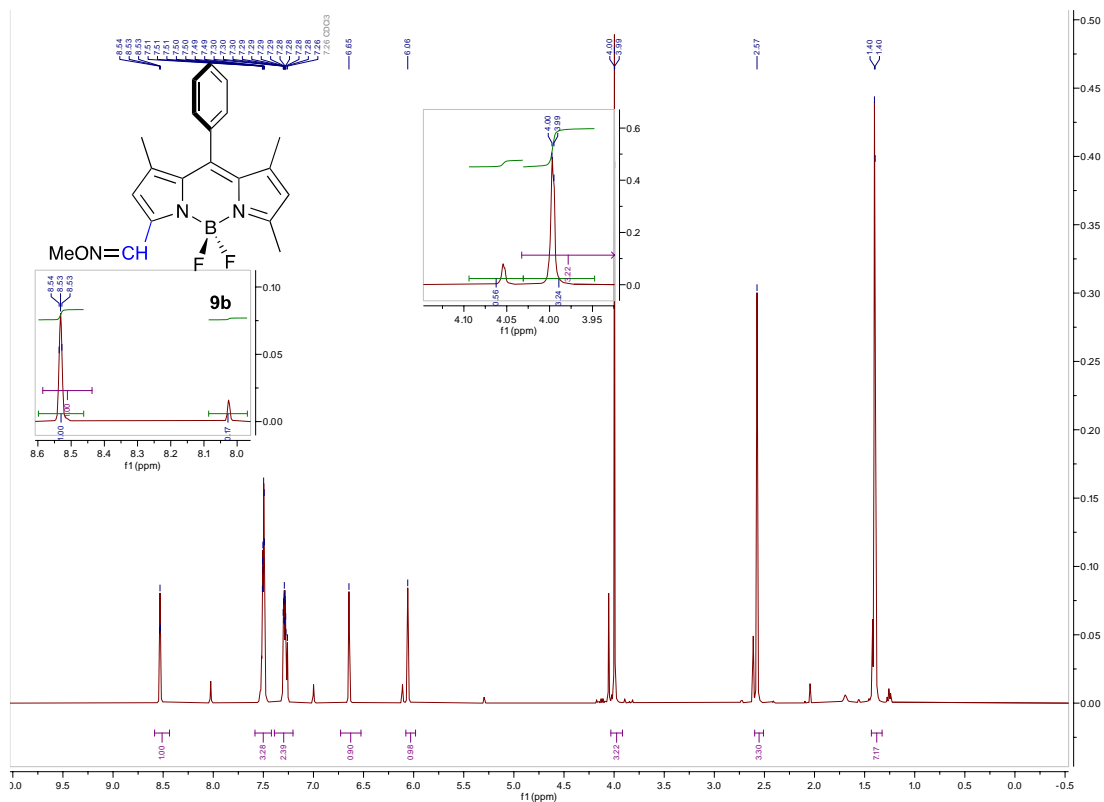

**Fig S3.**  $^1\text{H-NMR}$  (400 MHz,  $\text{CDCl}_3$ ) for **9b**

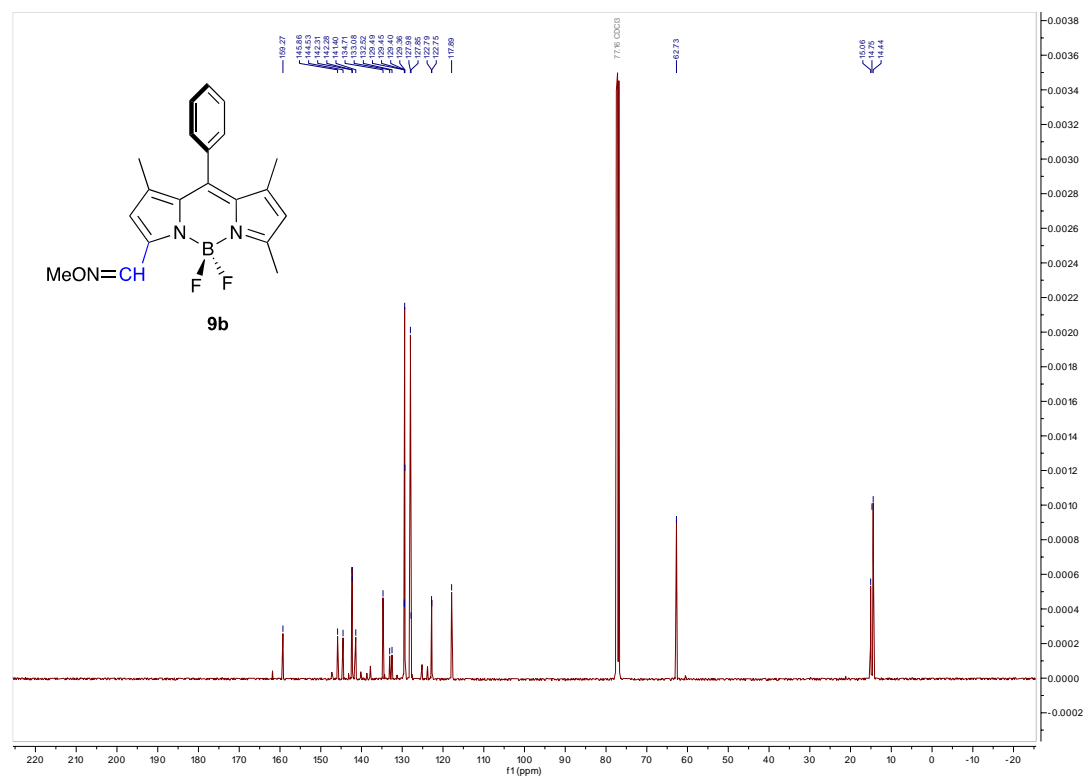

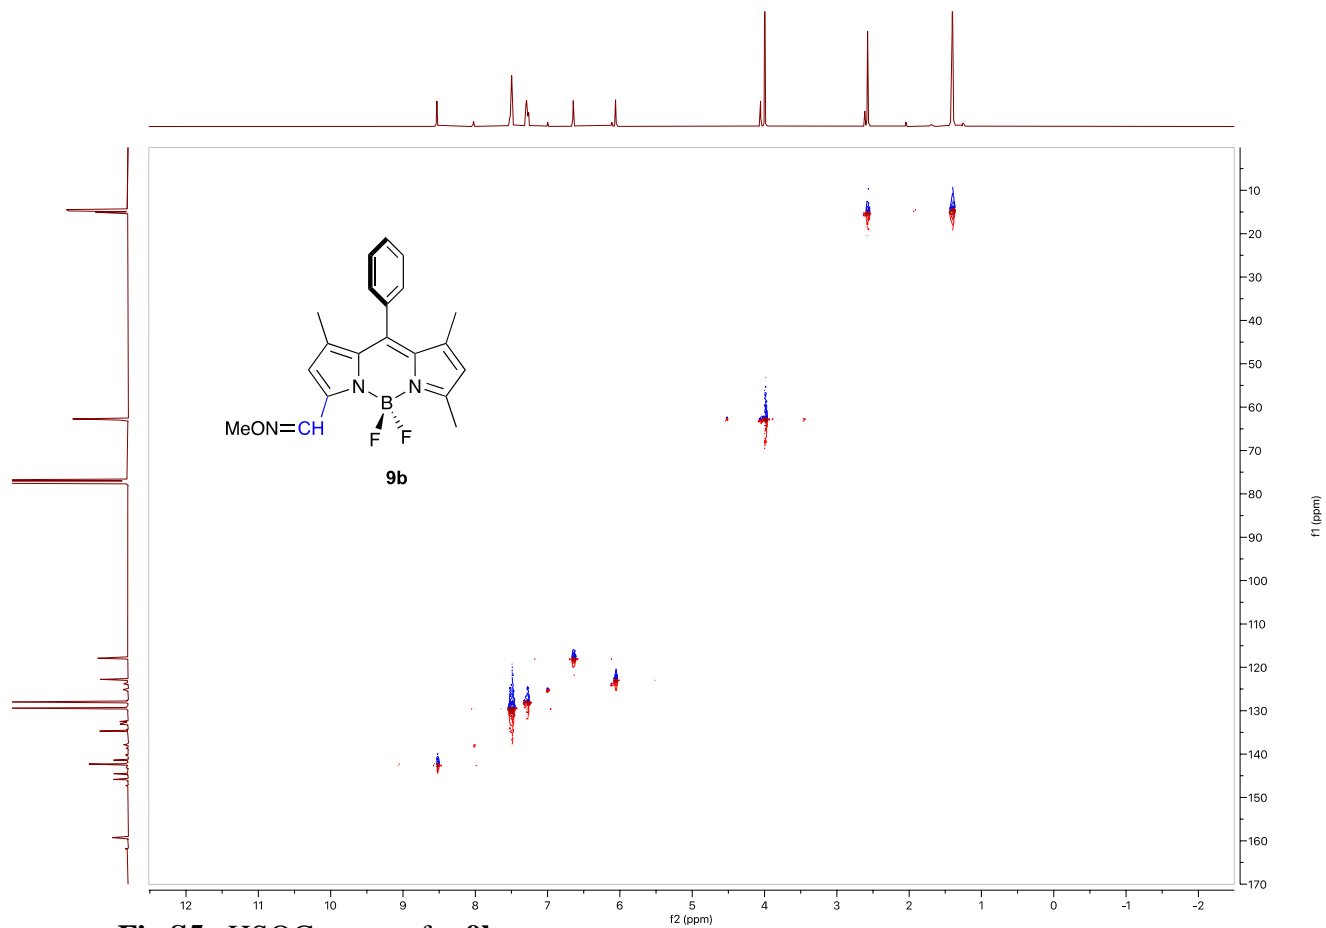

**Fig S5.** HSQC spectra for **9b**

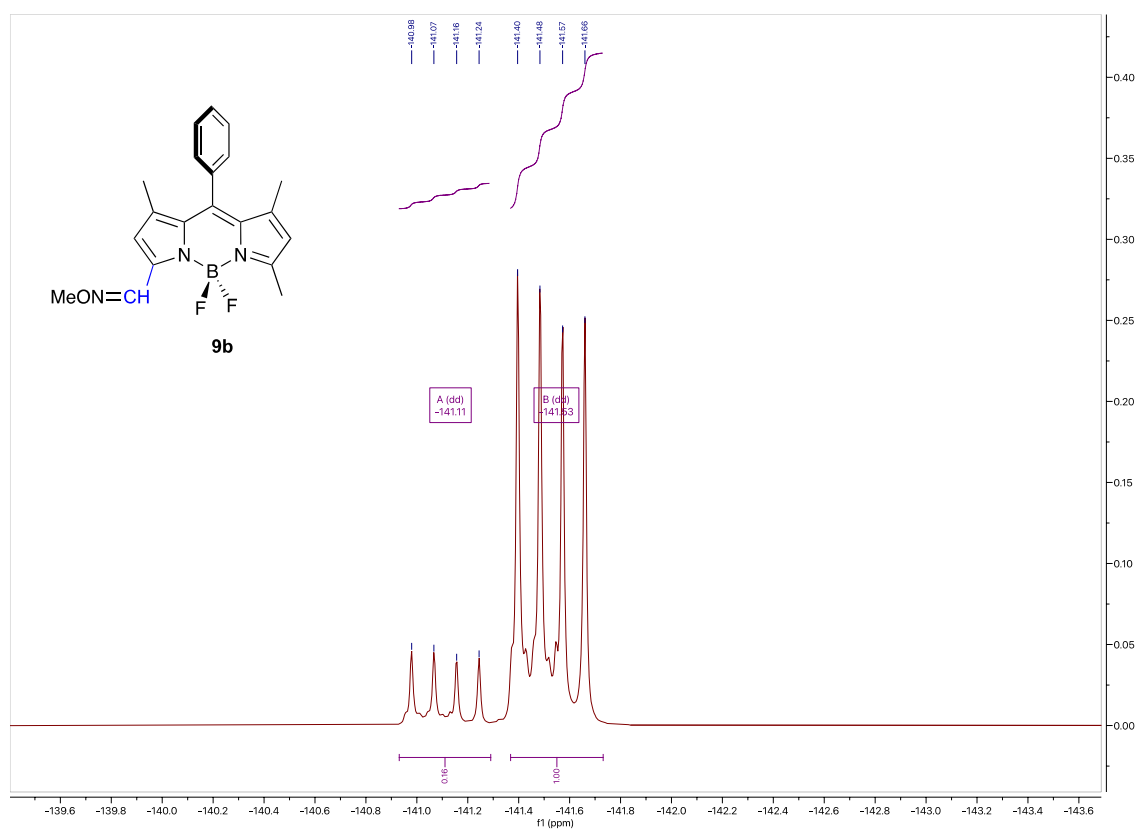

**Fig S6.** <sup>19</sup>F NMR (376 MHz, CDCl<sub>3</sub>) of **9b**

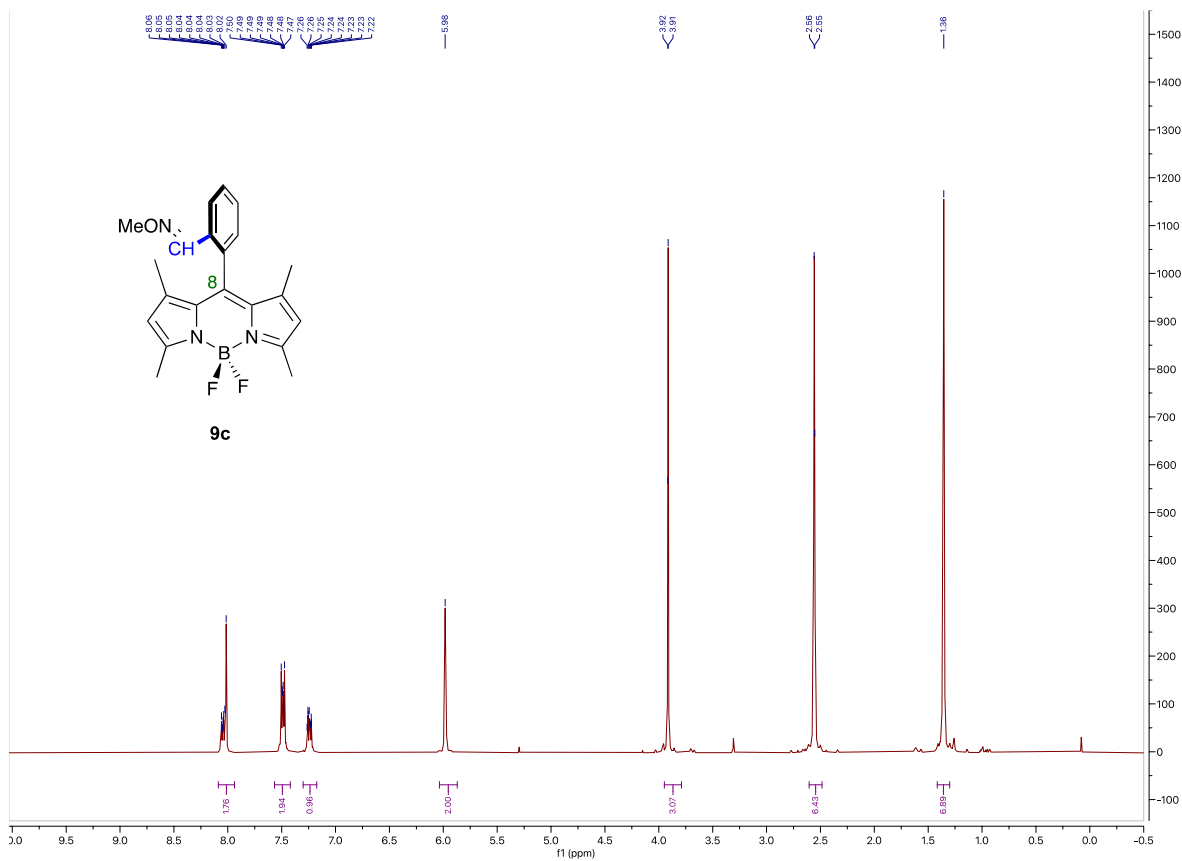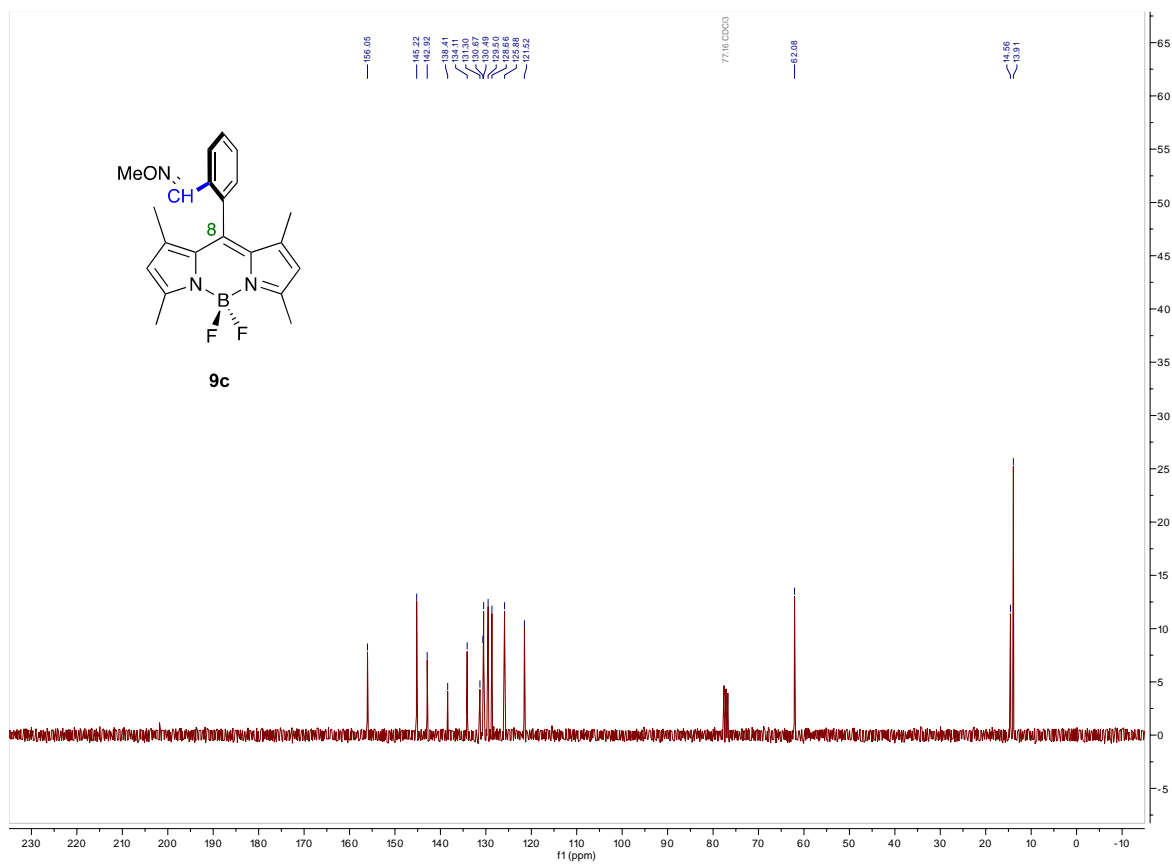

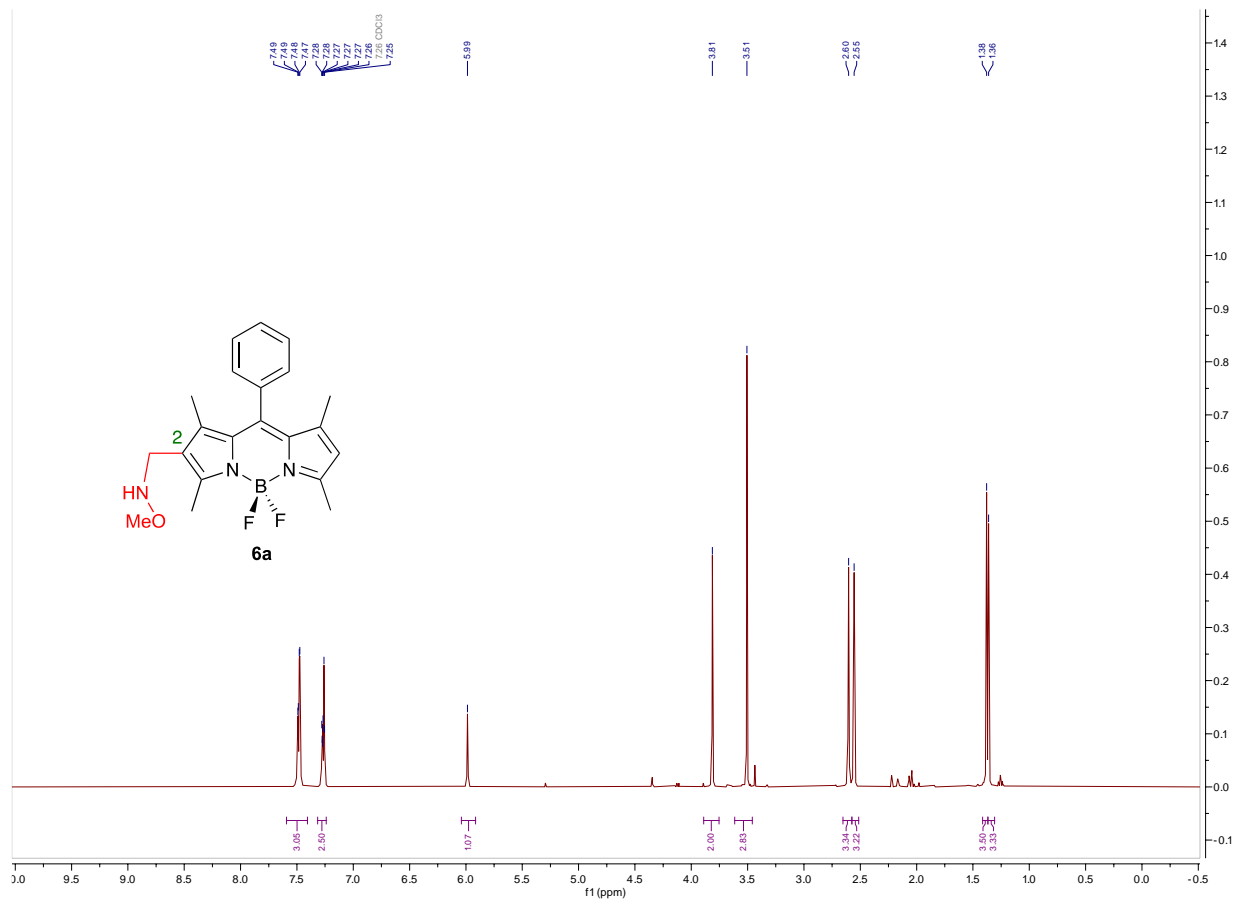

**Fig S9.** <sup>1</sup>H-NMR (400 MHz, CDCl<sub>3</sub>) for **6a**

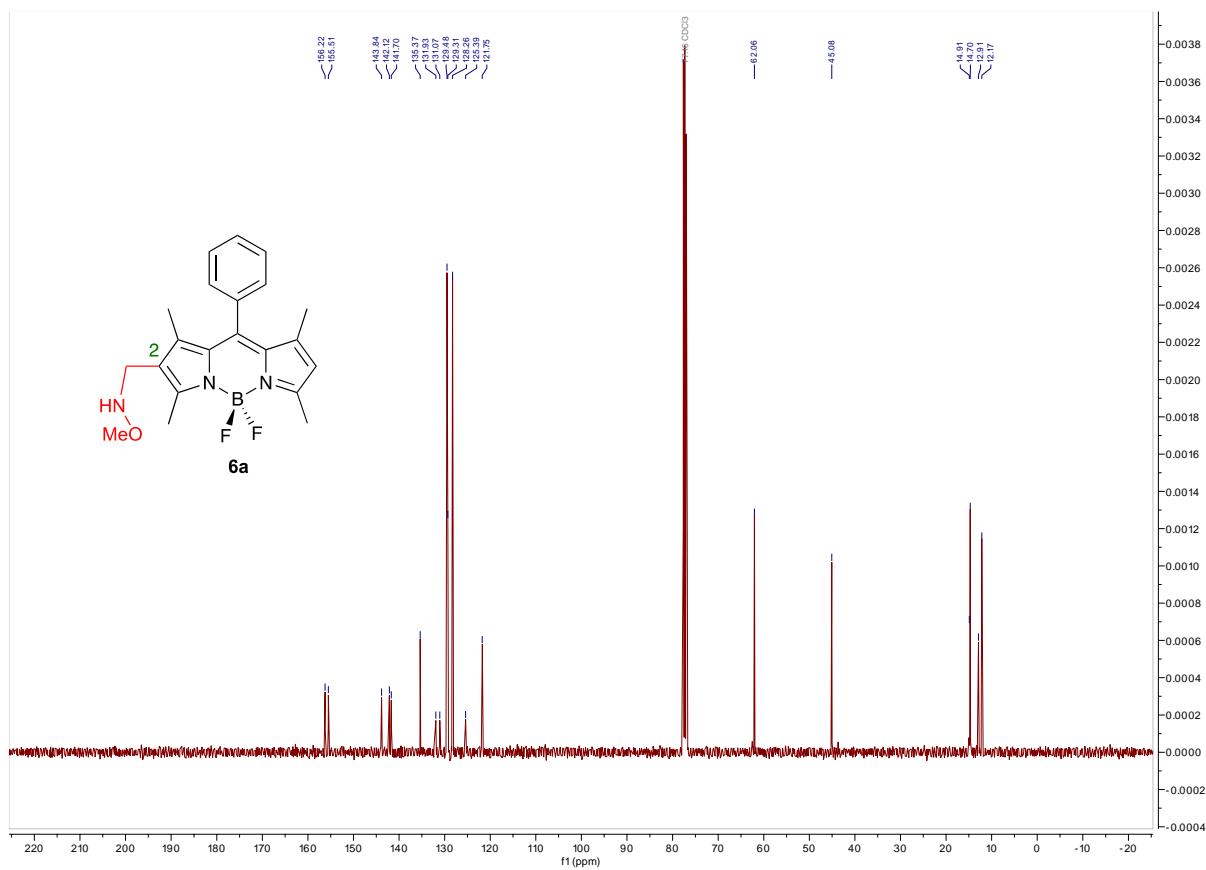

**Fig S10.** <sup>13</sup>C{<sup>1</sup>H} NMR (101 MHz, CDCl<sub>3</sub>) of **6a**

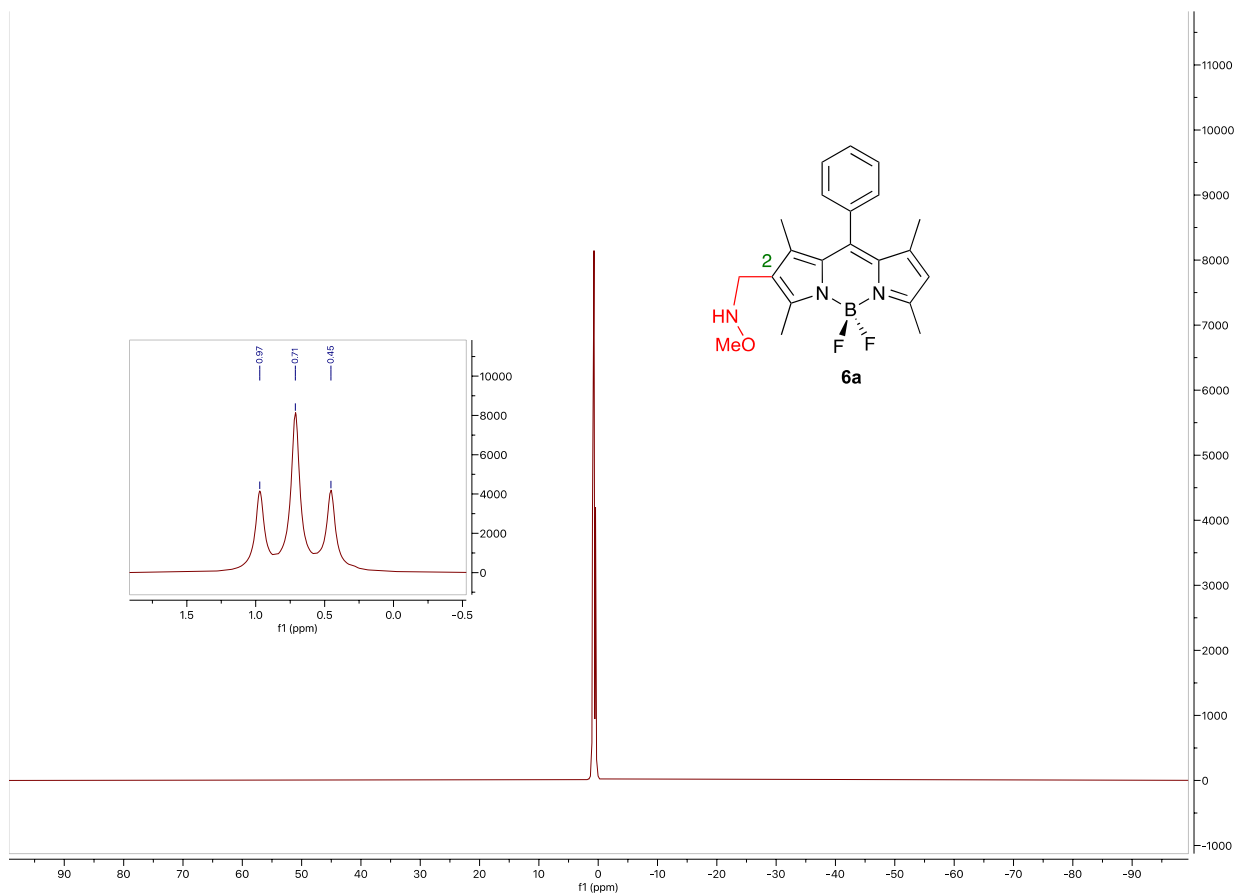

**Fig S11.**  $^{11}\text{B}$ -NMR (128 MHz,  $\text{CDCl}_3$ ) for **6a**

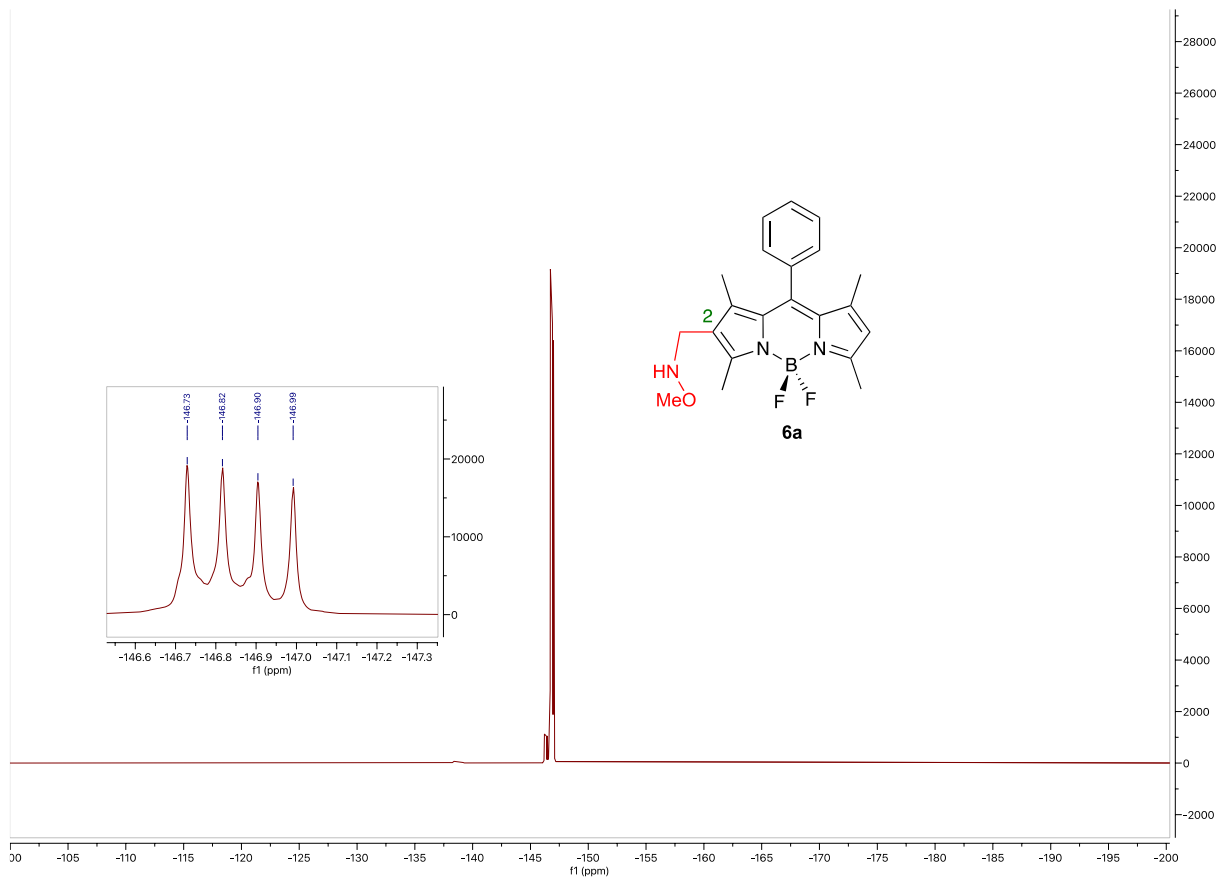

**Fig S12.**  $^{19}\text{F}$ -NMR (376 MHz,  $\text{CDCl}_3$ ) for **6a**

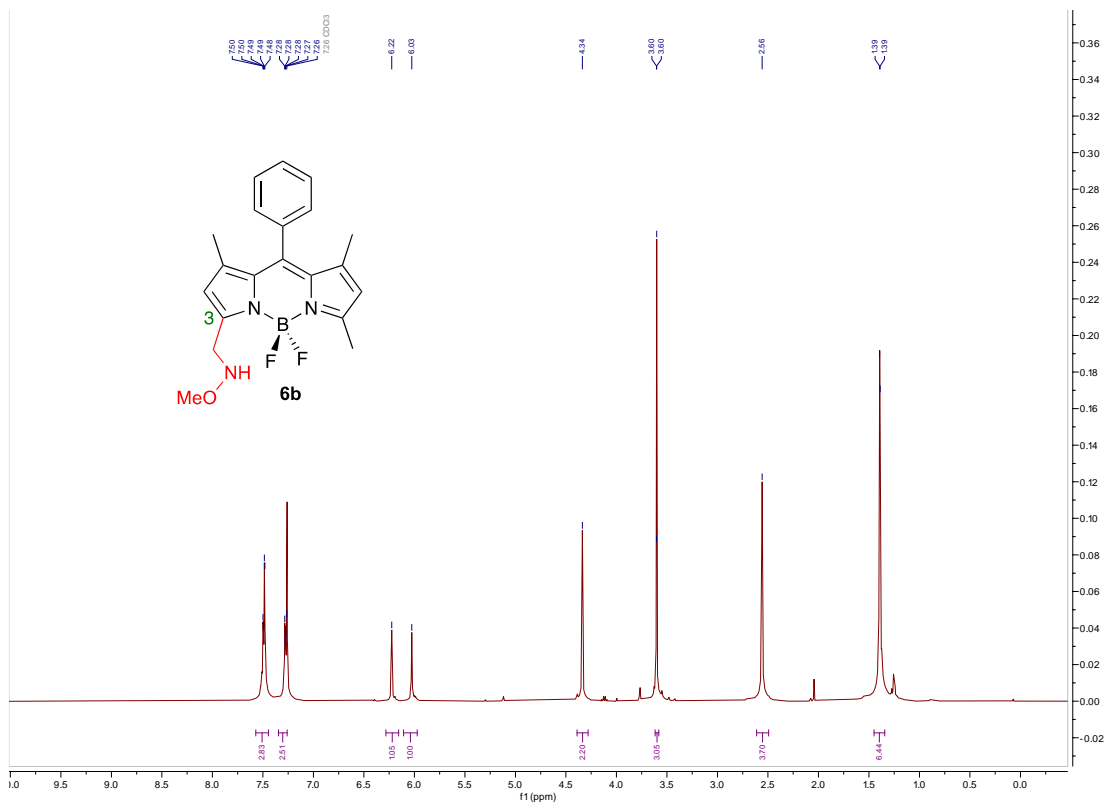

**Fig S13.** <sup>1</sup>H-NMR (400 MHz, CDCl<sub>3</sub>) for **6b**

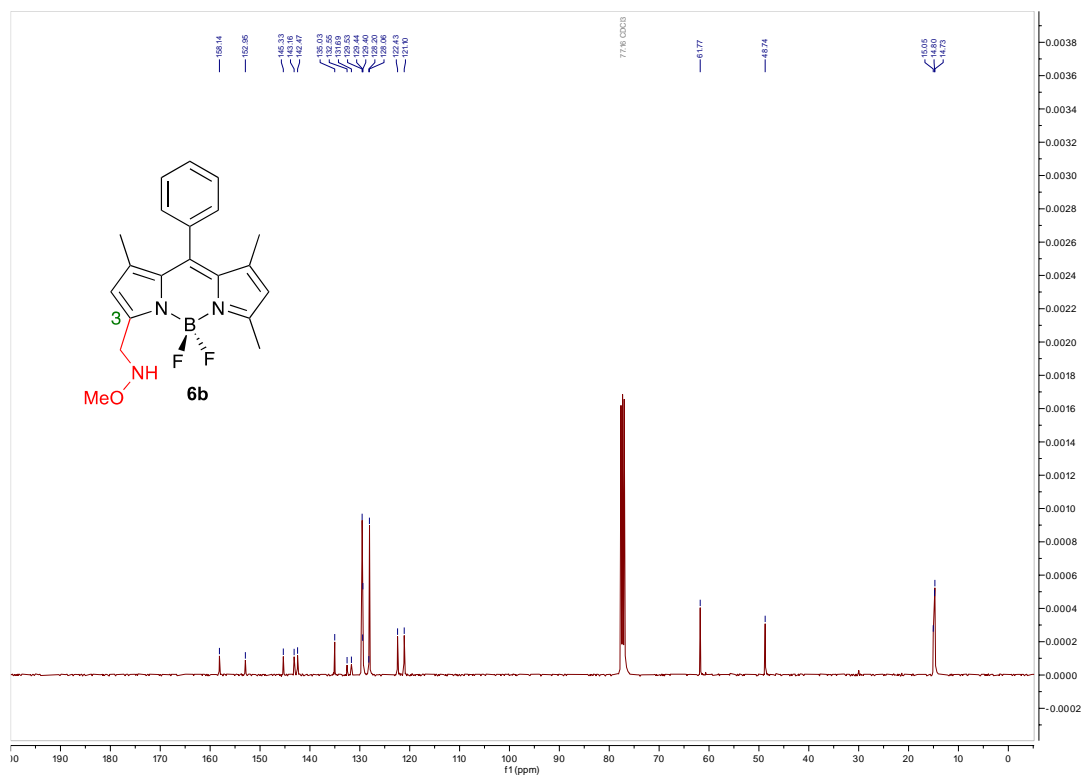

**Fig S14.** <sup>13</sup>C{<sup>1</sup>H} NMR (101 MHz, CDCl<sub>3</sub>) of **6b**

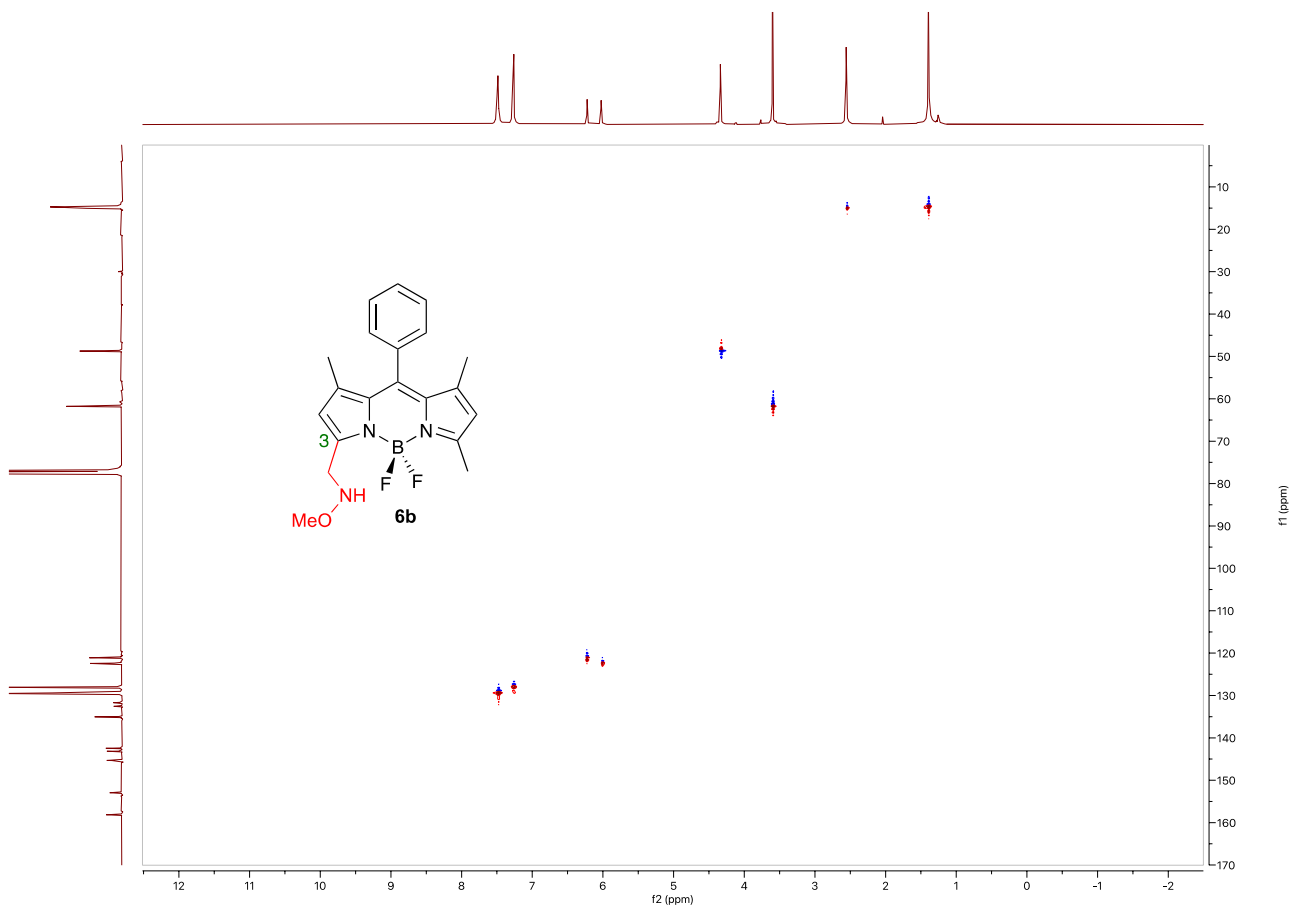

**Fig S15.** HSQC spectra for **9b**

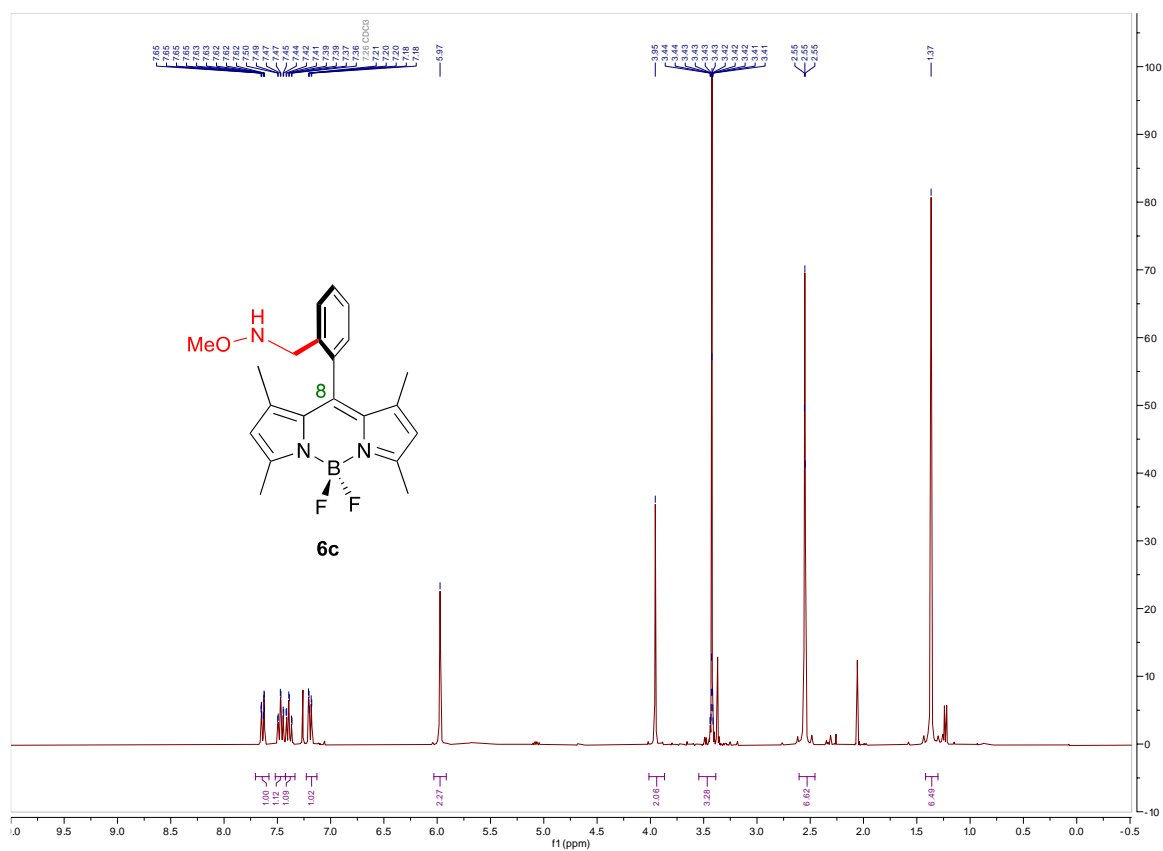

**Fig S16.**  $^1\text{H-NMR}$  (400 MHz,  $\text{CDCl}_3$ ) for **6c**



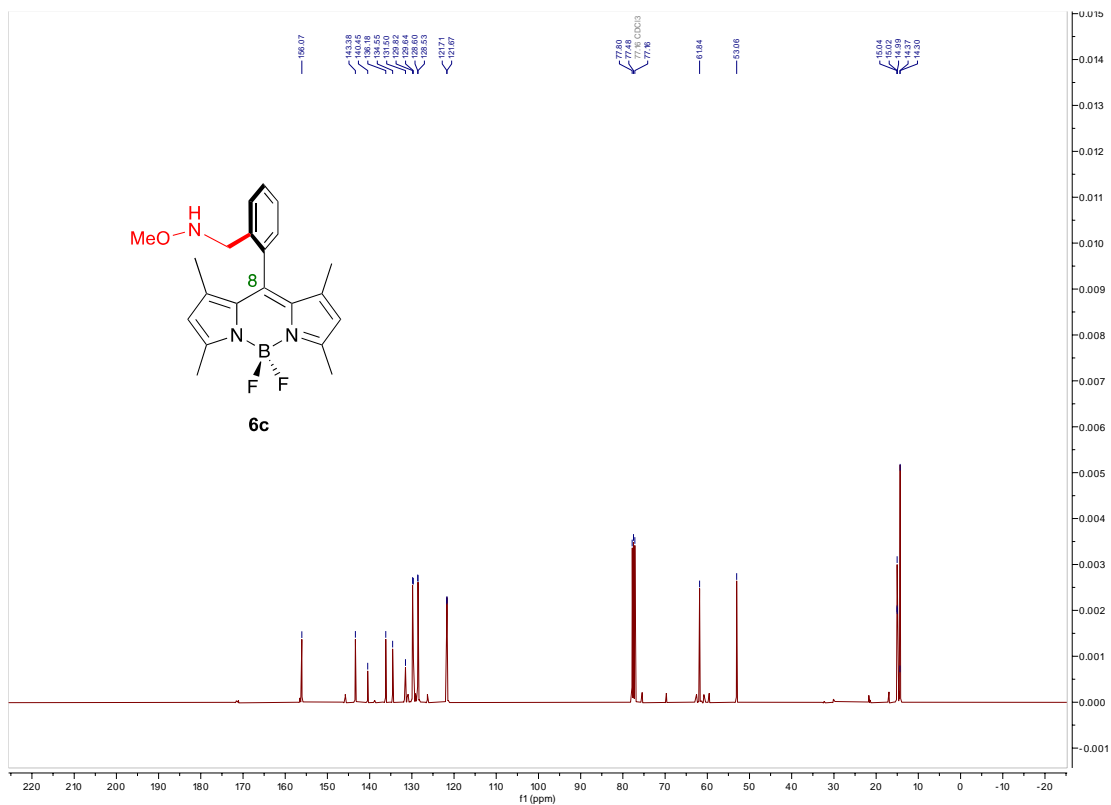

**Fig S17.**  $^{13}\text{C}\{^1\text{H}\}$  NMR (101 MHz,  $\text{CDCl}_3$ ) of **6c**

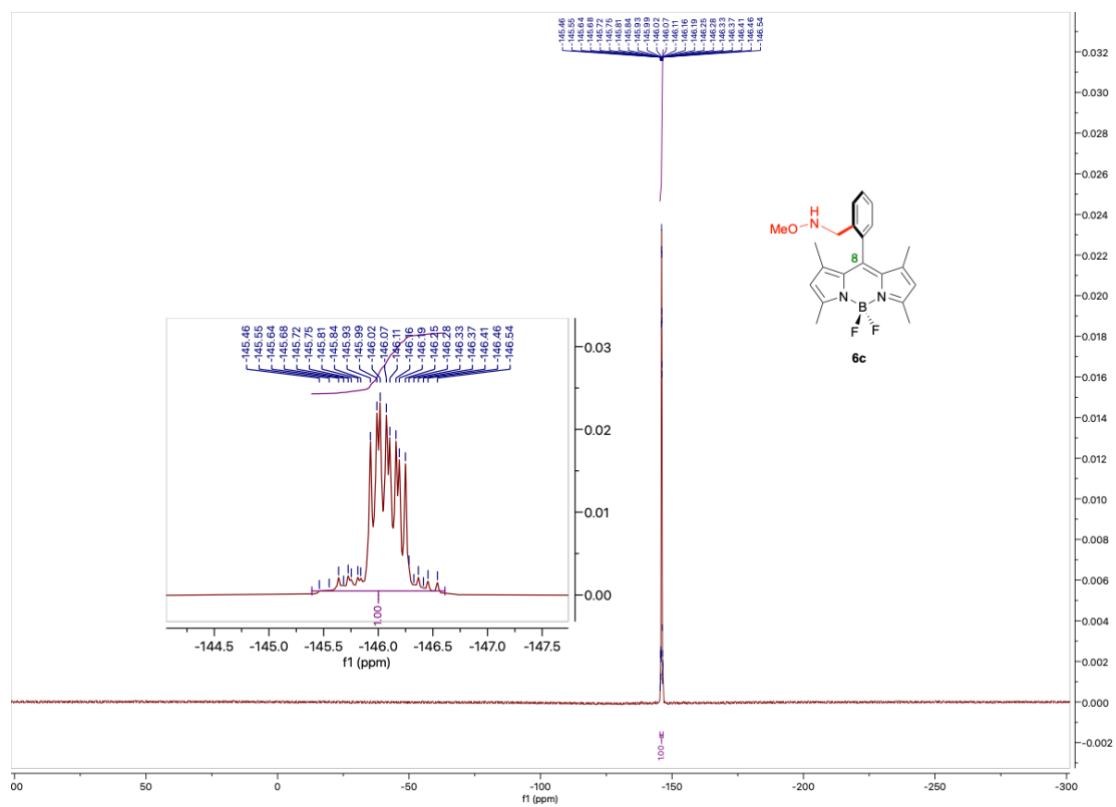

**Fig S18.**  $^{19}\text{F}$ -NMR (376 MHz,  $\text{CDCl}_3$ ) for **6c**

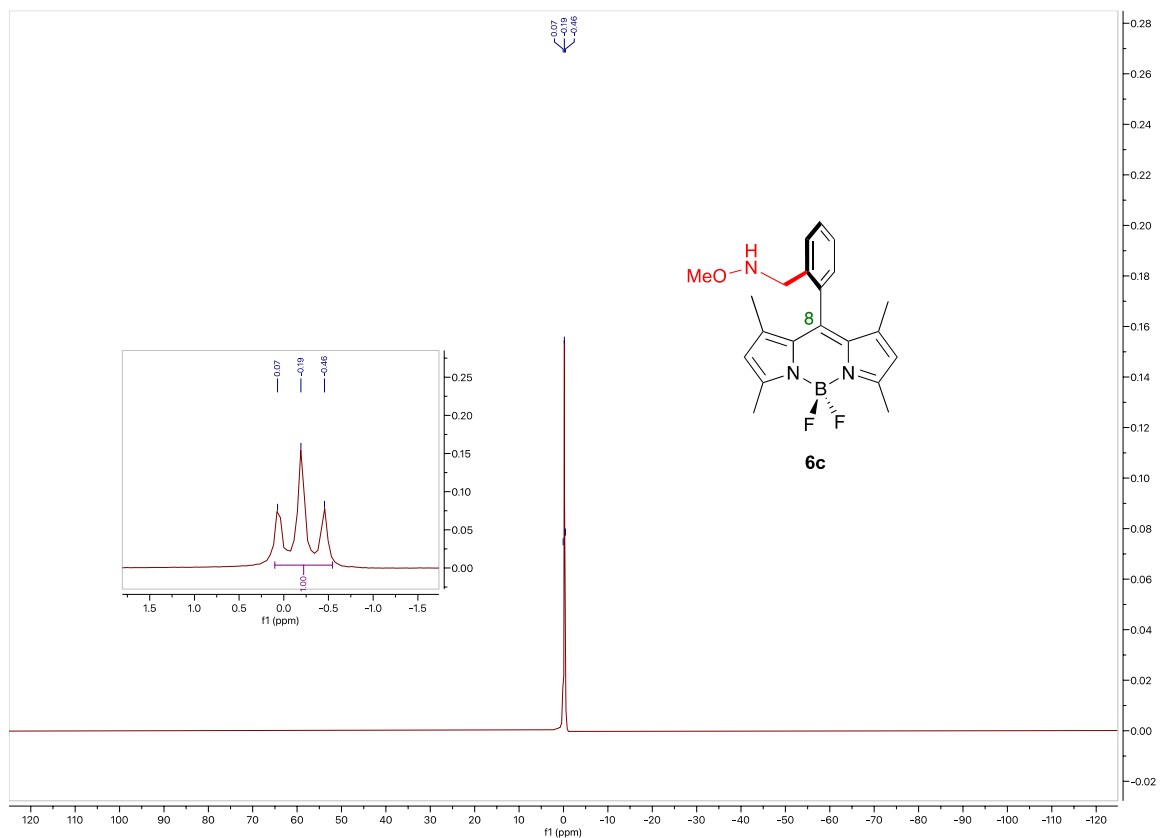

**Fig S19.**  $^{11}\text{B}$ -NMR (128 MHz,  $\text{CDCl}_3$ ) for **6c**

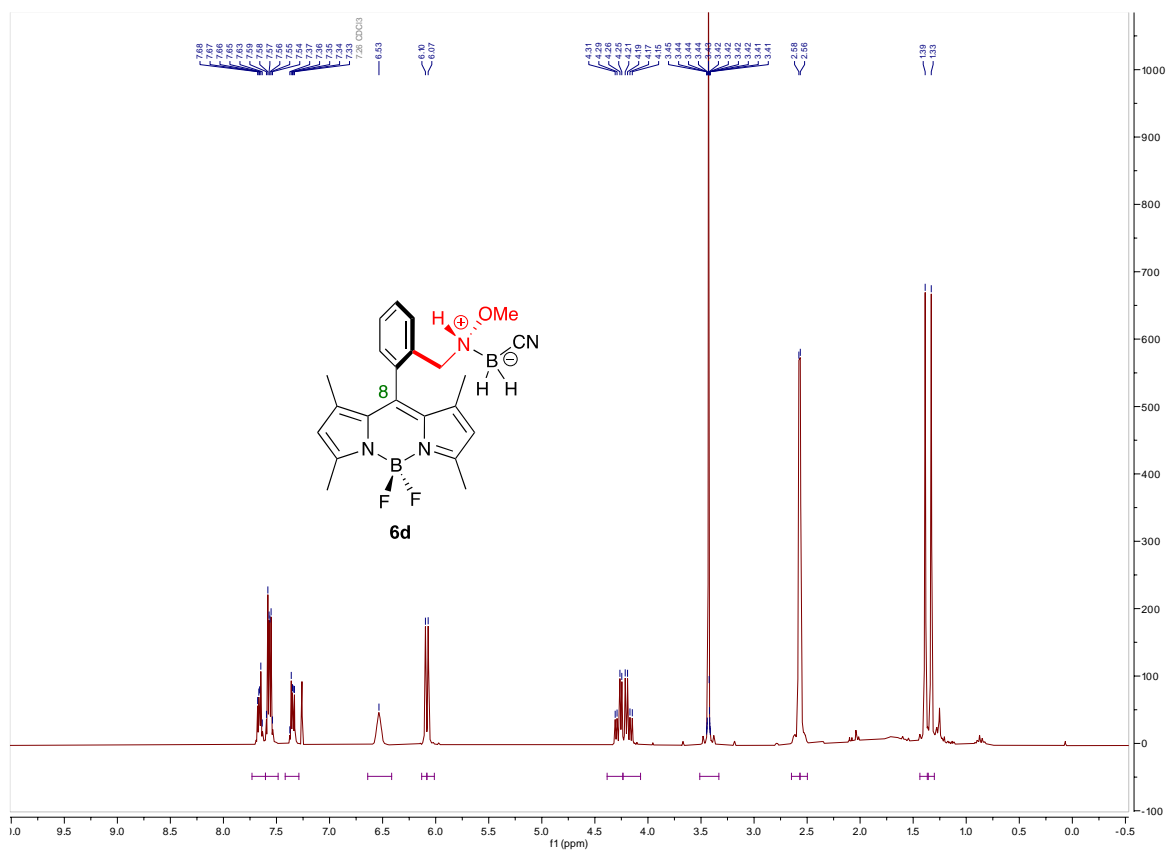

**Fig S20.**  $^1\text{H}$ -NMR (300 MHz,  $\text{CDCl}_3$ ) for **6d**

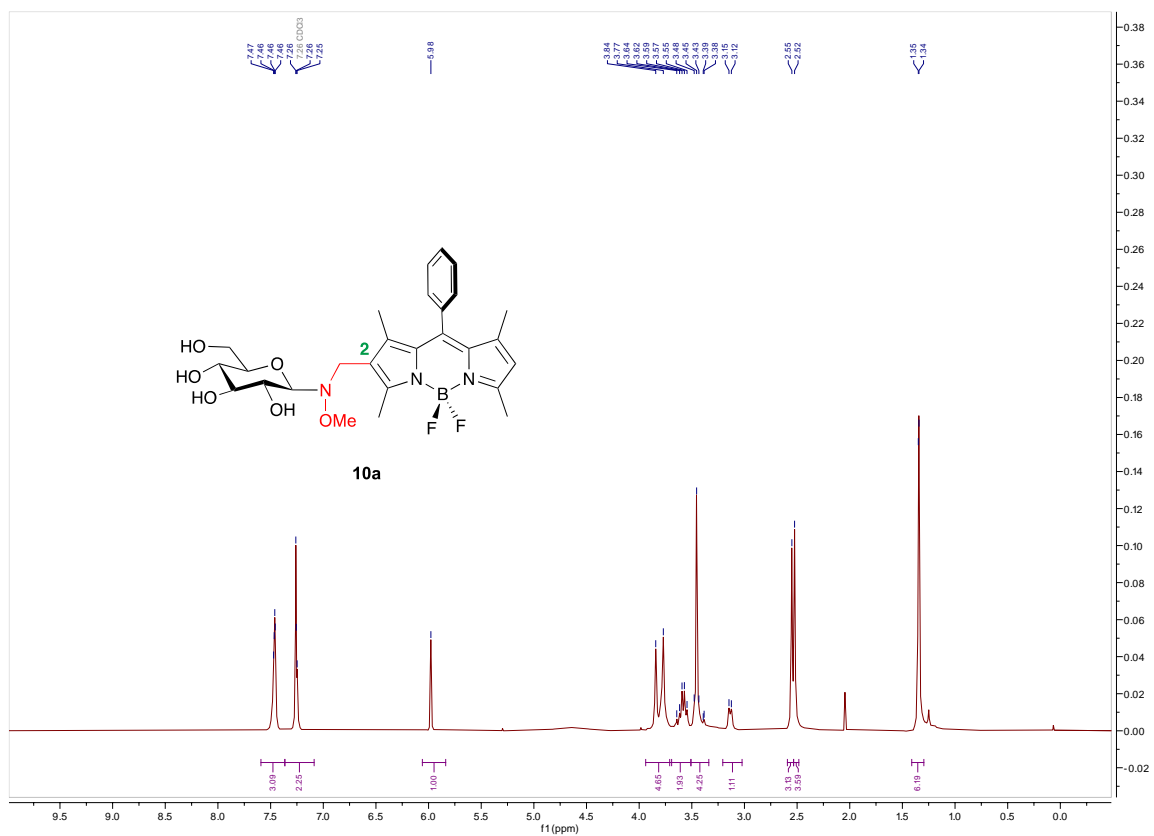

**Fig S21.** <sup>1</sup>H-NMR (400 MHz, CDCl<sub>3</sub>) for **10a**

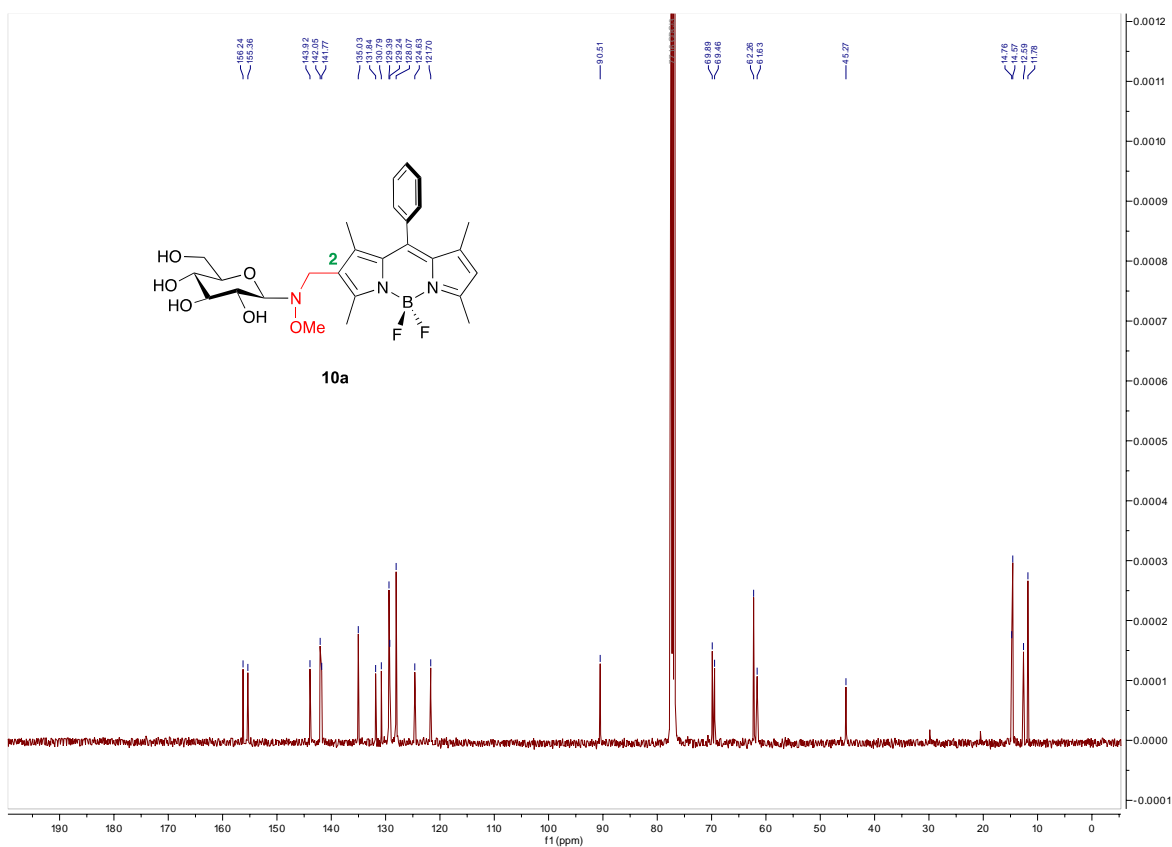

**Fig S22.** <sup>13</sup>C{<sup>1</sup>H} NMR (101 MHz, CDCl<sub>3</sub>) of **10a**

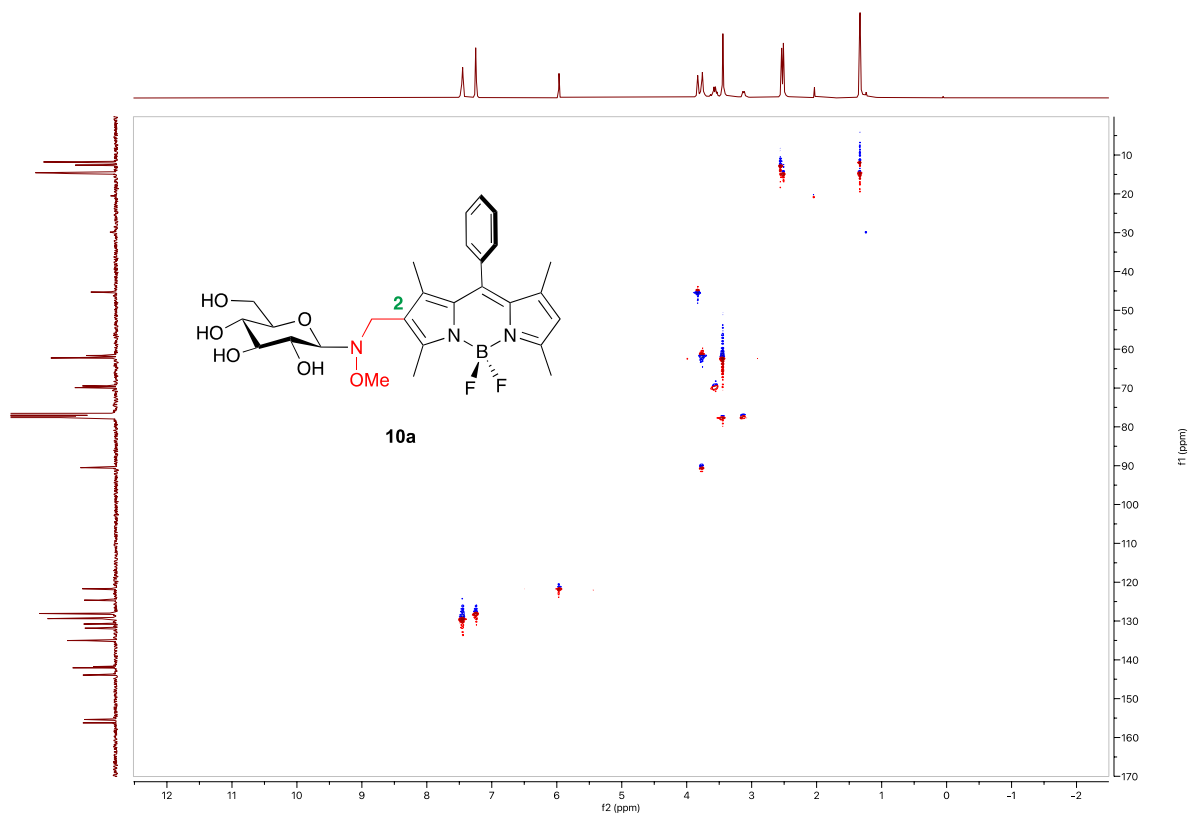

Fig S23. HSQC spectra for **9b**

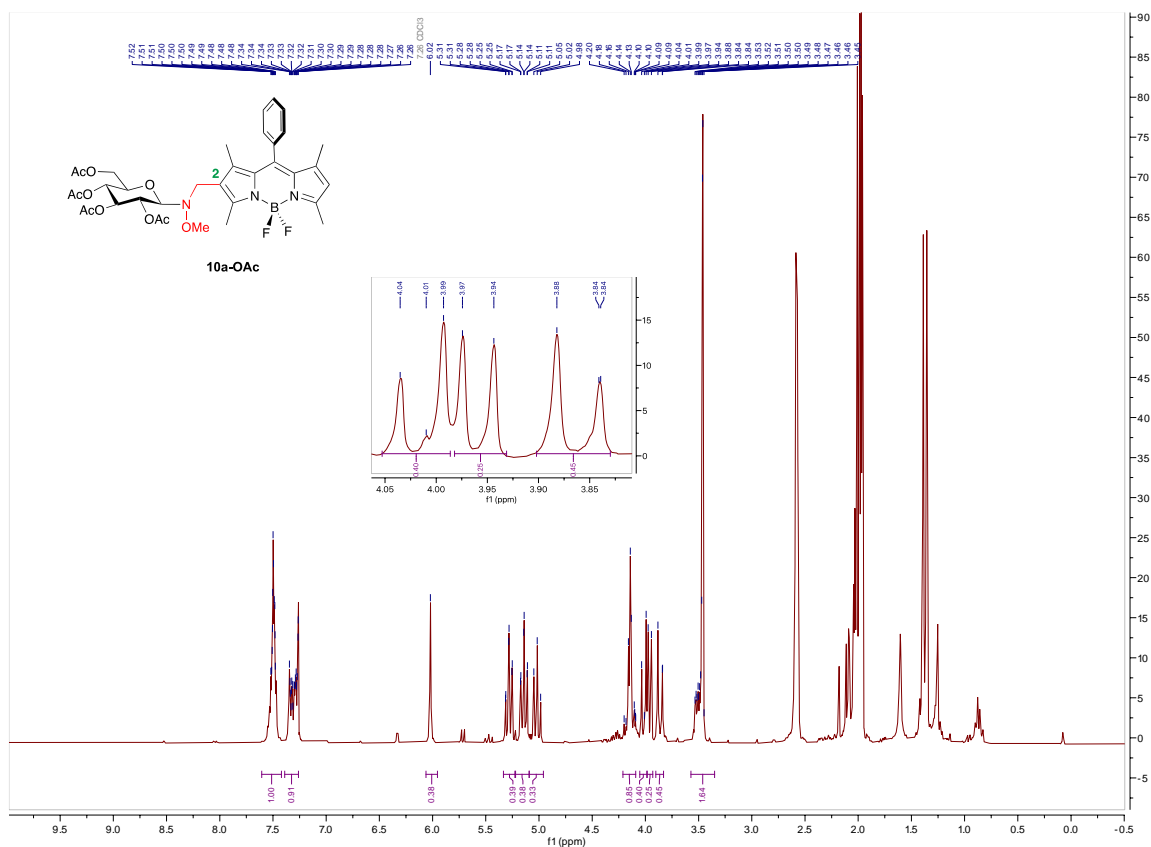

Fig S24.  $^1\text{H-NMR}$  (400 MHz,  $\text{CDCl}_3$ ) for **10a-OAc**



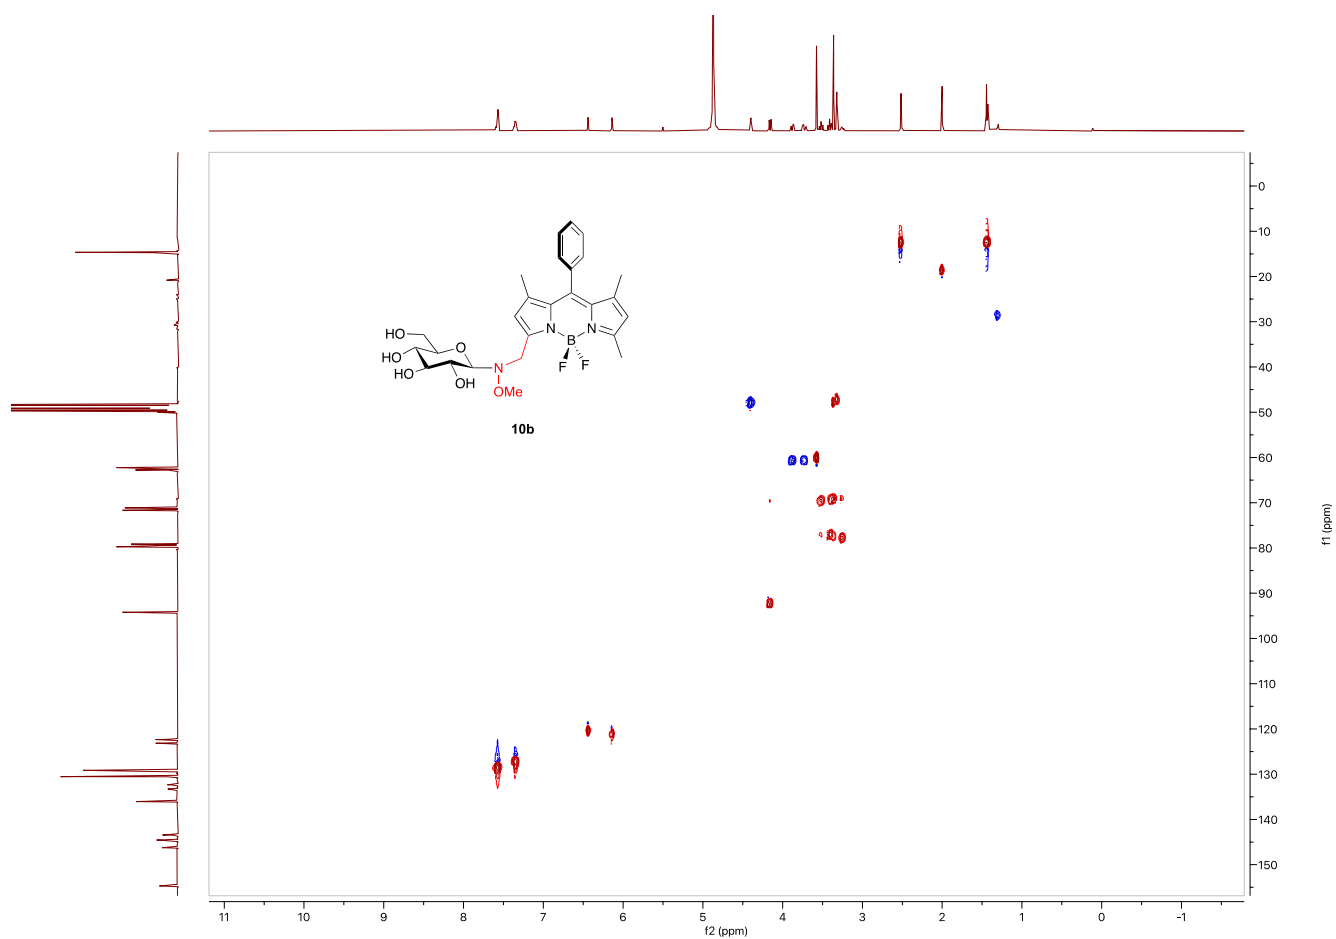

**Fig S27.** HSQC spectra for **10b**

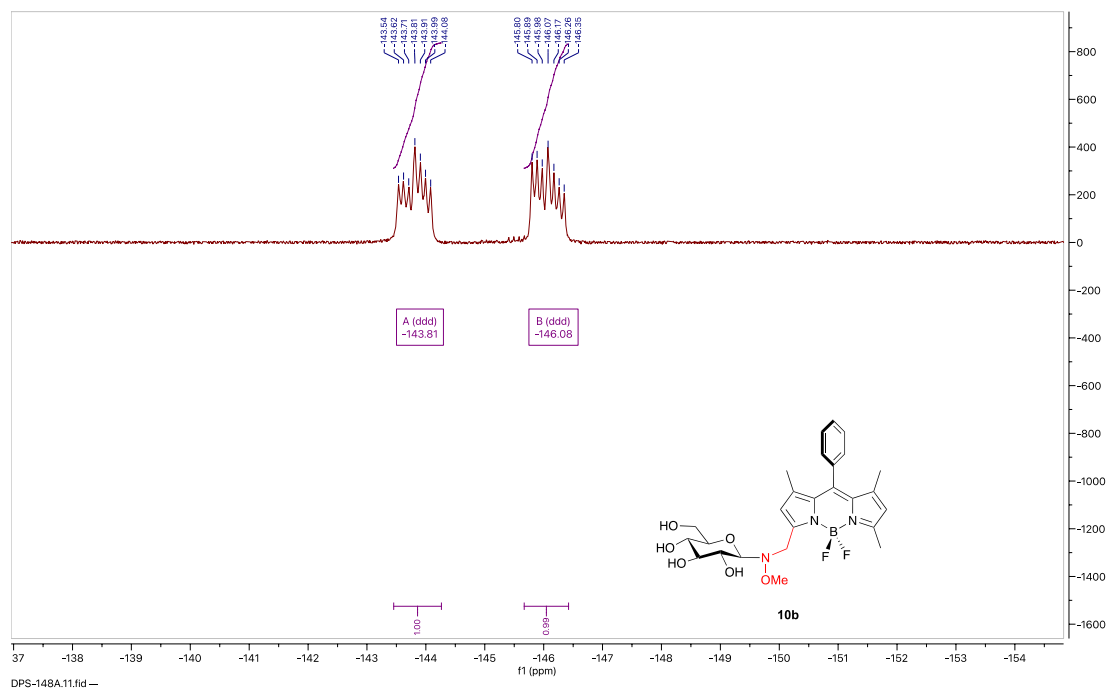

**Fig S28.**  $^{19}\text{F}$ -NMR (376 MHz,  $\text{CDCl}_3$ ) for **10b**

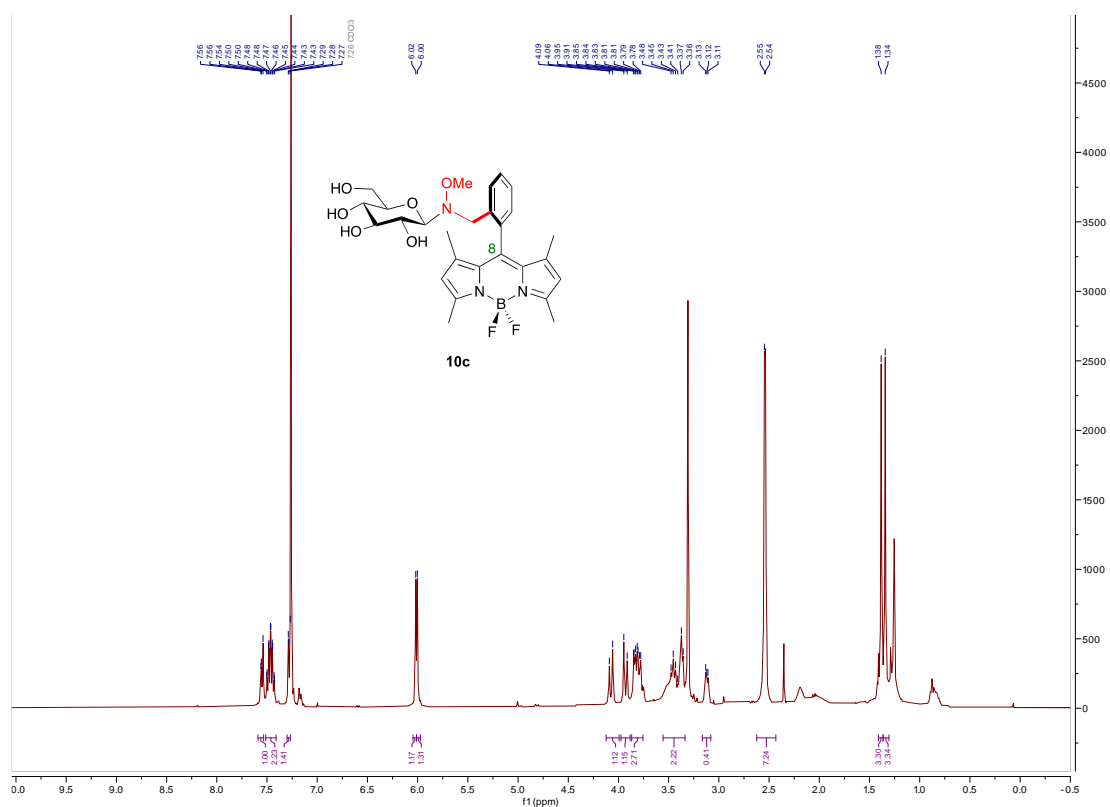

**Fig S29.**  $^1\text{H-NMR}$  (400 MHz,  $\text{CDCl}_3$ ) for **10c**

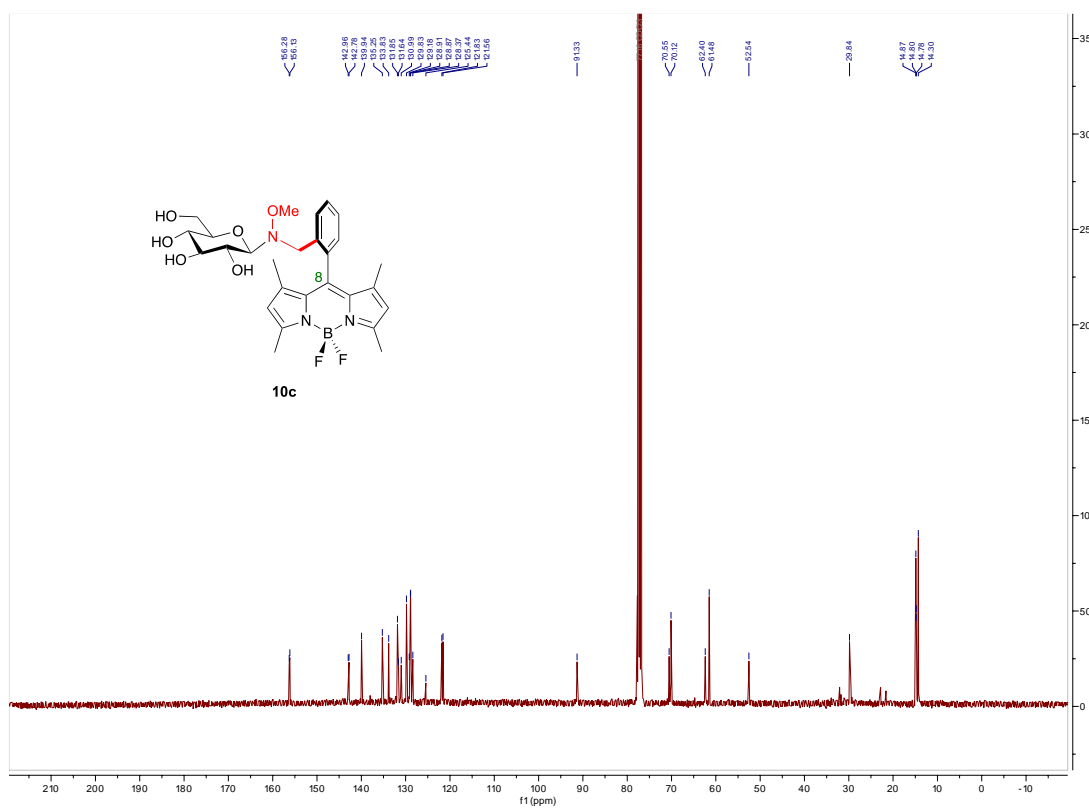

**Fig S30.**  $^{13}\text{C}\{^1\text{H}\}$  NMR (101 MHz,  $\text{CDCl}_3$ ) of **10c**

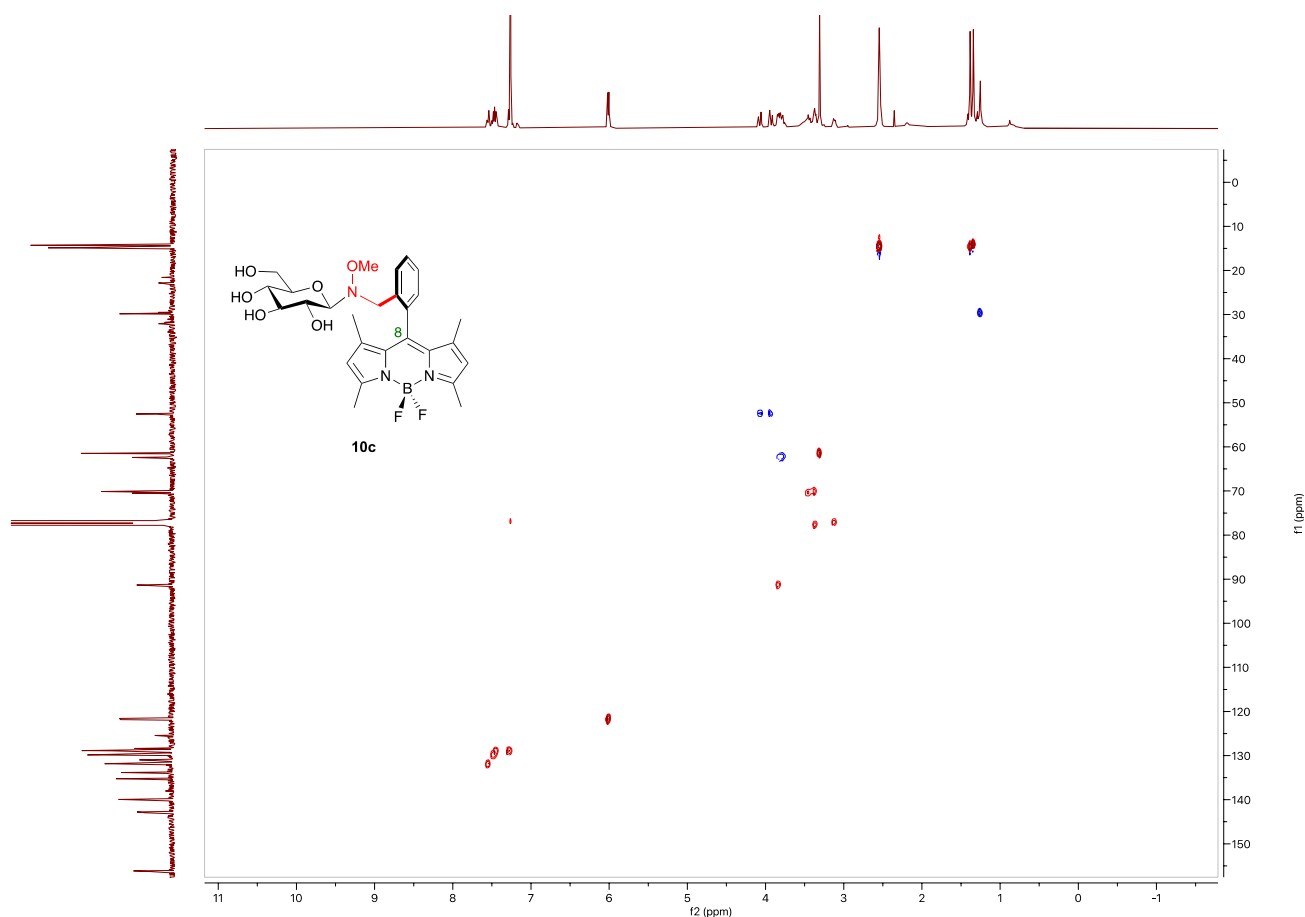

**Fig S31.** HSQC spectra for **10c**

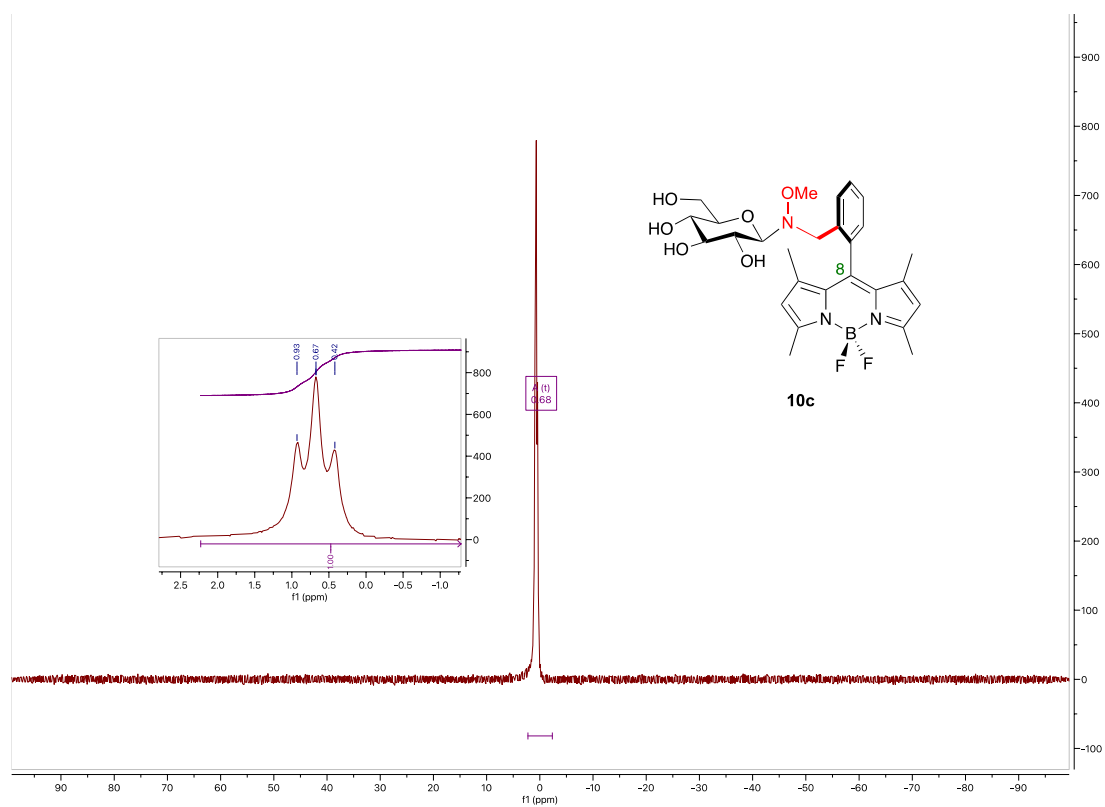

**Fig S32.**  $^{11}\text{B}$ -NMR (128 MHz,  $\text{CDCl}_3$ ) for **10c**







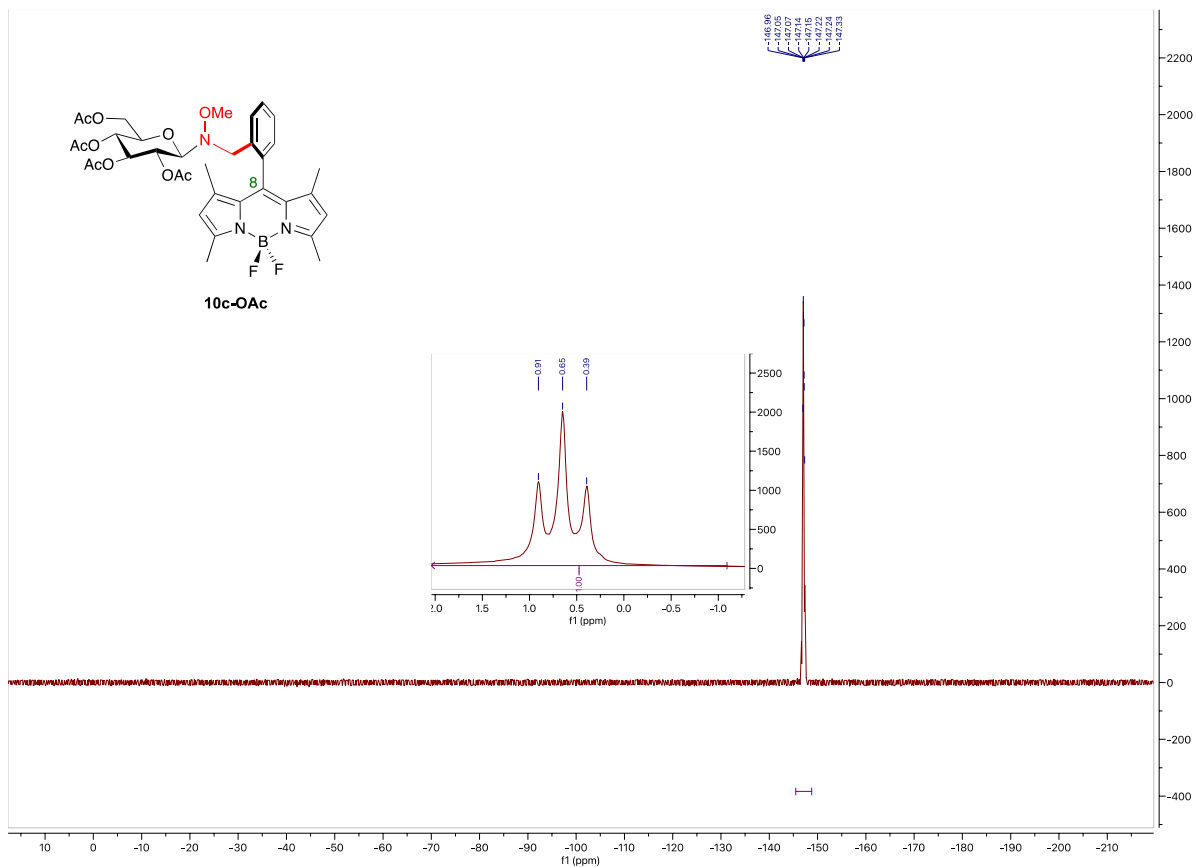

**Fig S37.**  $^{19}\text{F}$ -NMR (376 MHz,  $\text{CDCl}_3$ ) for **10c-OAc**

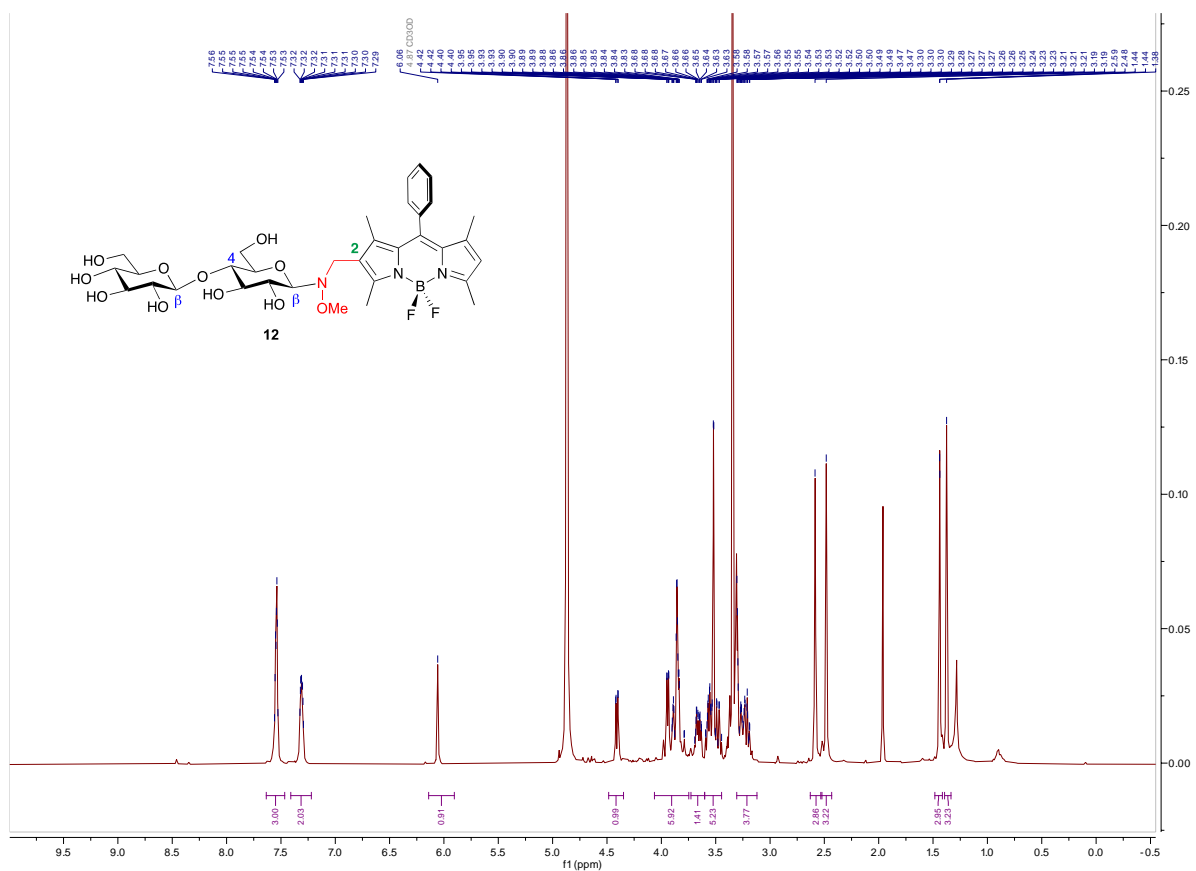

**Fig S38.**  $^1\text{H}$ -NMR (400 MHz,  $\text{CD}_3\text{OD}_3$ ) for **12**

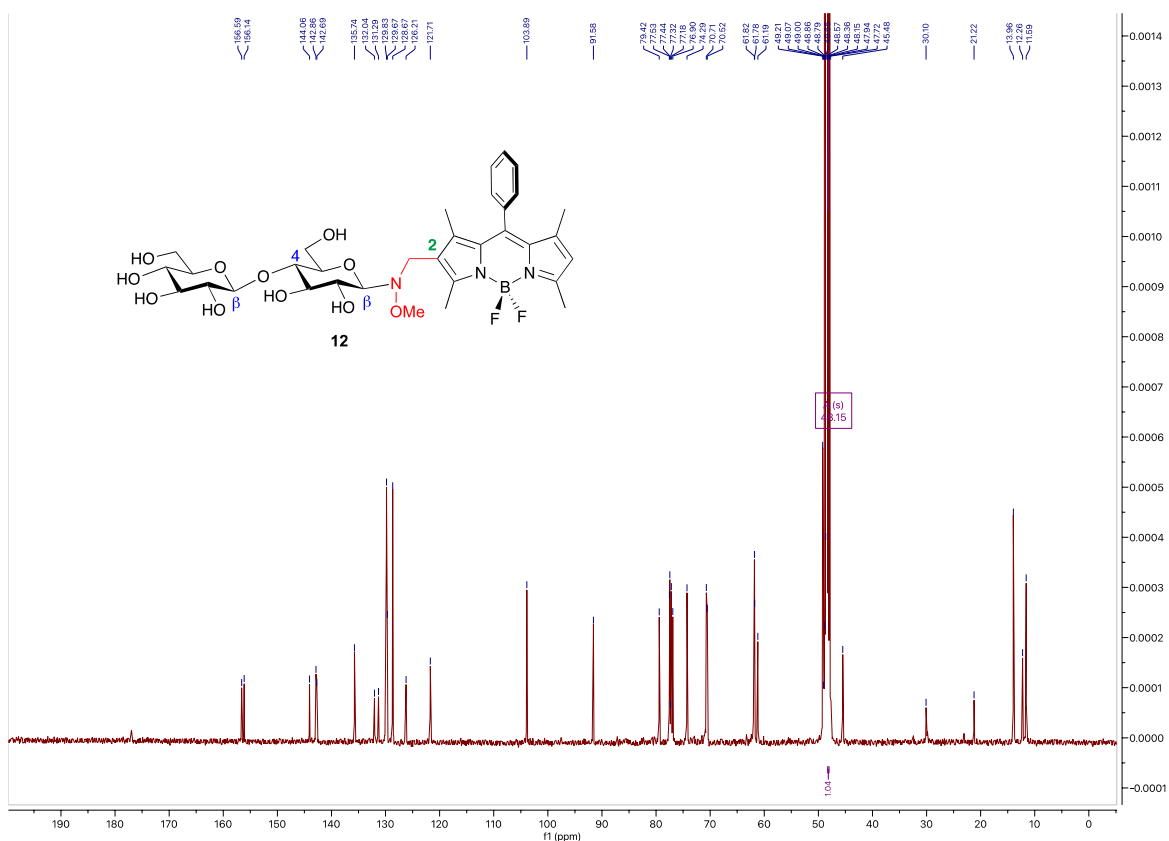

**Fig S39**  $^{13}\text{C}\{^1\text{H}\}$  NMR (101 MHz,  $\text{CD}_3\text{OD}$ ) of **12**

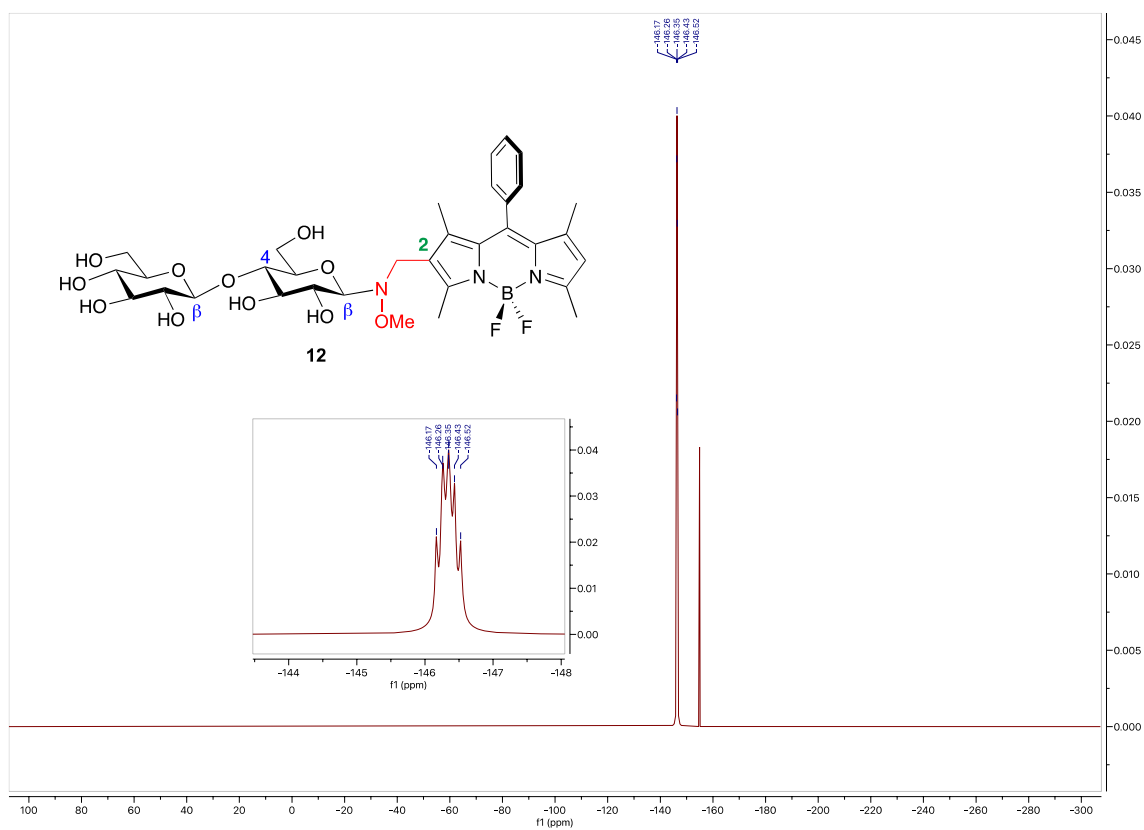

**Fig S40**  $^{19}\text{F}$ -NMR (376 MHz,  $\text{CD}_3\text{OD}$ ) of **12**

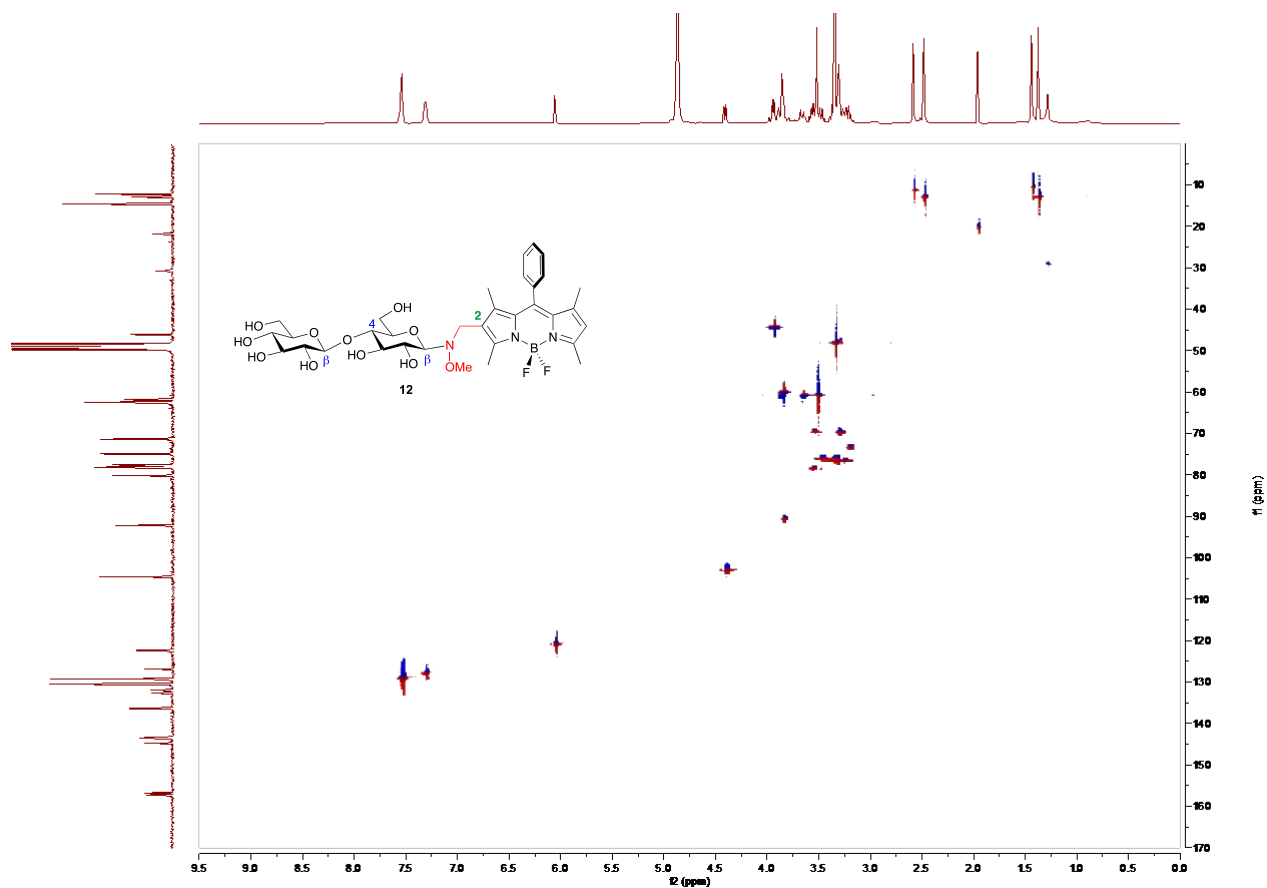

Fig S41. HSQC of 12

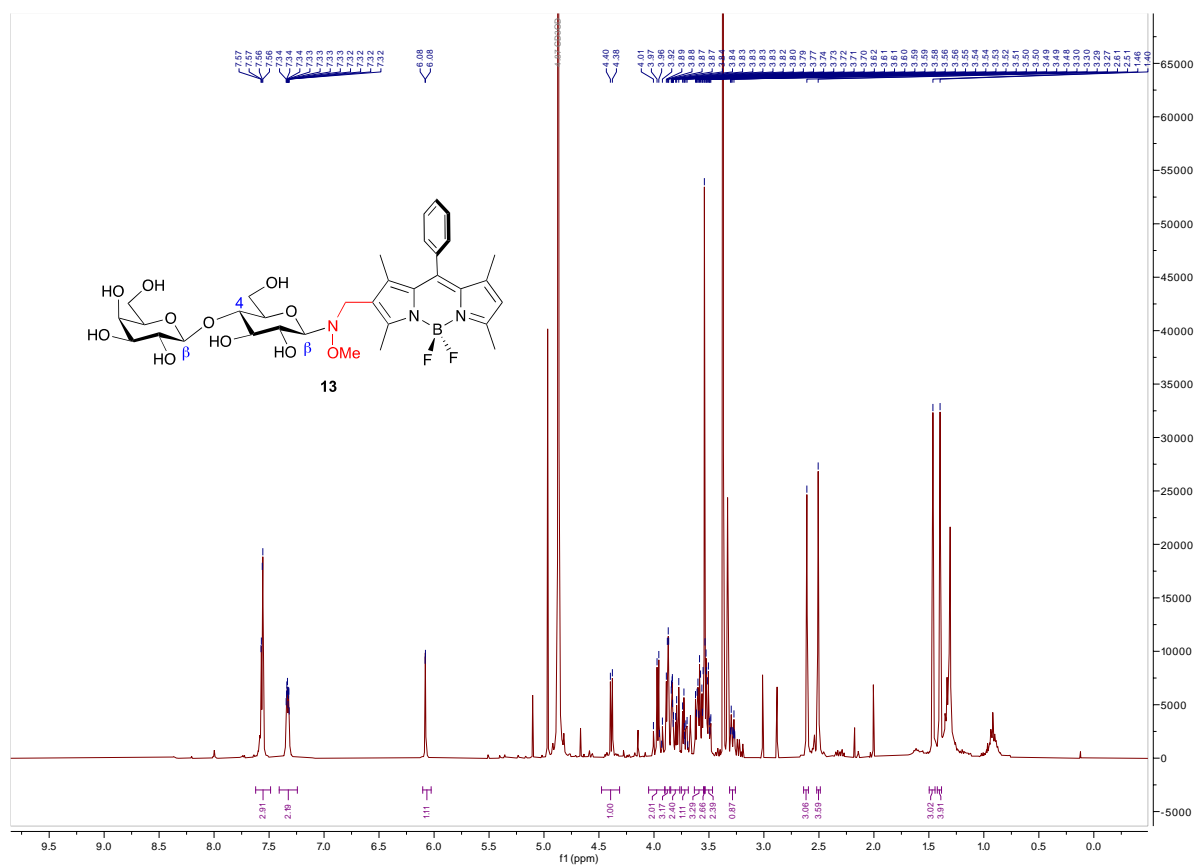

Fig S42.  $^1\text{H-NMR}$  (400 MHz,  $\text{CD}_3\text{OD}_3$ ) for 13



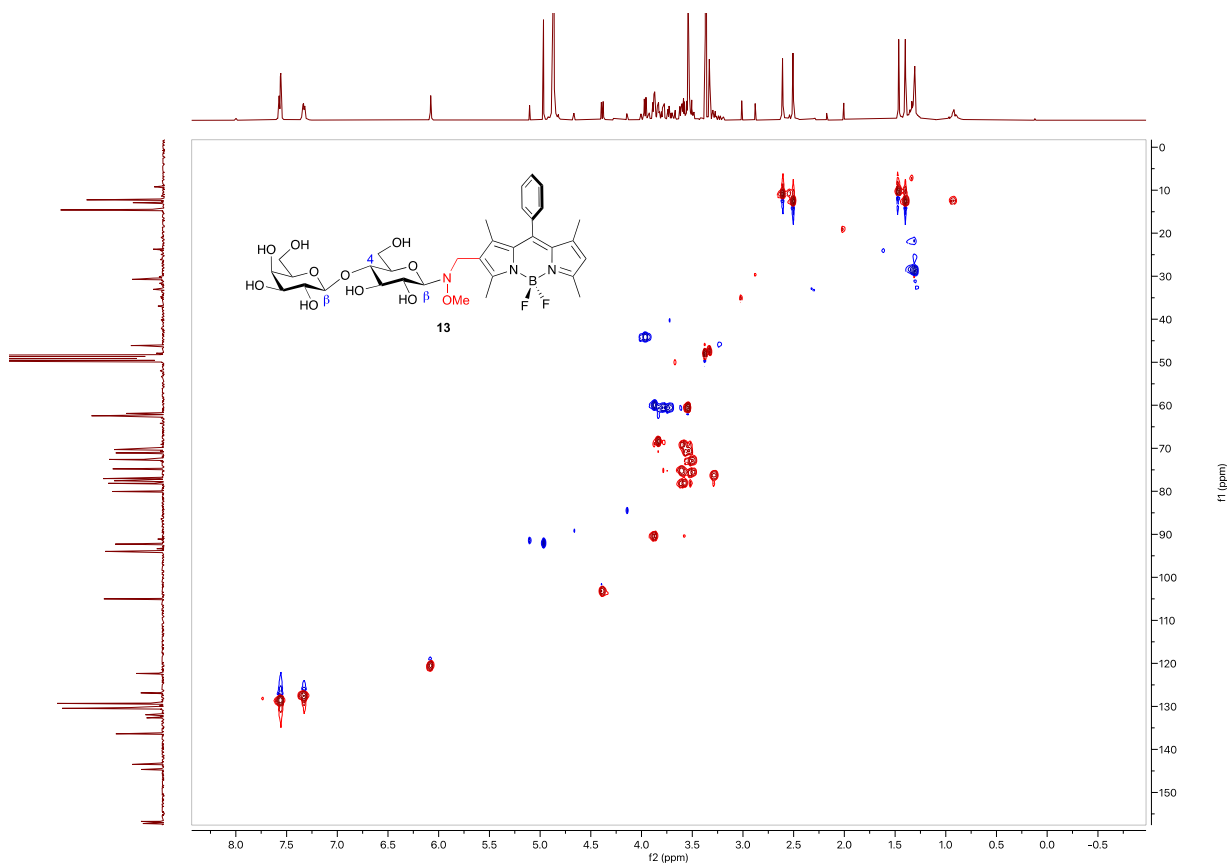

Fig S45. HSQC of 12

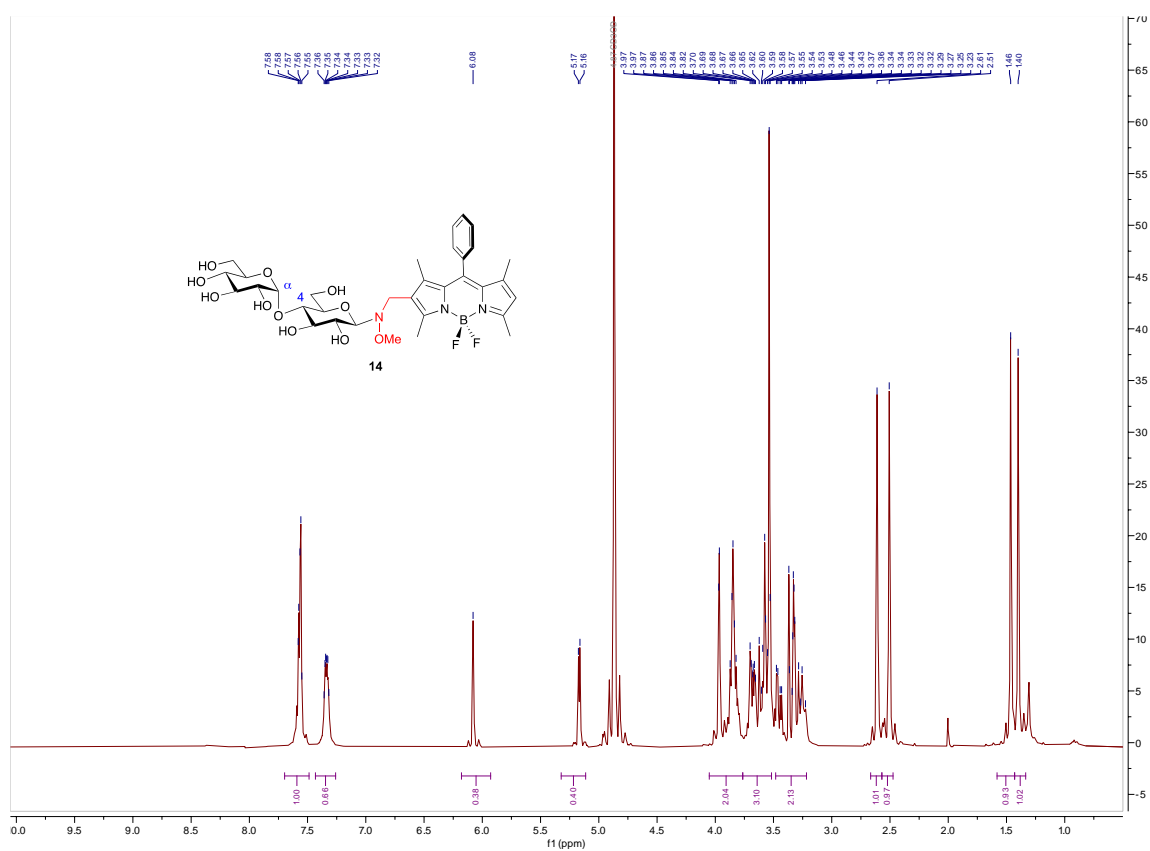

Fig S46.  $^1\text{H-NMR}$  (400 MHz,  $\text{CD}_3\text{OD}_3$ ) for 14

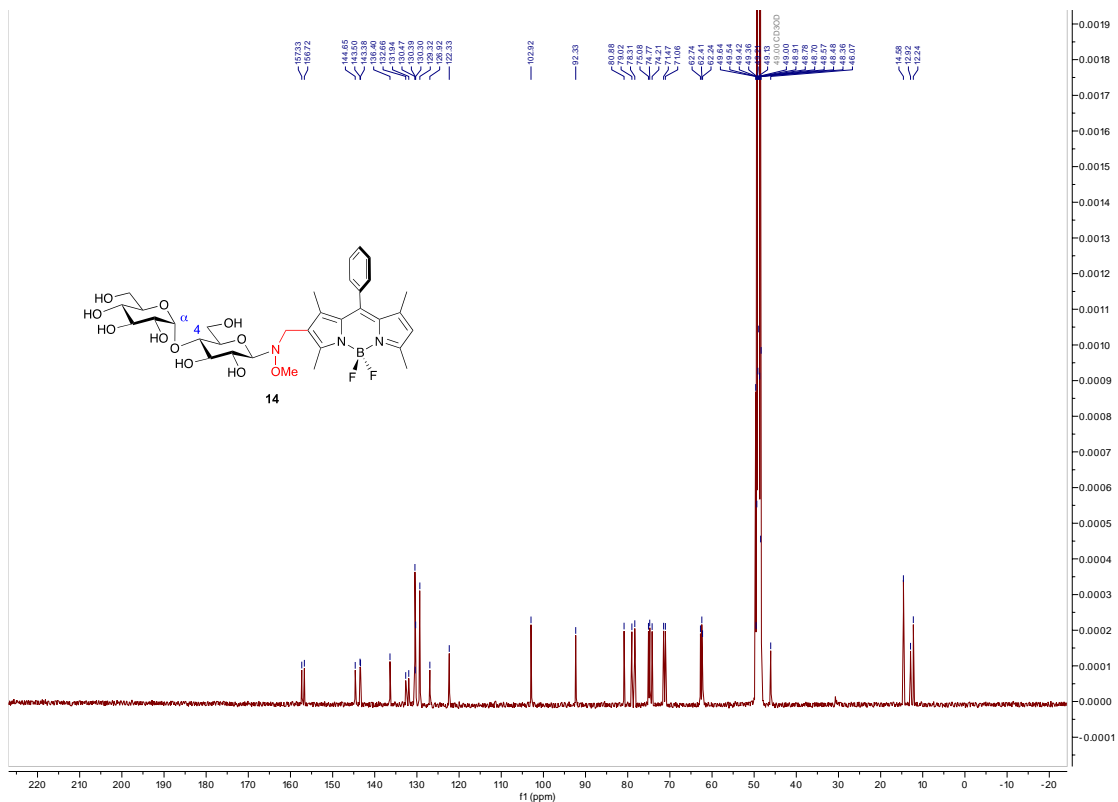

Fig S47  $^{13}\text{C}\{^1\text{H}\}$  NMR (101 MHz,  $\text{CD}_3\text{OD}$ ) of **14**

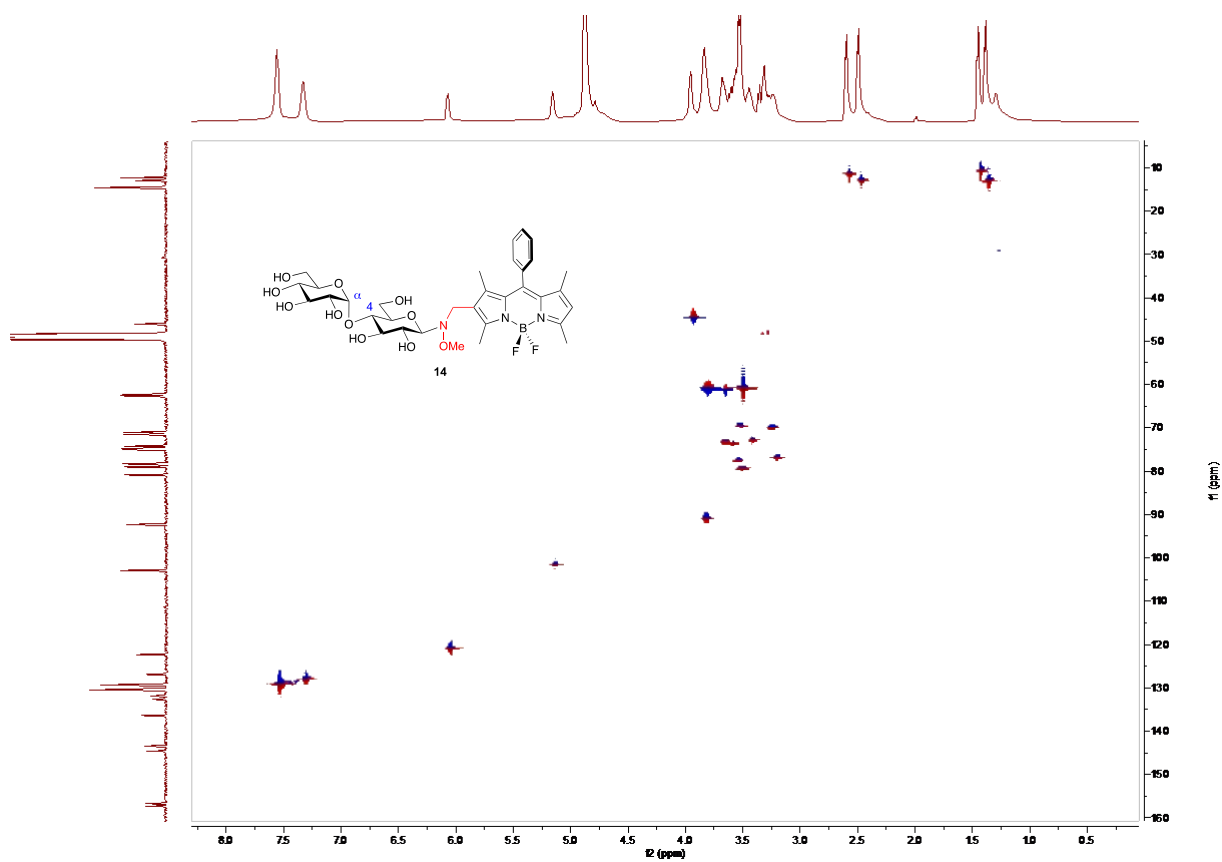

Fig S48. HSQC of **12**



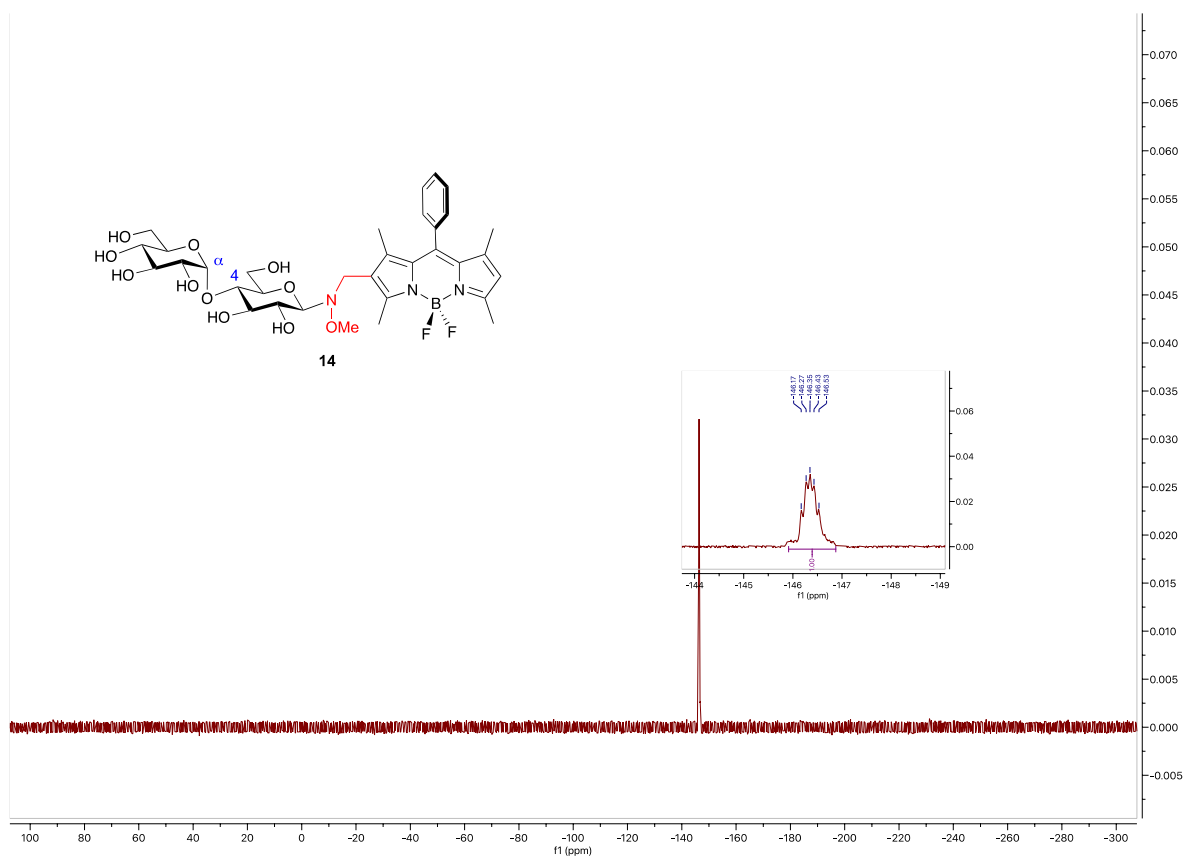

**Fig S49**  $^{19}\text{F}$ -NMR (376 MHz,  $\text{CD}_3\text{OD}$ ) of **14**

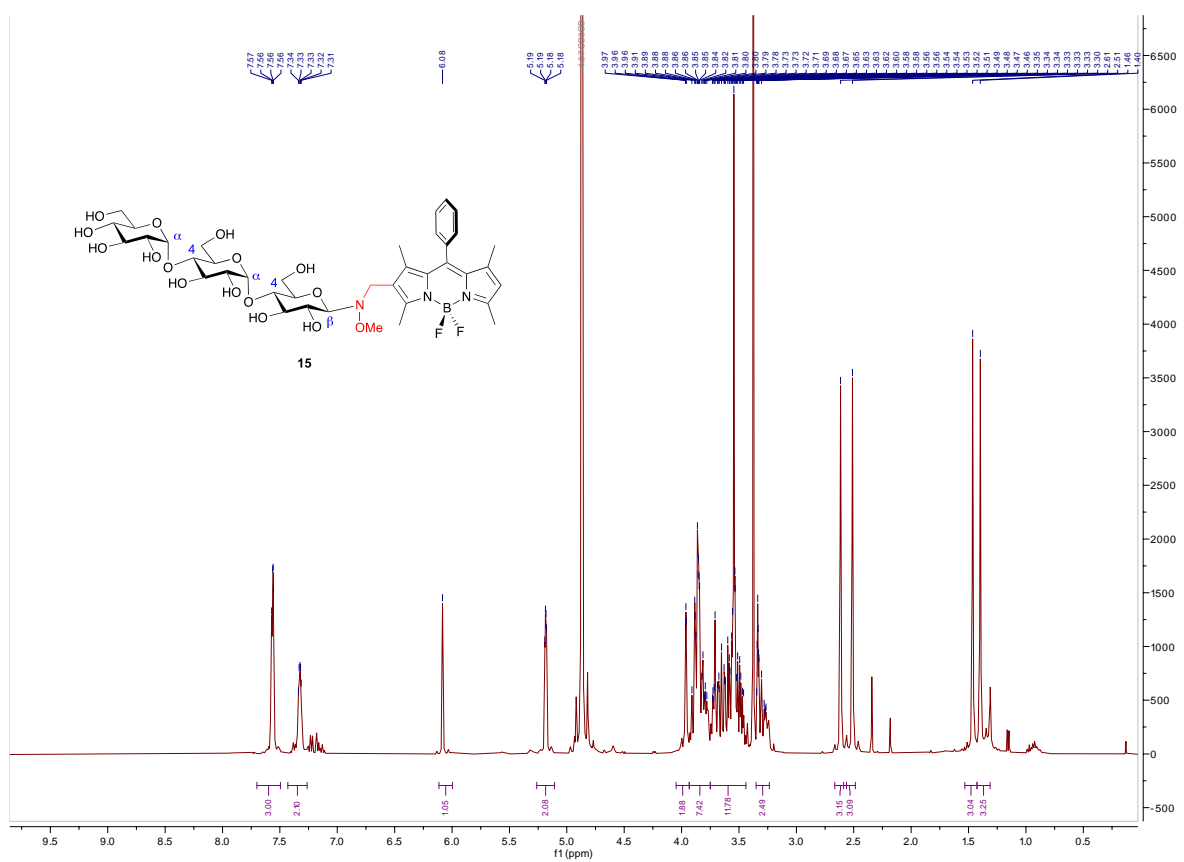

**Fig S50.**  $^1\text{H}$ -NMR (400 MHz,  $\text{CD}_3\text{OD}_3$ ) for **15**

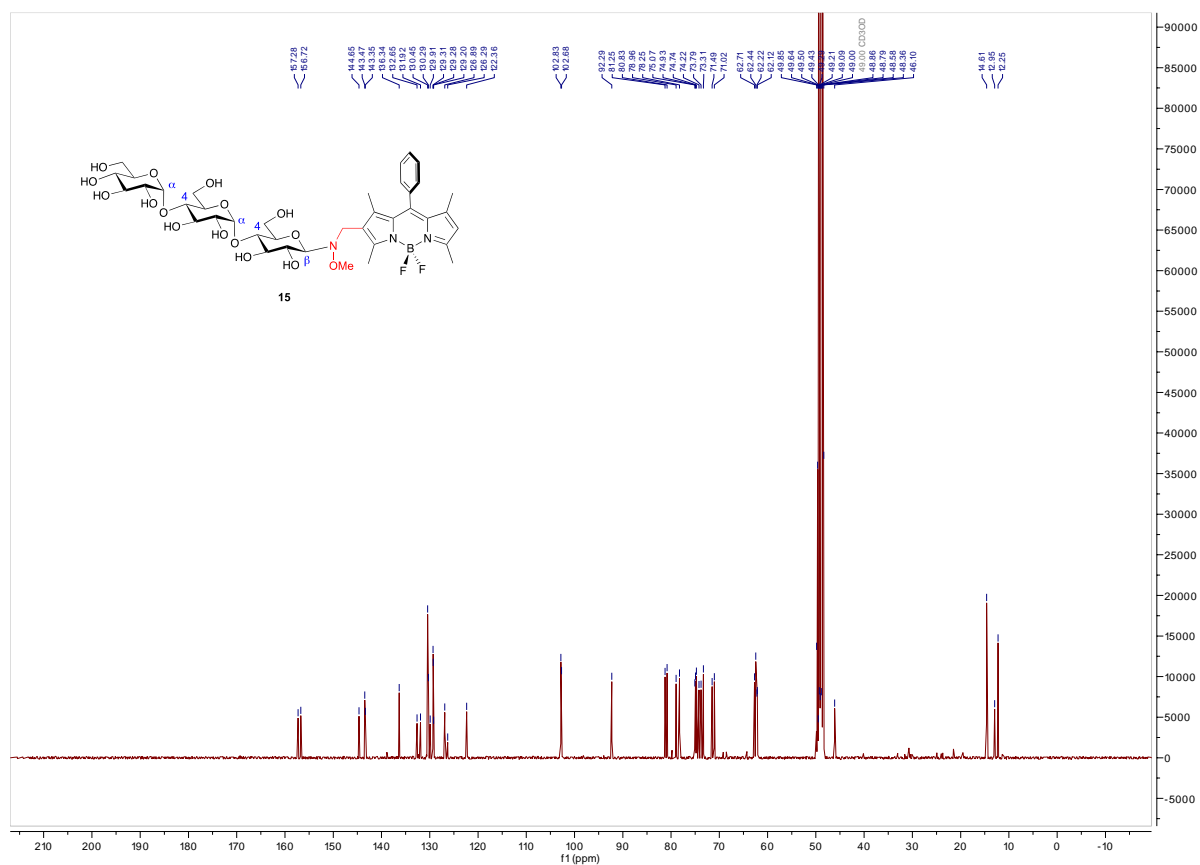

Fig S51  $^{13}\text{C}\{^1\text{H}\}$  NMR (101 MHz,  $\text{CD}_3\text{OD}$ ) of 15

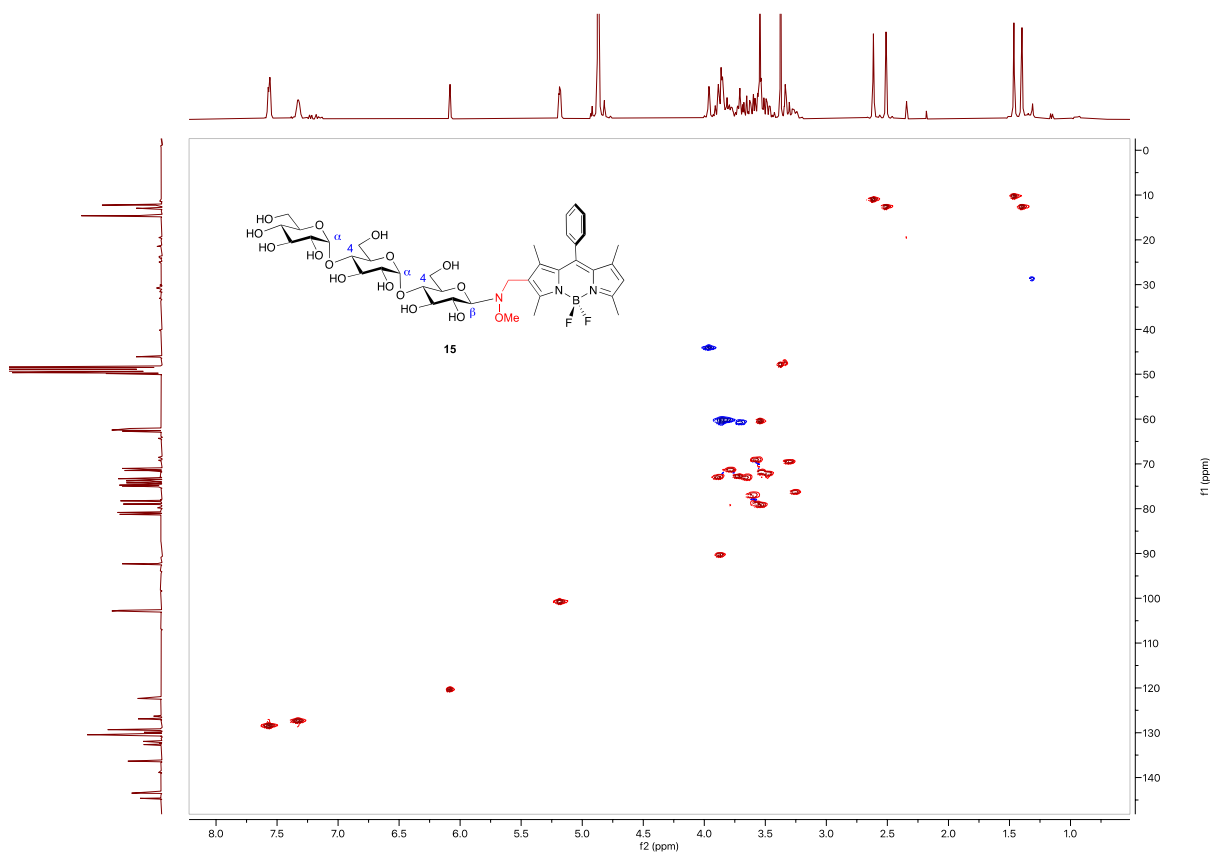

Fig S52. HSQC of 15

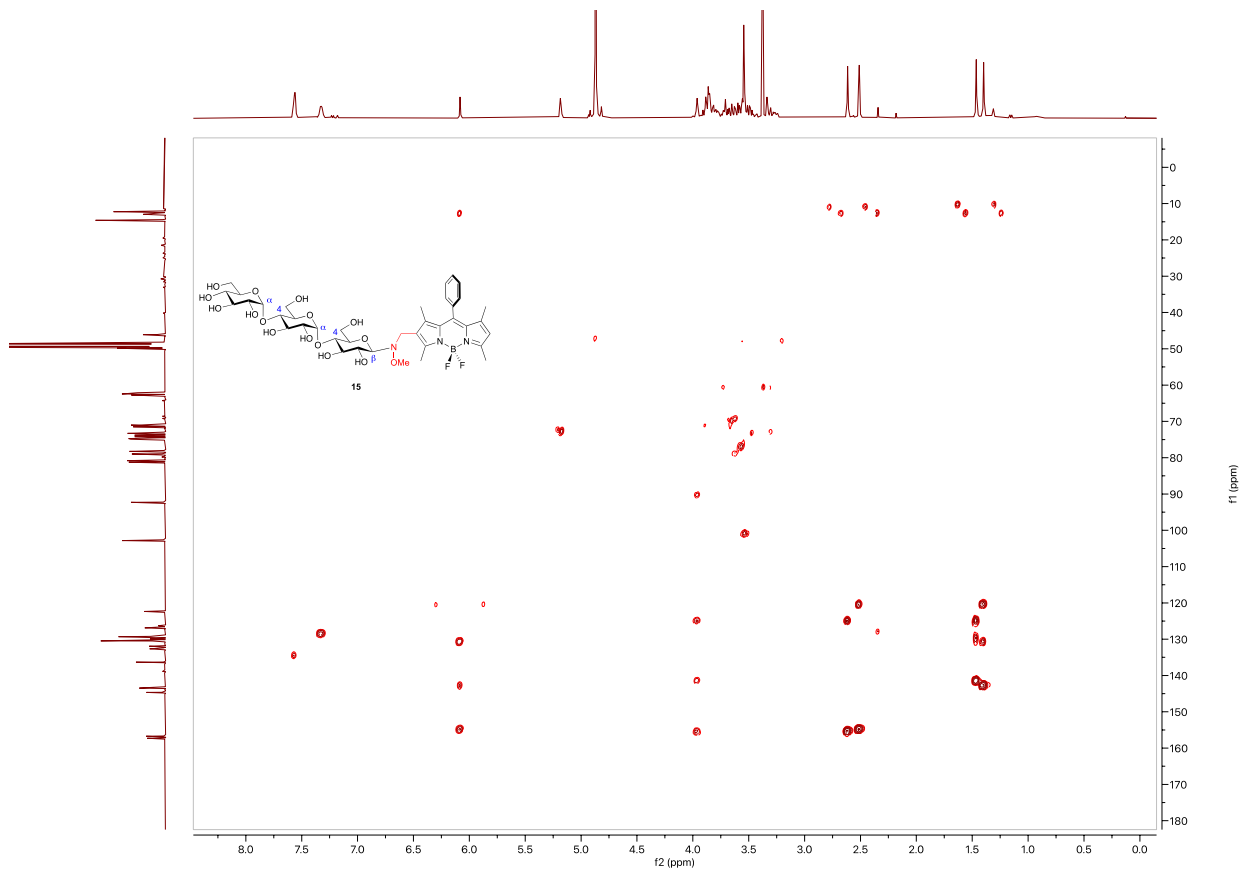

**Fig S53.** HMBC of **15**

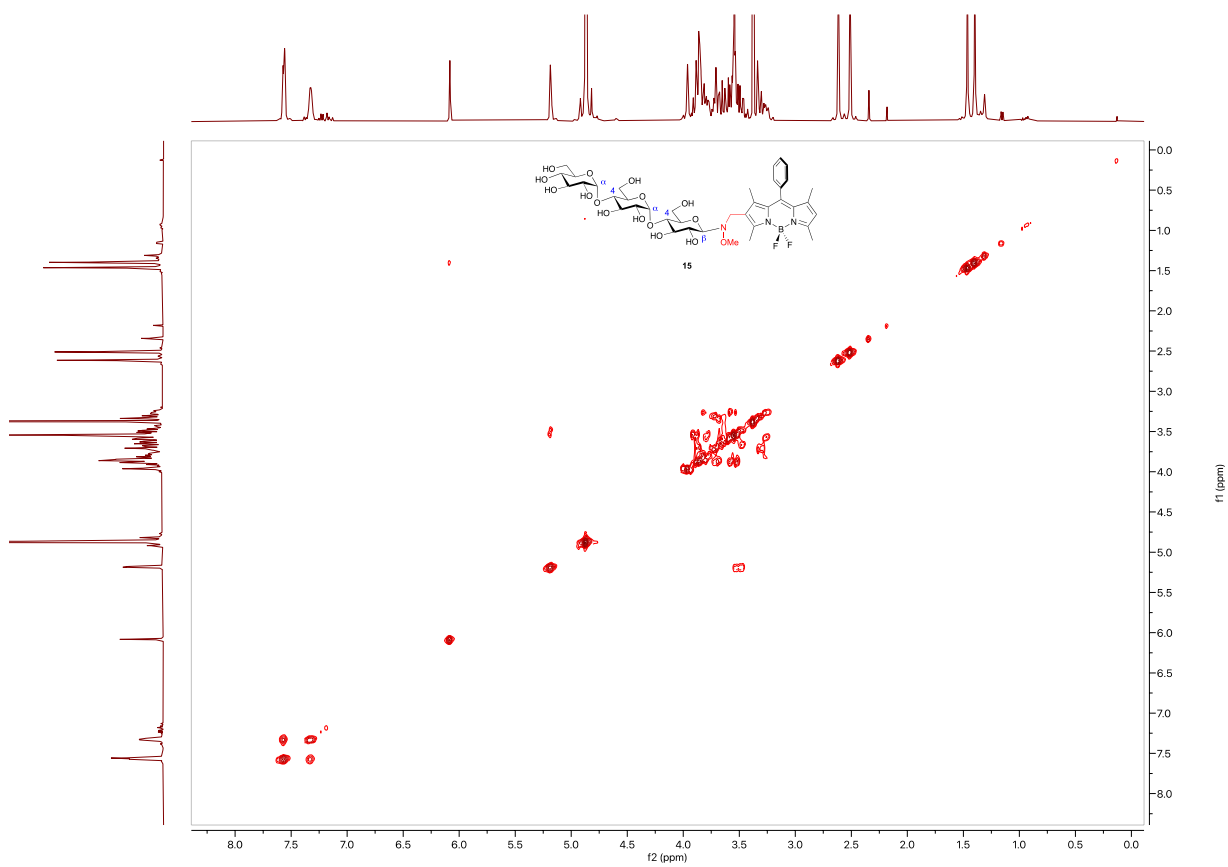

**Fig S54.** COSY of **15**

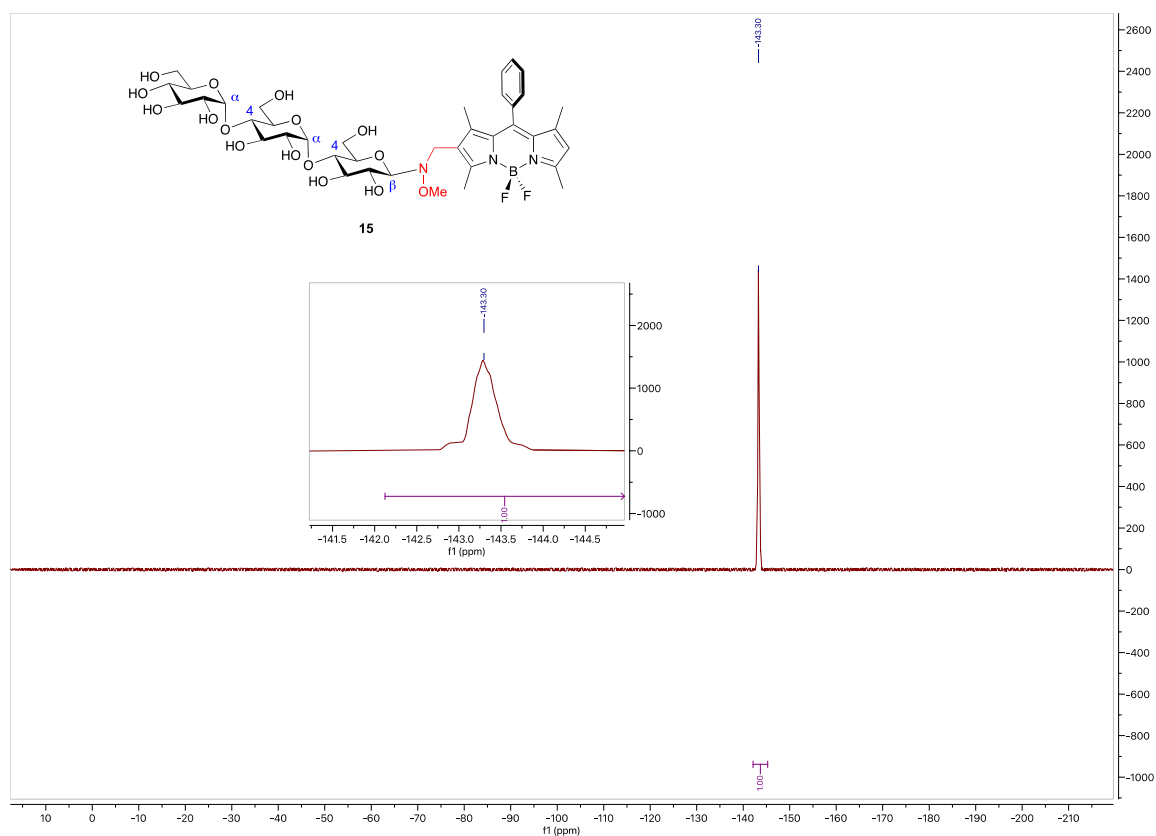

**Fig S55**  $^{19}\text{F}$ -NMR (376 MHz,  $\text{CD}_3\text{OD}$ ) of **15**

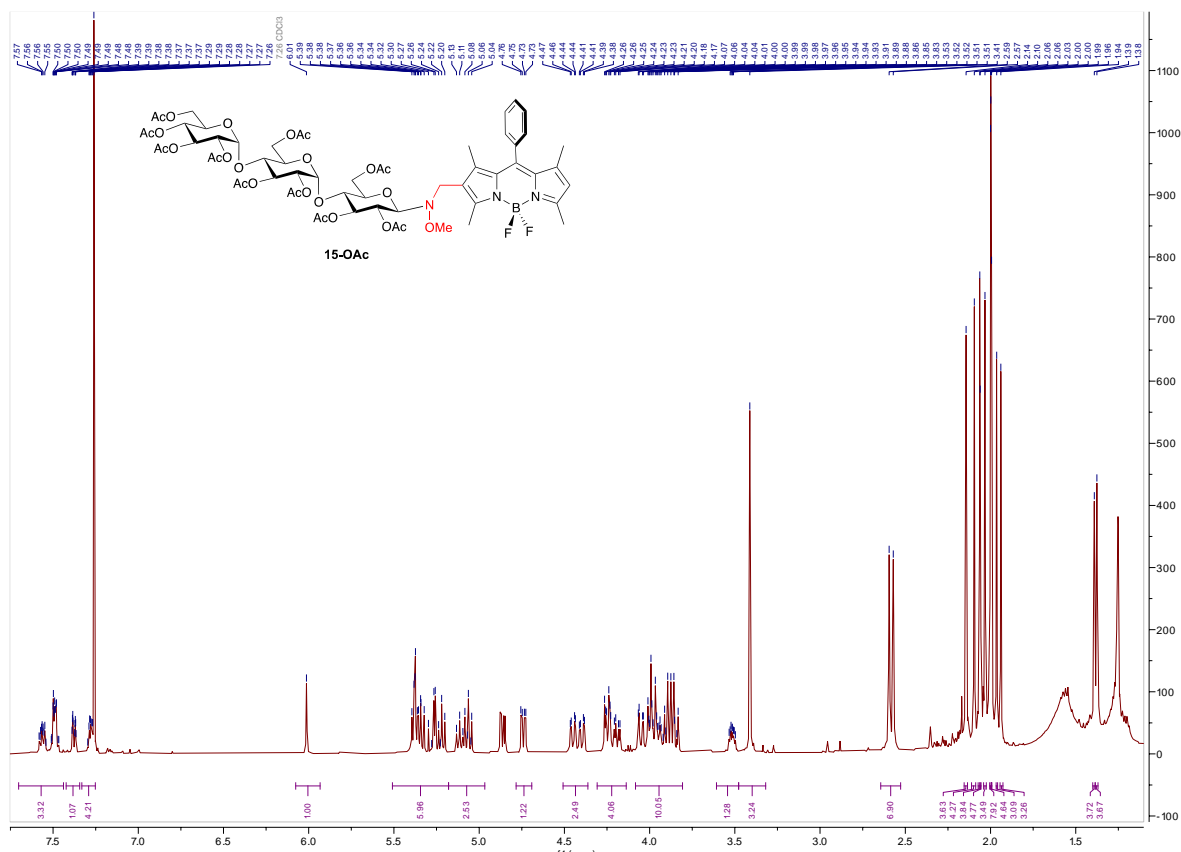

**Fig S56.**  $^1\text{H}$ -NMR (400 MHz,  $\text{CDCl}_3$ ) for **15-OAc**

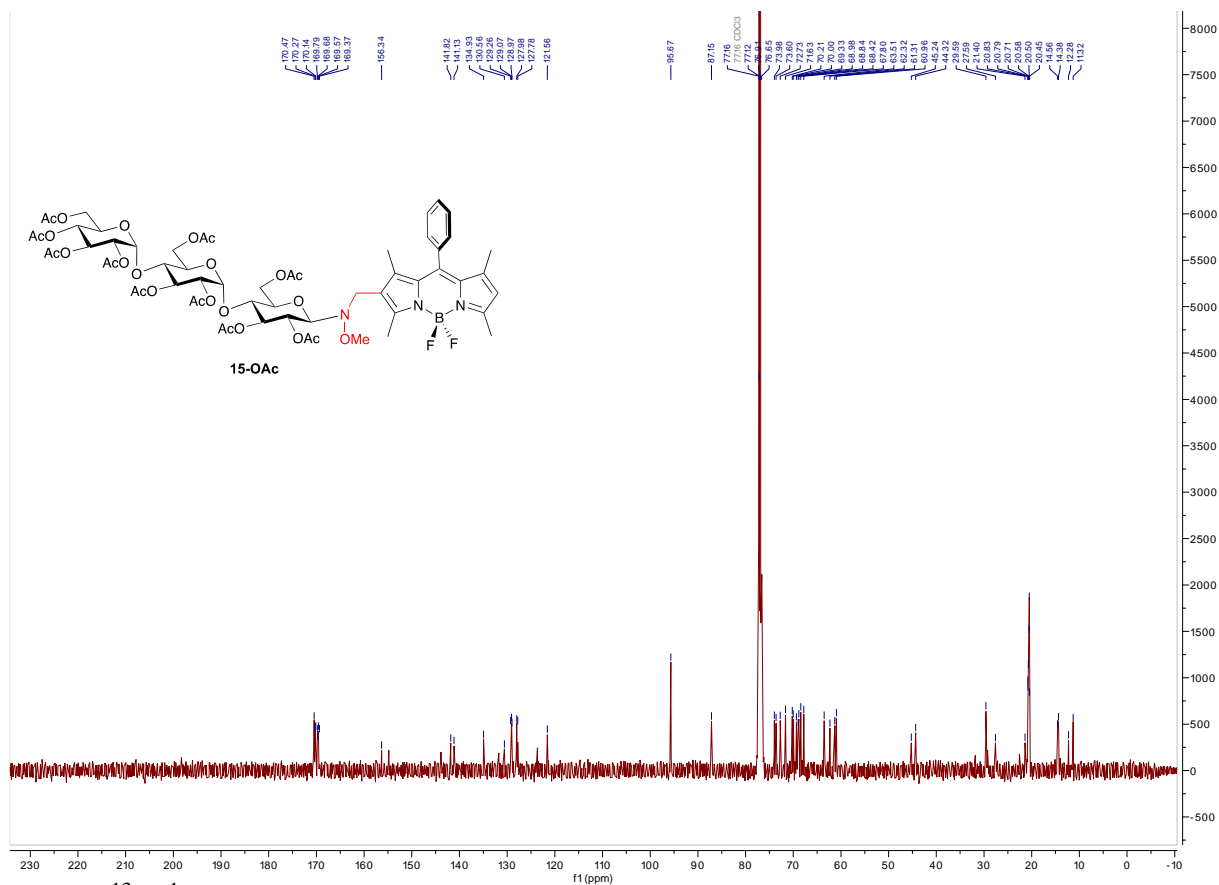

Fig S57  $^{13}\text{C}\{^1\text{H}\}$  NMR (101 MHz,  $\text{CDCl}_3$ ) of **15-OAc**

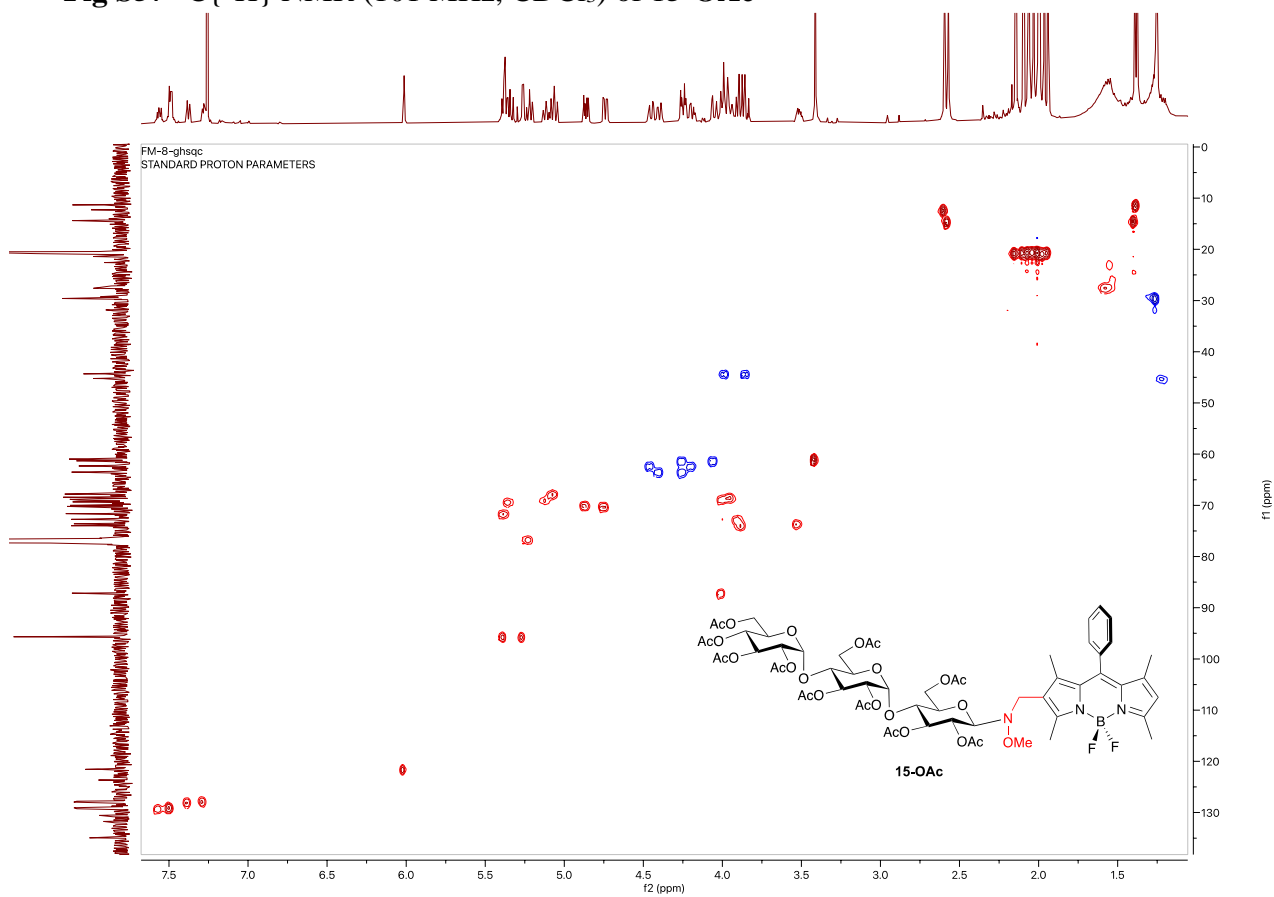

Fig S58. HSQC of **15-OAc**



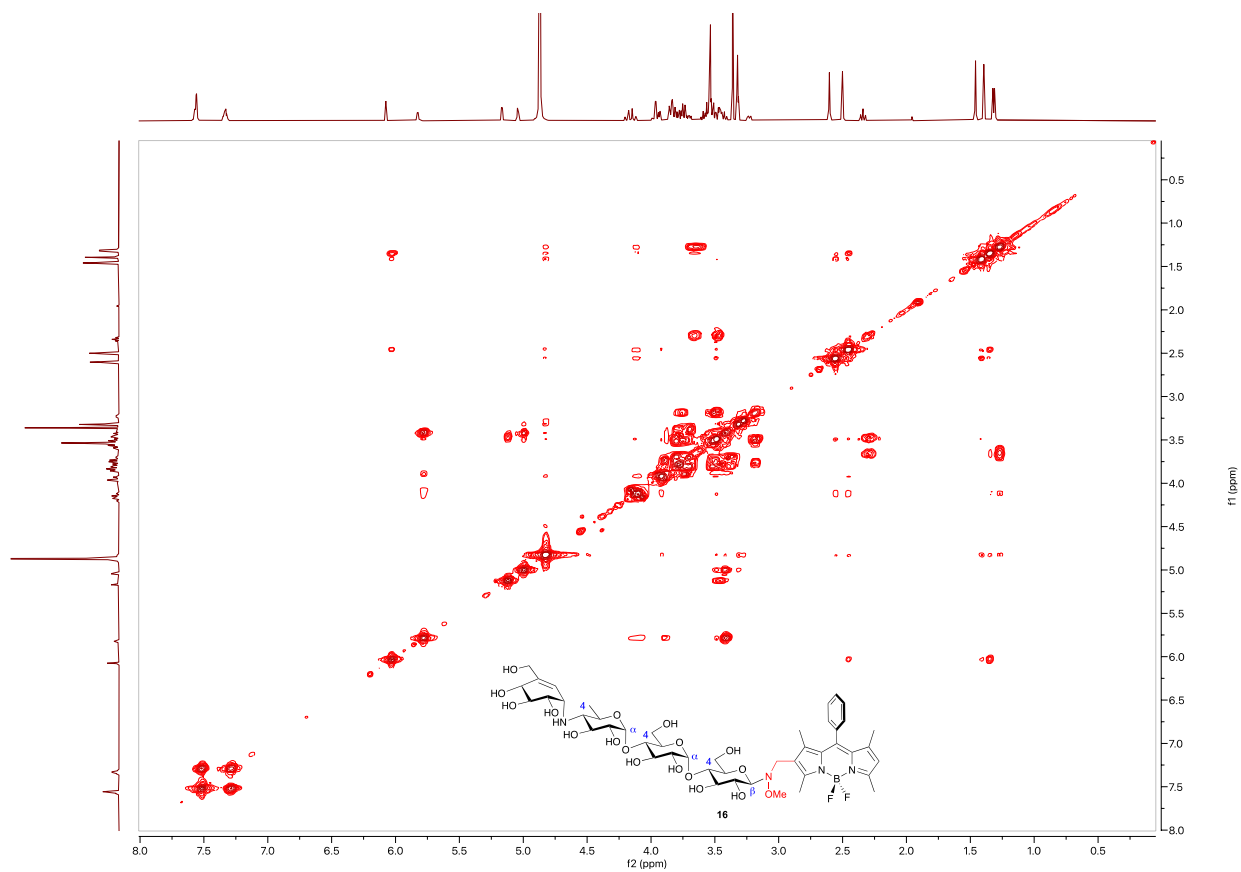

**Fig S61. COSY for 16**

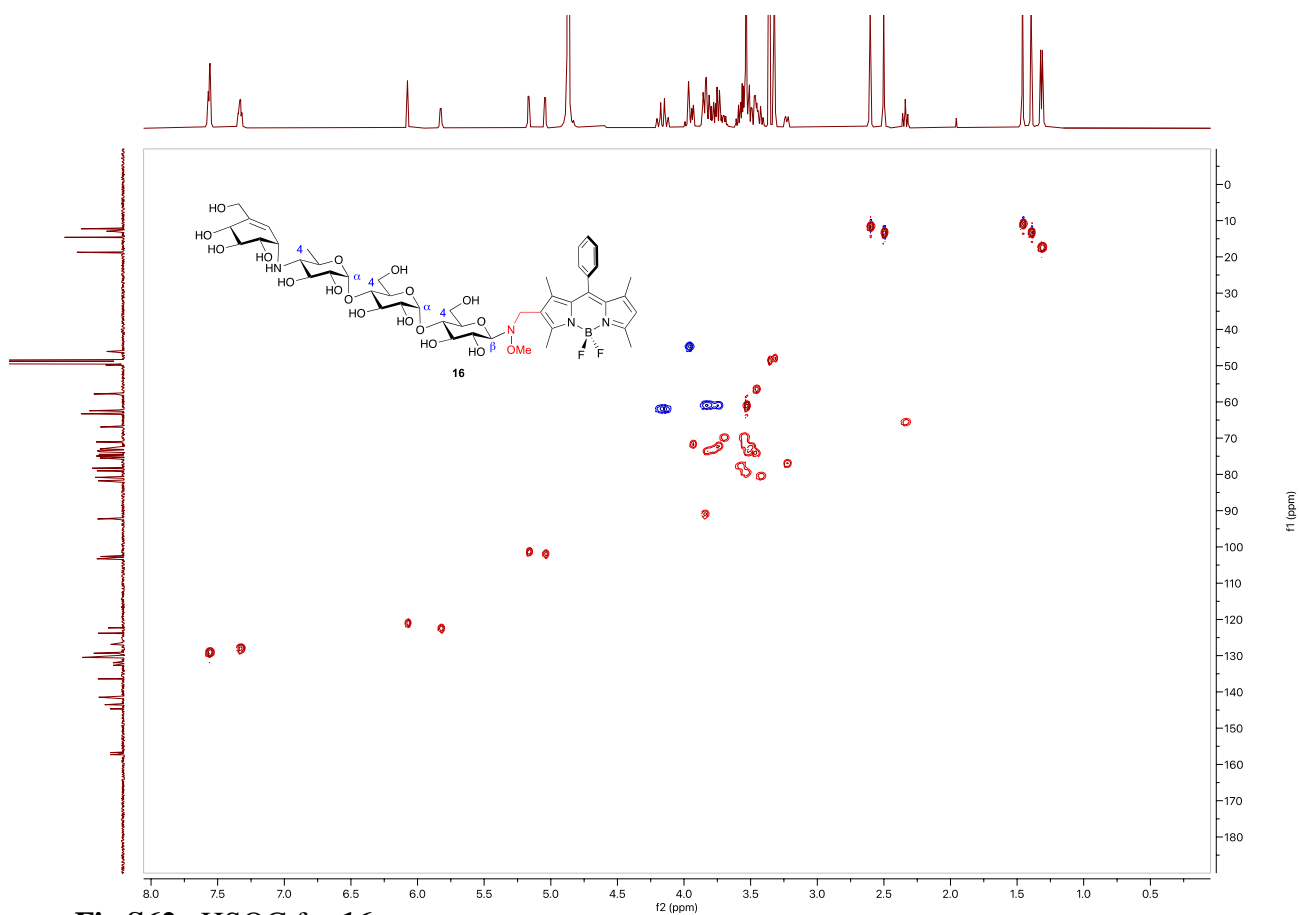

**Fig S62. HSQC for 16**







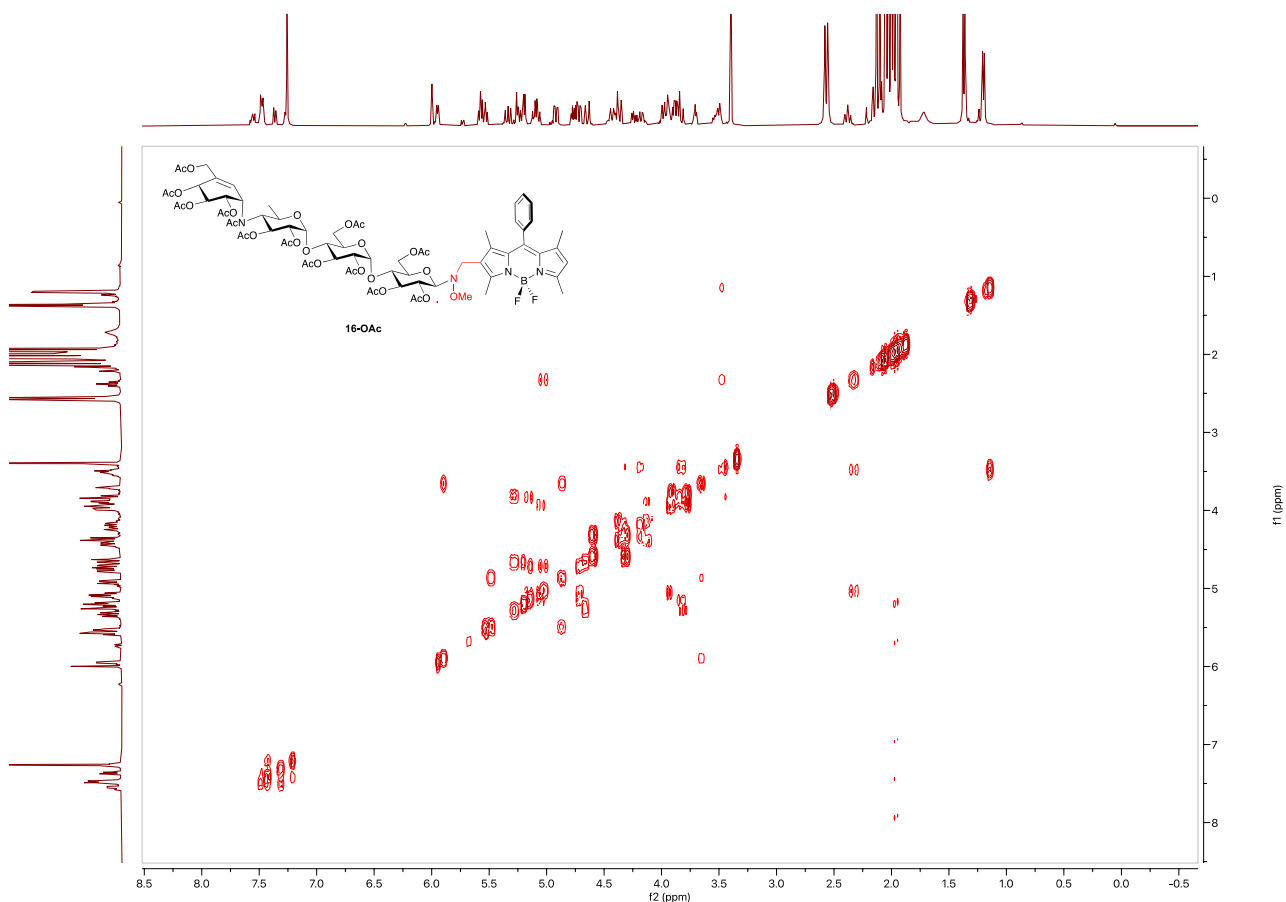

**Fig S67.** COSY of 16-OAc

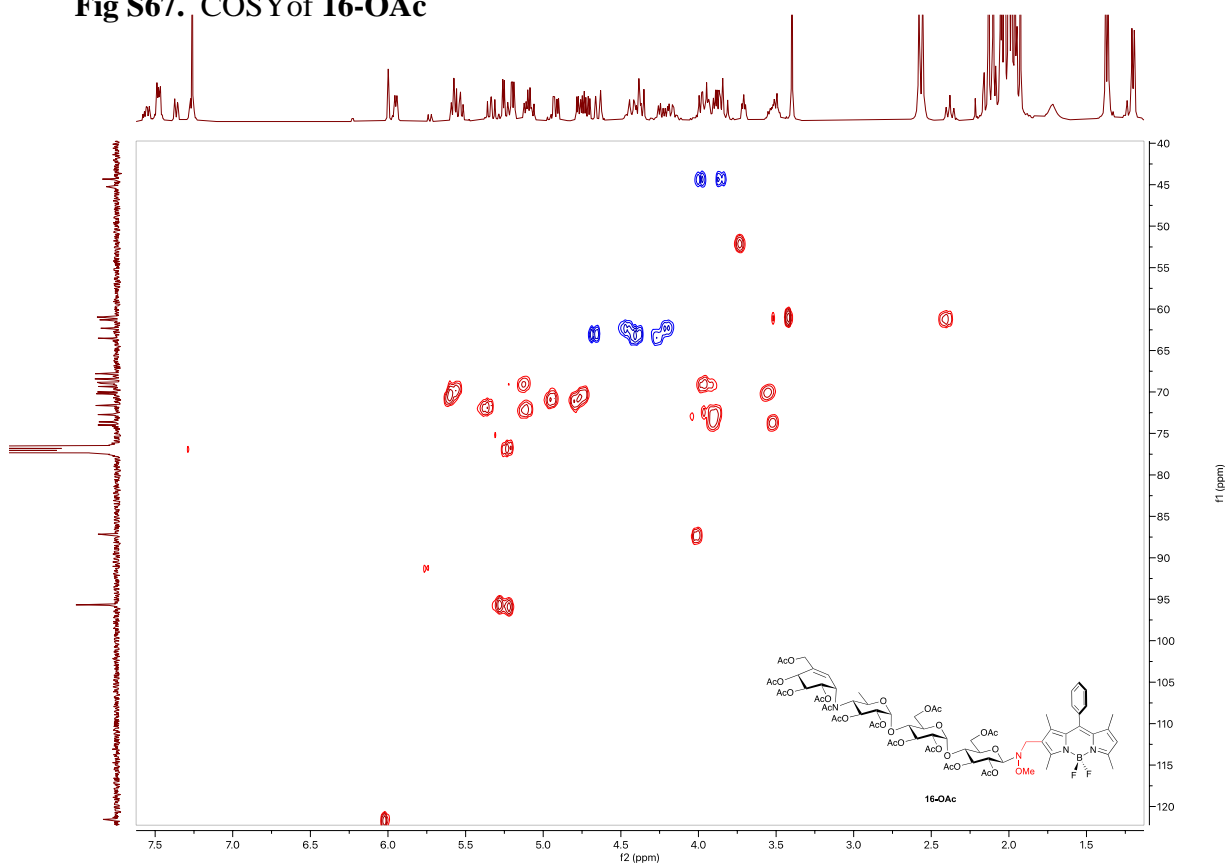

**Fig S68.** HSQC of 16-OAc

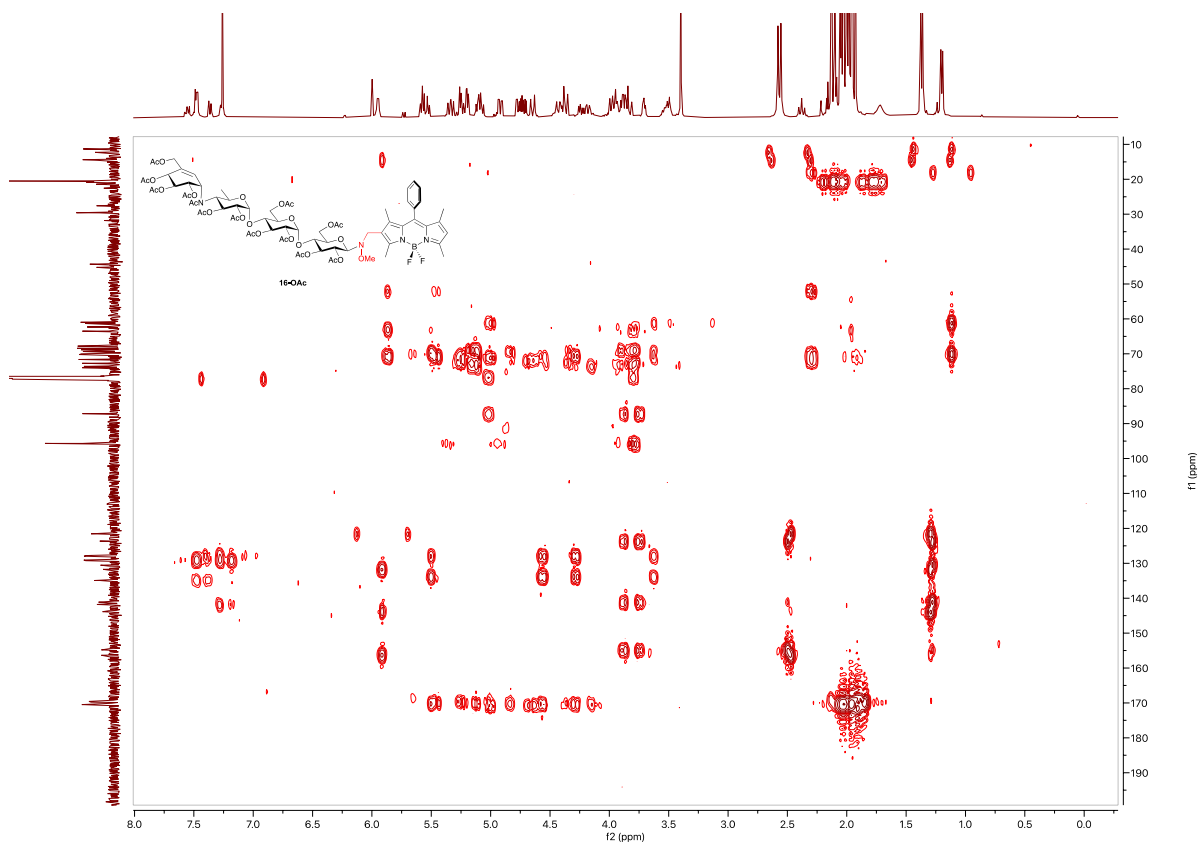

**Fig S69.** HMBC of 16-OAc

## 5. Copies of HRMS spectra

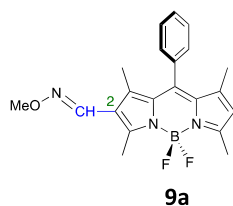

### Qualitative Compound Report

|                        |                         |                               |                  |
|------------------------|-------------------------|-------------------------------|------------------|
| <b>Data File</b>       | 14394_DSP_130_A_01.d    | <b>Sample Name</b>            | DSP_130_A        |
| <b>Sample Type</b>     | Sample                  | <b>Position</b>               | Vial 3           |
| <b>Instrument Name</b> | Instrument 1            | <b>User Name</b>              |                  |
| <b>Acq Method</b>      | ESI_ACN_75_pos.m        | <b>IRM Calibration Status</b> | Some Ions Missed |
| <b>DA Method</b>       | Defecto_modificado_CS.m | <b>Comment</b>                |                  |

#### Compound Table

| Compound Label           | RT    | Mass      | Abund  | Formula           | Tgt Mass  | Diff (ppm) |
|--------------------------|-------|-----------|--------|-------------------|-----------|------------|
| Cpd 1: C21 H22 B F2 N3 O | 0.252 | 380.18657 | 169953 | C21 H22 B F2 N3 O | 380.18603 | 1.42       |

| Compound Label           | RT    | Algorithm       | Mass      |
|--------------------------|-------|-----------------|-----------|
| Cpd 1: C21 H22 B F2 N3 O | 0.252 | Find By Formula | 380.18657 |

#### MS Zoomed Spectrum

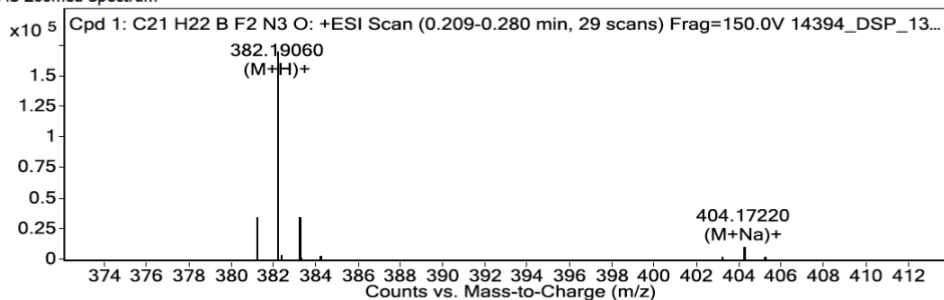

#### MS Spectrum Peak List

| m/z       | Calc m/z  | Diff(ppm) | z | Abund  | Formula              | Ion                 |
|-----------|-----------|-----------|---|--------|----------------------|---------------------|
| 381.1934  |           |           |   | 35130  |                      |                     |
| 381.25504 |           |           |   | 1367   |                      |                     |
| 382.1906  | 382.19006 | 1.41      |   | 169953 | C21 H23 B F2 N3 O    | (M+H) <sup>+</sup>  |
| 382.34204 |           |           |   | 4733   |                      |                     |
| 382.36793 |           |           |   | 1693   |                      |                     |
| 383.19324 | 383.19297 | 0.7       |   | 35024  | C21 H23 B F2 N3 O    | (M+H) <sup>+</sup>  |
| 383.25711 |           |           |   | 1762   |                      |                     |
| 384.19615 | 384.19586 | 0.74      |   | 4015   | C21 H23 B F2 N3 O    | (M+H) <sup>+</sup>  |
| 404.1722  | 404.172   | 0.49      | 1 | 10625  | C21 H22 B F2 N3 Na O | (M+Na) <sup>+</sup> |
| 405.17685 | 405.17492 | 4.76      | 1 | 2707   | C21 H22 B F2 N3 Na O | (M+Na) <sup>+</sup> |

--- End Of Report ---

Fig S70. HRMS of compound 9a

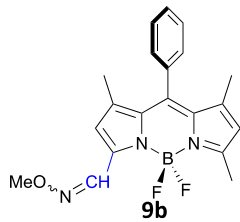

## Qualitative Compound Report

|                        |                         |                               |          |
|------------------------|-------------------------|-------------------------------|----------|
| <b>Data File</b>       | 14627_DPS-142A_01.d     | <b>Sample Name</b>            | DPS-142A |
| <b>Sample Type</b>     | Sample                  | <b>Position</b>               | Vial 1   |
| <b>Instrument Name</b> | Instrument 1            | <b>User Name</b>              |          |
| <b>Acq Method</b>      | ESI_ACN_75_pos.m        | <b>IRM Calibration Status</b> | Success  |
| <b>DA Method</b>       | Defecto_modificado_CS.m | <b>Comment</b>                |          |

### Compound Table

| Compound Label           | RT    | Mass      | Abund | Formula           | Tgt Mass  | Diff (ppm) |
|--------------------------|-------|-----------|-------|-------------------|-----------|------------|
| Cpd 1: C20 H20 B F2 N3 O | 1.079 | 366.17048 | 8473  | C20 H20 B F2 N3 O | 366.17038 | 0.28       |

| Compound Label           | RT    | Algorithm       | Mass      |
|--------------------------|-------|-----------------|-----------|
| Cpd 1: C20 H20 B F2 N3 O | 1.079 | Find By Formula | 366.17048 |

MS Zoomed Spectrum

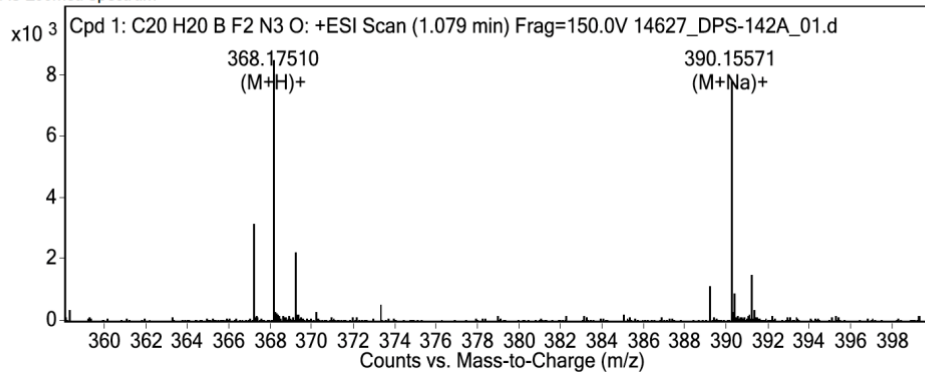

### MS Spectrum Peak List

| m/z       | Calc m/z  | Diff(ppm) | z | Abund | Formula              | Ion     |
|-----------|-----------|-----------|---|-------|----------------------|---------|
| 347.17113 |           |           |   | 2111  |                      |         |
| 348.16744 |           |           |   | 9404  |                      |         |
| 348.2197  |           |           |   | 473   |                      |         |
| 348.25948 |           |           |   | 347   |                      |         |
| 348.33841 |           |           |   | 316   |                      |         |
| 349.16935 |           |           |   | 2345  |                      |         |
| 368.1751  | 368.17439 | 1.92      | 1 | 8473  | C20 H21 B F2 N3 O    | (M+H)+  |
| 369.1752  | 369.1773  | -5.67     | 1 | 2262  | C20 H21 B F2 N3 O    | (M+H)+  |
| 390.15571 | 390.15633 | -1.61     | 1 | 7788  | C20 H20 B F2 N3 Na O | (M+Na)+ |
| 391.16018 | 391.15924 | 2.4       | 1 | 1498  | C20 H20 B F2 N3 Na O | (M+Na)+ |

--- End Of Report ---

**Fig S71. HRMS of compound 9b**

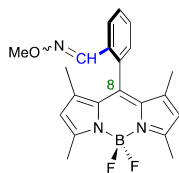

9c

## Qualitative Compound Report

|                        |                         |                               |         |
|------------------------|-------------------------|-------------------------------|---------|
| <b>Data File</b>       | 14759_MRY_306_01.d      | <b>Sample Name</b>            | MRY_306 |
| <b>Sample Type</b>     | Sample                  | <b>Position</b>               | Vial 16 |
| <b>Instrument Name</b> | Instrument 1            | <b>User Name</b>              |         |
| <b>Acq Method</b>      | ESI_ACN_75_pos.m        | <b>IRM Calibration Status</b> | Success |
| <b>DA Method</b>       | Defecto_modificado_CS.m | <b>Comment</b>                |         |

### Compound Table

| Compound Label           | RT    | Mass      | Abund | Formula           | Tgt Mass  | Diff (ppm) |
|--------------------------|-------|-----------|-------|-------------------|-----------|------------|
| Cpd 1: C21 H22 B F2 N3 O | 0.355 | 380.18716 | 53727 | C21 H22 B F2 N3 O | 380.18603 | 2.96       |

| Compound Label           | RT    | Algorithm       | Mass      |
|--------------------------|-------|-----------------|-----------|
| Cpd 1: C21 H22 B F2 N3 O | 0.355 | Find By Formula | 380.18716 |

MS Zoomed Spectrum

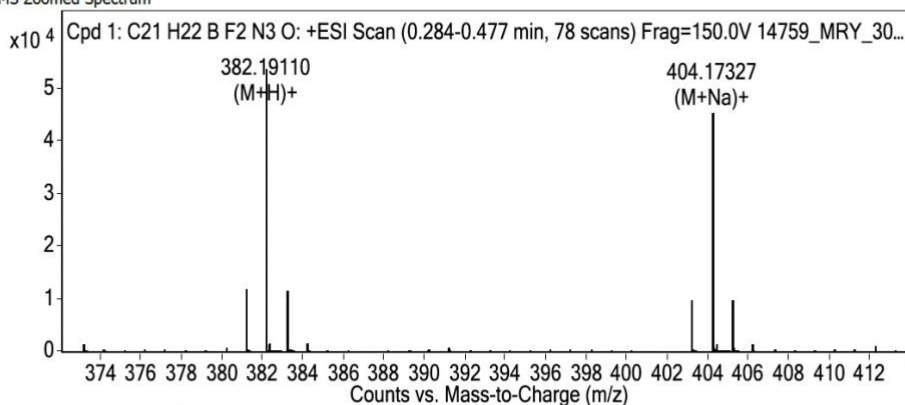

### MS Spectrum Peak List

| m/z       | Calc m/z  | Diff(ppm) | z | Abund | Formula              | Ion     |
|-----------|-----------|-----------|---|-------|----------------------|---------|
| 361.18796 |           |           |   | 14521 |                      |         |
| 362.18496 |           |           |   | 66915 |                      |         |
| 362.35951 |           |           |   | 2112  |                      |         |
| 363.18754 |           |           |   | 14636 |                      |         |
| 364.19015 |           |           |   | 2195  |                      |         |
| 382.1911  | 382.19006 | 2.73      | 1 | 53727 | C21 H23 B F2 N3 O    | (M+H)+  |
| 383.1938  | 383.19297 | 2.15      | 1 | 11737 | C21 H23 B F2 N3 O    | (M+H)+  |
| 384.19647 | 384.19586 | 1.57      | 1 | 1605  | C21 H23 B F2 N3 O    | (M+H)+  |
| 404.17327 | 404.172   | 3.14      | 1 | 45310 | C21 H22 B F2 N3 Na O | (M+Na)+ |
| 405.17579 | 405.17492 | 2.16      | 1 | 9929  | C21 H22 B F2 N3 Na O | (M+Na)+ |

--- End Of Report ---

Fig S72. HRMS of compound 9c

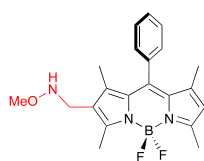

6a

## Qualitative Compound Report

|                 |                         |                        |                  |
|-----------------|-------------------------|------------------------|------------------|
| Data File       | 14399_DPS_131_C_01.d    | Sample Name            | DPS_131_C        |
| Sample Type     | Sample                  | Position               | Vial 4           |
| Instrument Name | Instrument 1            | User Name              |                  |
| Acq Method      | ESI_ACN_75_pos.m        | IRM Calibration Status | Some Ions Missed |
| DA Method       | Defecto_modificado_CS.m | Comment                |                  |

### Compound Table

| Compound Label           | RT    | Mass      | Abund | Formula           | Tgt Mass  | Diff (ppm) |
|--------------------------|-------|-----------|-------|-------------------|-----------|------------|
| Cpd 1: C21 H24 B F2 N3 O | 0.289 | 382.20247 | 7760  | C21 H24 B F2 N3 O | 382.20168 | 2.07       |

| Compound Label           | RT    | Algorithm       | Mass      |
|--------------------------|-------|-----------------|-----------|
| Cpd 1: C21 H24 B F2 N3 O | 0.289 | Find By Formula | 382.20247 |

MS Zoomed Spectrum

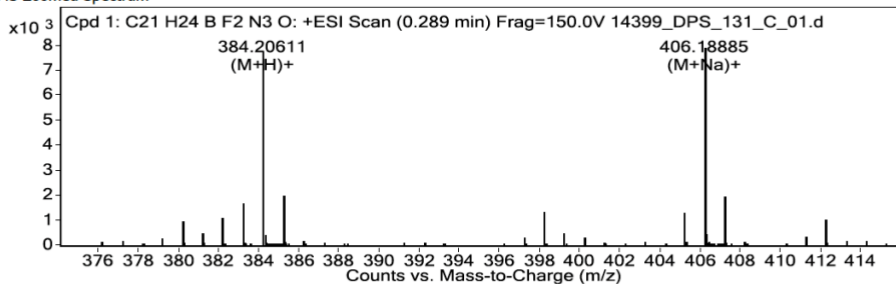

### MS Spectrum Peak List

| m/z       | Calc m/z  | Diff(ppm) | z | Abund  | Formula              | Ion     |
|-----------|-----------|-----------|---|--------|----------------------|---------|
| 336.17203 |           |           |   | 32975  |                      |         |
| 337.16896 |           |           |   | 161740 |                      |         |
| 337.25446 |           |           |   | 3395   |                      |         |
| 337.33631 |           |           |   | 5758   |                      |         |
| 338.17122 |           |           |   | 29651  |                      |         |
| 339.17634 |           |           |   | 3417   |                      |         |
| 384.20611 | 384.20571 | 1.04      | 1 | 7760   | C21 H25 B F2 N3 O    | (M+H)+  |
| 385.20842 | 385.20863 | -0.53     | 1 | 2007   | C21 H25 B F2 N3 O    | (M+H)+  |
| 406.18885 | 406.18765 | 2.94      | 1 | 7888   | C21 H24 B F2 N3 Na O | (M+Na)+ |
| 407.19074 | 407.19057 | 0.42      | 1 | 1971   | C21 H24 B F2 N3 Na O | (M+Na)+ |

--- End Of Report ---

Fig S73. HRMS of compound 6a

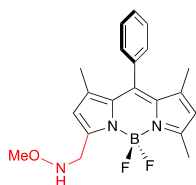

6b

## Qualitative Compound Report

|                        |                         |                               |           |
|------------------------|-------------------------|-------------------------------|-----------|
| <b>Data File</b>       | 14643_DPS-134_A_01.d    | <b>Sample Name</b>            | DPS-134_A |
| <b>Sample Type</b>     | Sample                  | <b>Position</b>               | Vial 17   |
| <b>Instrument Name</b> | Instrument 1            | <b>User Name</b>              |           |
| <b>Acq Method</b>      | ESI_ACN_75_pos.m        | <b>IRM Calibration Status</b> | Success   |
| <b>DA Method</b>       | Defecto_modificado_CS.m | <b>Comment</b>                |           |

### Compound Table

| Compound Label           | RT   | Mass      | Abund | Formula           | Tgt Mass  | Diff (ppm) |
|--------------------------|------|-----------|-------|-------------------|-----------|------------|
| Cpd 1: C20 H22 B F2 N3 O | 0.49 | 368.18749 | 8776  | C20 H22 B F2 N3 O | 368.18603 | 3.97       |

| Compound Label           | RT   | Algorithm       | Mass      |
|--------------------------|------|-----------------|-----------|
| Cpd 1: C20 H22 B F2 N3 O | 0.49 | Find By Formula | 368.18749 |

MS Zoomed Spectrum

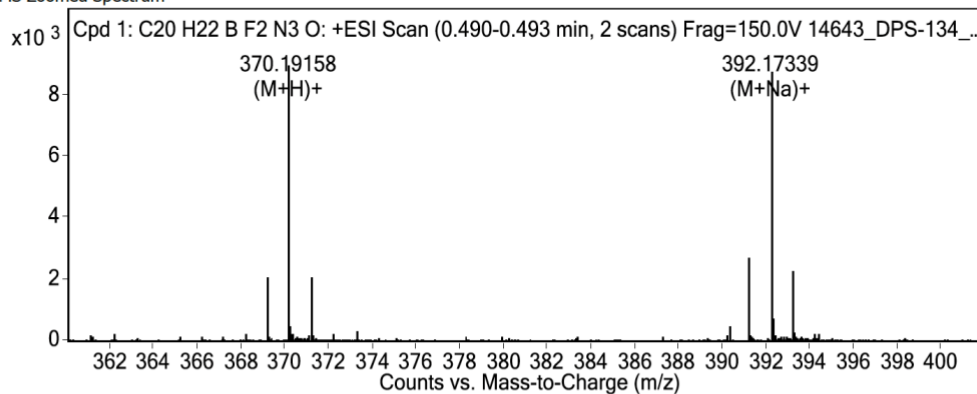

### MS Spectrum Peak List

| m/z       | Calc m/z  | Diff(ppm) | z | Abund | Formula              | Ion     |
|-----------|-----------|-----------|---|-------|----------------------|---------|
| 318.15631 |           |           |   | 1640  |                      |         |
| 322.15673 |           |           |   | 16062 |                      |         |
| 323.15414 |           |           |   | 74107 |                      |         |
| 323.31912 |           |           |   | 2467  |                      |         |
| 324.15633 |           |           |   | 15032 |                      |         |
| 325.15972 |           |           |   | 1526  |                      |         |
| 370.19158 | 370.19004 | 4.16      | 1 | 8953  | C20 H23 B F2 N3 O    | (M+H)+  |
| 371.19404 | 371.19295 | 2.93      | 1 | 2067  | C20 H23 B F2 N3 O    | (M+H)+  |
| 392.17339 | 392.17198 | 3.59      | 1 | 8776  | C20 H22 B F2 N3 Na O | (M+Na)+ |
| 393.17478 | 393.1749  | -0.29     | 1 | 2292  | C20 H22 B F2 N3 Na O | (M+Na)+ |

--- End Of Report ---

Fig S74. HRMS of compound 6b



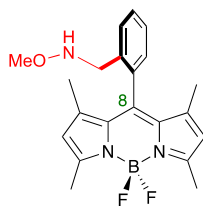

6c

## Qualitative Compound Report

|                        |                         |                               |                  |
|------------------------|-------------------------|-------------------------------|------------------|
| <b>Data File</b>       | 14760_MRY_307_01.d      | <b>Sample Name</b>            | MRY_307          |
| <b>Sample Type</b>     | Sample                  | <b>Position</b>               | Vial 17          |
| <b>Instrument Name</b> | Instrument 1            | <b>User Name</b>              |                  |
| <b>Acq Method</b>      | ESI_ACN_75_pos.m        | <b>IRM Calibration Status</b> | Some Ions Missed |
| <b>DA Method</b>       | Defecto_modificado_CS.m | <b>Comment</b>                |                  |

### Compound Table

| Compound Label           | RT   | Mass  | Abund | Formula           | Tgt Mass  | Diff (ppm) |
|--------------------------|------|-------|-------|-------------------|-----------|------------|
| Cpd 1: C21 H24 B F2 N3 O | 0.33 | 382.2 | 55772 | C21 H24 B F2 N3 O | 382.20168 | -4.4       |

| Compound Label           | RT   | Algorithm       | Mass  |
|--------------------------|------|-----------------|-------|
| Cpd 1: C21 H24 B F2 N3 O | 0.33 | Find By Formula | 382.2 |

MS Zoomed Spectrum

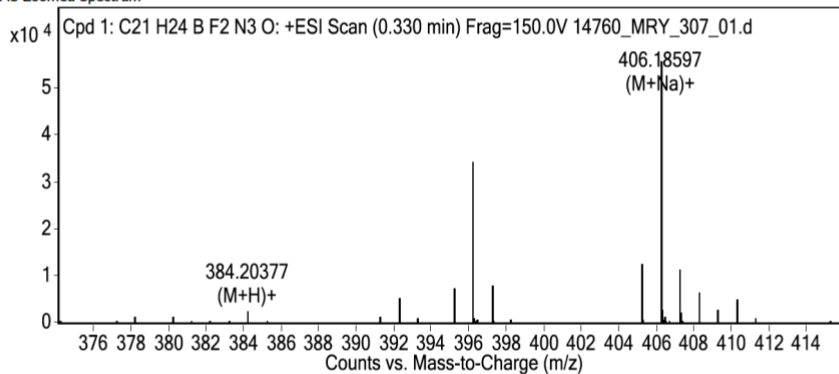

### MS Spectrum Peak List

| m/z       | Calc m/z  | Diff(ppm) | z | Abund  | Formula              | Ion     |
|-----------|-----------|-----------|---|--------|----------------------|---------|
| 363.20082 |           |           |   | 71566  |                      |         |
| 364.19804 |           |           |   | 338839 |                      |         |
| 364.30695 |           |           |   | 7228   |                      |         |
| 364.3725  |           |           |   | 16234  |                      |         |
| 364.44972 |           |           |   | 4827   |                      |         |
| 365.20034 |           |           |   | 79705  |                      |         |
| 366.20302 |           |           |   | 8451   |                      |         |
| 384.20377 | 384.20571 | -5.05     | 1 | 2667   | C21 H25 B F2 N3 O    | (M+H)+  |
| 406.18597 | 406.18765 | -4.14     | 1 | 55772  | C21 H24 B F2 N3 Na O | (M+Na)+ |
| 407.18877 | 407.19057 | -4.41     | 1 | 11614  | C21 H24 B F2 N3 Na O | (M+Na)+ |

--- End Of Report ---

Fig S75. HRMS of compound 6c

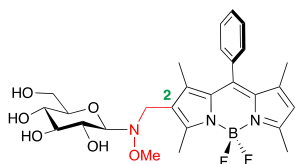

10a

## Qualitative Compound Report

|                               |                      |                      |                                   |
|-------------------------------|----------------------|----------------------|-----------------------------------|
| <b>Data File</b>              | 338_DPS-188A_01.d    | <b>Sample Name</b>   | DPS-188A                          |
| <b>Sample Type</b>            | Sample               | <b>Position</b>      | Vial 16                           |
| <b>Instrument Name</b>        | Instrument 1         | <b>User Name</b>     |                                   |
| <b>Acq Method</b>             | ESI_ACN_75_pos_new.m | <b>Acquired Time</b> | 3/12/2021 12:34:10 PM (UTC+01:00) |
| <b>IRM Calibration Status</b> | Success              | <b>DA Method</b>     | Defecto_modificado.m              |
| <b>Comment</b>                |                      |                      |                                   |

|                                 |                                   |                              |                                                         |
|---------------------------------|-----------------------------------|------------------------------|---------------------------------------------------------|
| <b>Sample Group</b>             |                                   | <b>Info.</b>                 |                                                         |
| <b>User</b>                     | DIEGO POZAS                       | <b>Stream Name</b>           | LC 1                                                    |
| <b>Acquisition Time (Local)</b> | 3/12/2021 12:34:10 PM (UTC+01:00) | <b>Acquisition SW</b>        | 6200 series TOF/6500 series Q-TOF B.08.00 (B8058.3 SP1) |
| <b>Version</b>                  |                                   | <b>Version</b>               |                                                         |
| <b>QTOF Driver Version</b>      | 8.00.00                           | <b>QTOF Firmware Version</b> | 2.712                                                   |
| <b>Tune Mass Range</b>          | 3200                              |                              |                                                         |
| <b>Max.</b>                     |                                   |                              |                                                         |

### Compound Table

| Compound Label                   | RT    | Mass     | Abund   | Formula            | Tgt Mass | Diff (ppm) | Hits (DB) |
|----------------------------------|-------|----------|---------|--------------------|----------|------------|-----------|
| Cpd 1: C27 H34 B F2 N3 O6; 0.251 | 0.251 | 544.2524 | 1104030 | C27 H34 B F2 N3 O6 | 544.2545 | -3.83      | 1         |

| Compound Label                   | m/z      | RT    | Algorithm       | Mass     |
|----------------------------------|----------|-------|-----------------|----------|
| Cpd 1: C27 H34 B F2 N3 O6; 0.251 | 568.2376 | 0.251 | Find by Formula | 544.2524 |

### MS Zoomed Spectrum

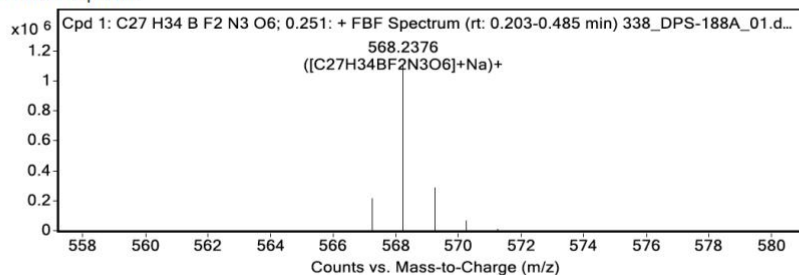

### MS Spectrum Peak List

| m/z      | z | Abund     | Formula       | Ion     |
|----------|---|-----------|---------------|---------|
| 567.2423 | 1 | 212627.56 | C27H34BF2N3O6 | (M+Na)+ |
| 568.2376 | 1 | 1104029.5 | C27H34BF2N3O6 | (M+Na)+ |
| 569.2437 | 1 | 285883.94 | C27H34BF2N3O6 | (M+Na)+ |
| 570.2472 | 1 | 63614.71  | C27H34BF2N3O6 | (M+Na)+ |
| 571.2524 | 1 | 10027.86  | C27H34BF2N3O6 | (M+Na)+ |

MS Zoomed Spectrum

Fig S76. HRMS of compound 10a

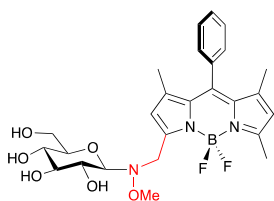

10b

## Qualitative Compound Report

|                        |                         |                               |          |
|------------------------|-------------------------|-------------------------------|----------|
| <b>Data File</b>       | 14725_DPS_148A_01.d     | <b>Sample Name</b>            | DPS_148A |
| <b>Sample Type</b>     | Sample                  | <b>Position</b>               | Vial 6   |
| <b>Instrument Name</b> | Instrument 1            | <b>User Name</b>              |          |
| <b>Acq Method</b>      | ESI_ACN_75_pos.m        | <b>IRM Calibration Status</b> | Success  |
| <b>DA Method</b>       | Defecto_modificado_CS.m | <b>Comment</b>                |          |

### Compound Table

| Compound Label            | RT   | Mass     | Abund | Formula            | Tgt Mass  | Diff (ppm) |
|---------------------------|------|----------|-------|--------------------|-----------|------------|
| Cpd 1: C26 H32 B F2 N3 O6 | 0.47 | 530.2398 | 4442  | C26 H32 B F2 N3 O6 | 530.23885 | 1.79       |

| Compound Label            | RT   | Algorithm       | Mass     |
|---------------------------|------|-----------------|----------|
| Cpd 1: C26 H32 B F2 N3 O6 | 0.47 | Find By Formula | 530.2398 |

MS Zoomed Spectrum

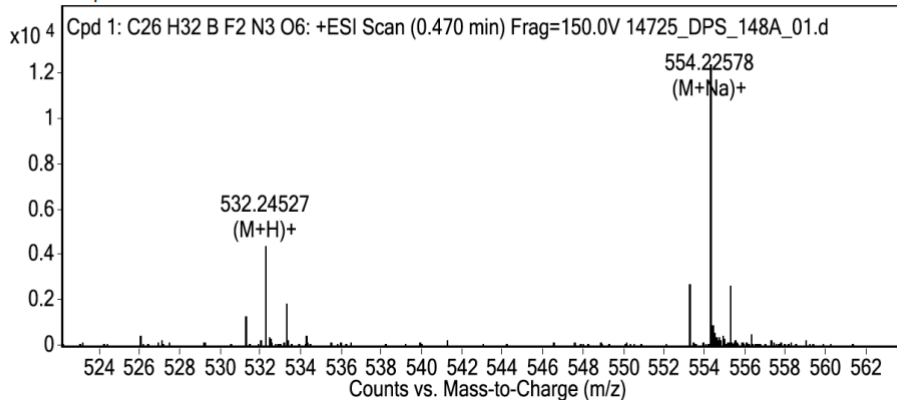

### MS Spectrum Peak List

| m/z       | Calc m/z  | Diff (ppm) | z | Abund | Formula               | Ion     |
|-----------|-----------|------------|---|-------|-----------------------|---------|
| 118.08463 |           |            |   | 646   |                       |         |
| 119.0834  |           |            |   | 573   |                       |         |
| 121.05103 |           |            |   | 16499 |                       |         |
| 121.11125 |           |            |   | 1125  |                       |         |
| 121.15353 |           |            |   | 886   |                       |         |
| 122.05109 |           |            |   | 1109  |                       |         |
| 532.24527 | 532.24297 | 4.33       | 1 | 4442  | C26 H33 B F2 N3 O6    | (M+H)+  |
| 533.2471  | 533.24594 | 2.17       | 1 | 1857  | C26 H33 B F2 N3 O6    | (M+H)+  |
| 554.22578 | 554.22491 | 1.57       | 1 | 12402 | C26 H32 B F2 N3 Na O6 | (M+Na)+ |
| 555.23024 | 555.22789 | 4.24       | 1 | 2680  | C26 H32 B F2 N3 Na O6 | (M+Na)+ |

--- End Of Report ---

Fig S77. HRMS of compound 10b

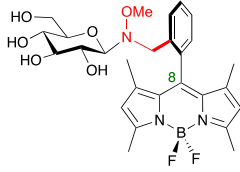

10c

## Custom Workflow Report

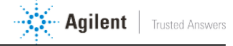

### Sample Information

|                       |                 |                           |                                                               |
|-----------------------|-----------------|---------------------------|---------------------------------------------------------------|
| <b>Name</b>           | MRY_767_2       | <b>Data File Path</b>     | D:\Projects\MASAS EXACTAS_2024\Data\2024\Mar\2997_MRY_767_2.d |
| <b>Sample ID</b>      |                 | <b>Acq. Time (Local)</b>  | 3/14/2024 1:29:22 PM (UTC+01:00)                              |
| <b>Instrument</b>     | UPLC-QTOF       | <b>Method Path (Acq)</b>  | D:\Projects\MASAS EXACTAS_2024\Methods\FIA_masa_exacta_MSMS.m |
| <b>MS Type</b>        | QTOF            | <b>Version (Acq SW)</b>   | 6200 series TOF/6500 series Q-TOF (11.0.221.1)                |
| <b>Inj. Vol. (ul)</b> | 0.2             | <b>IRM Status</b>         | All ions missed                                               |
| <b>Position</b>       | P1-D1           | <b>Method Path (DA)</b>   | D:\Projects\MASAS EXACTAS_2023\Methods\DA_MSMS_MPS_jun.m      |
| <b>Plate Pos.</b>     |                 | <b>Target Source Path</b> |                                                               |
| <b>Operator</b>       | SYSTEM (SYSTEM) | <b>Result Summary</b>     | 1 qualified (1 targets)                                       |

### Sample Spectra

#### + Scan (rt: 0.138-0.351 min) Sub

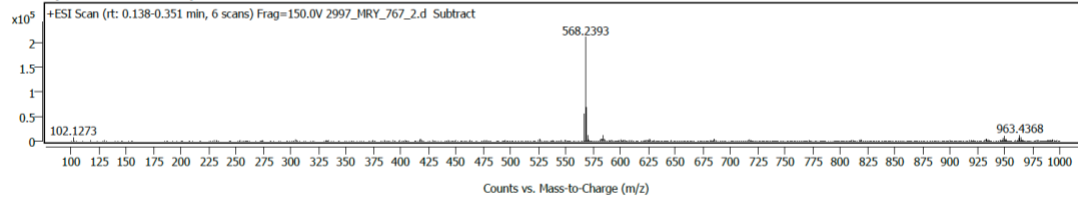

#### Spectrum Peaks

| m/z      | Z | Abund  | Abund % |
|----------|---|--------|---------|
| 102.1273 |   | 7734   | 3.65    |
| 567.2425 |   | 55595  | 26.22   |
| 568.2393 | 1 | 212033 | 100.00  |
| 569.2420 | 1 | 68943  | 32.52   |
| 570.2450 | 1 | 12260  | 5.78    |
| 584.2126 |   | 12010  | 5.66    |
| 948.4238 |   | 5803   | 2.74    |
| 949.4200 |   | 9549   | 4.50    |
| 963.4368 | 1 | 11472  | 5.41    |
| 964.4386 | 1 | 6687   | 3.15    |

### Compound Details

#### Cpd. 1: C27 H34 B F2 N3 O6

#### Compound ID Table

| Name | Formula            | Species | RT    | RT Diff | Mass     | Mass (Tgt) | ID Source | Score | Diff (ppm) | Score (MFG) |
|------|--------------------|---------|-------|---------|----------|------------|-----------|-------|------------|-------------|
|      | C27 H34 B F2 N3 O6 | (M+Na)+ | 0.138 |         | 544.2535 | 544.2545   | FBF       | 95.13 | -1.87      |             |

#### Compound Spectra (overlaid)

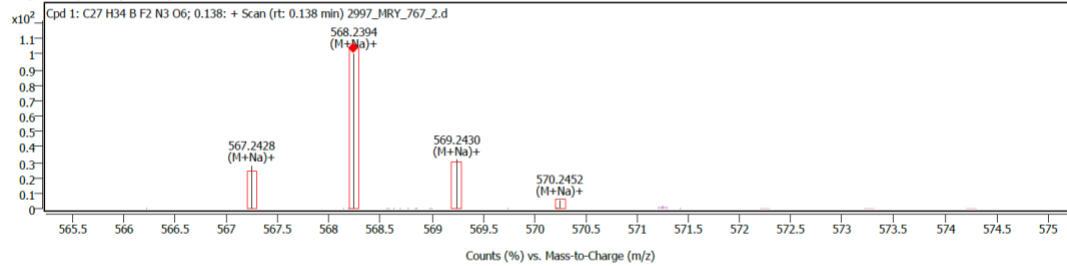

#### Spectrum Peaks

| m/z      | Z | m/z (Calc) | Diff (ppm) | Height % | Height % (Calc) | Ion Species | Formula       |
|----------|---|------------|------------|----------|-----------------|-------------|---------------|
| 567.2428 | 1 | 567.2437   | -1.65      | 27.72    | 23.07           | (M+Na)+     | C27H34BF2N3O6 |
| 568.2394 | 1 | 568.2406   | -2.08      | 100.00   | 100.00          | (M+Na)+     | C27H34BF2N3O6 |
| 569.2430 | 1 | 569.2436   | -1.01      | 31.62    | 30.06           | (M+Na)+     | C27H34BF2N3O6 |
| 570.2452 | 1 | 570.2462   | -1.80      | 5.21     | 5.63            | (M+Na)+     | C27H34BF2N3O6 |

MassHunter Qual 10.0  
(End of Report)

Fig S78. HRMS of compound 10c

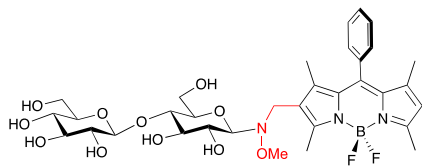

12

## Qualitative Compound Report

|                        |                         |                               |           |
|------------------------|-------------------------|-------------------------------|-----------|
| <b>Data File</b>       | 14587_DPS_138_A_01.d    | <b>Sample Name</b>            | DPS_138_A |
| <b>Sample Type</b>     | Sample                  | <b>Position</b>               | Vial 14   |
| <b>Instrument Name</b> | Instrument 1            | <b>User Name</b>              |           |
| <b>Acq Method</b>      | ESI_ACN_75_pos.m        | <b>IRM Calibration Status</b> | Success   |
| <b>DA Method</b>       | Defecto_modificado_CS.m | <b>Comment</b>                |           |

### Compound Table

| Compound Label             | RT    | Mass      | Abund | Formula             | Tgt Mass  | Diff (ppm) |
|----------------------------|-------|-----------|-------|---------------------|-----------|------------|
| Cpd 1: C33 H44 B F2 N3 O11 | 0.604 | 706.30784 | 3383  | C33 H44 B F2 N3 O11 | 706.30733 | 0.73       |

| Compound Label             | RT    | Algorithm       | Mass      |
|----------------------------|-------|-----------------|-----------|
| Cpd 1: C33 H44 B F2 N3 O11 | 0.604 | Find By Formula | 706.30784 |

MS Zoomed Spectrum

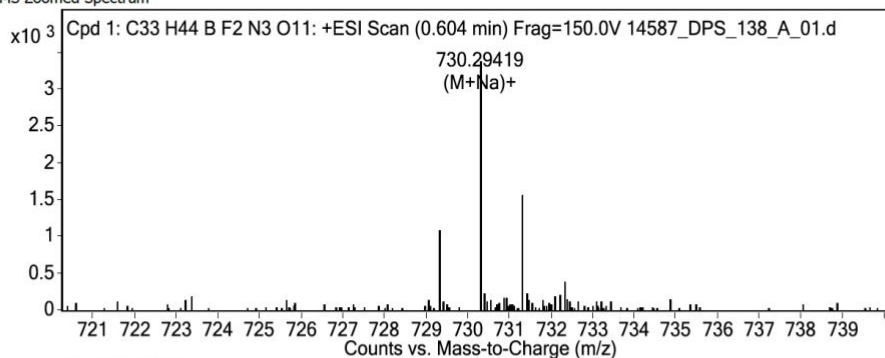

### MS Spectrum Peak List

| m/z       | Calc m/z  | Diff(ppm) | z | Abund | Formula                | Ion     |
|-----------|-----------|-----------|---|-------|------------------------|---------|
| 158.9631  |           |           |   | 10668 |                        |         |
| 159.01657 |           |           |   | 393   |                        |         |
| 159.07943 |           |           |   | 386   |                        |         |
| 159.1902  |           |           |   | 161   |                        |         |
| 159.96781 |           |           |   | 243   |                        |         |
| 162.90782 |           |           |   | 222   |                        |         |
| 163.13597 |           |           |   | 171   |                        |         |
| 730.29419 | 730.2935  | 0.93      | 1 | 3383  | C33 H44 B F2 N3 Na O11 | (M+Na)+ |
| 731.2954  | 731.2965  | -1.5      | 1 | 1574  | C33 H44 B F2 N3 Na O11 | (M+Na)+ |
| 732.29765 | 732.29909 | -1.96     | 1 | 404   | C33 H44 B F2 N3 Na O11 | (M+Na)+ |

--- End Of Report ---

Fig S79. HRMS of compound 12

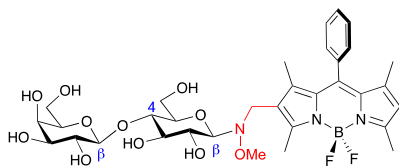

13

## Qualitative Compound Report

|                        |                         |                               |           |
|------------------------|-------------------------|-------------------------------|-----------|
| <b>Data File</b>       | 14451_DPS_132_A_01.d    | <b>Sample Name</b>            | DPS_132_A |
| <b>Sample Type</b>     | Sample                  | <b>Position</b>               | Vial 2    |
| <b>Instrument Name</b> | Instrument 1            | <b>User Name</b>              |           |
| <b>Acq Method</b>      | ESI_ACN_75_pos.m        | <b>IRM Calibration Status</b> | Success   |
| <b>DA Method</b>       | Defecto_modificado_CS.m | <b>Comment</b>                |           |

### Compound Table

| Compound Label             | RT    | Mass      | Abund | Formula             | Tgt Mass  | Diff (ppm) |
|----------------------------|-------|-----------|-------|---------------------|-----------|------------|
| Cpd 1: C33 H44 B F2 N3 O11 | 0.542 | 706.30868 | 1720  | C33 H44 B F2 N3 O11 | 706.30733 | 1.92       |

| Compound Label             | RT    | Algorithm       | Mass      |
|----------------------------|-------|-----------------|-----------|
| Cpd 1: C33 H44 B F2 N3 O11 | 0.542 | Find By Formula | 706.30868 |

MS Zoomed Spectrum

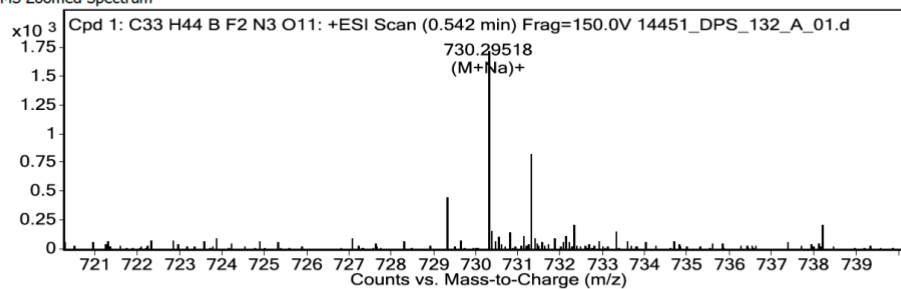

### MS Spectrum Peak List

| m/z       | Calc m/z  | Diff(ppm) | z | Abund | Formula                | Ion     |
|-----------|-----------|-----------|---|-------|------------------------|---------|
| 100.07583 |           |           |   | 2406  |                        |         |
| 100.1131  |           |           |   | 236   |                        |         |
| 101.07046 |           |           |   | 1643  |                        |         |
| 102.12783 |           |           |   | 9477  |                        |         |
| 102.17523 |           |           |   | 287   |                        |         |
| 102.21944 |           |           |   | 268   |                        |         |
| 102.24769 |           |           |   | 166   |                        |         |
| 103.13382 |           |           |   | 634   |                        |         |
| 103.95695 |           |           |   | 163   |                        |         |
| 730.29518 | 730.2935  | 2.29      | 1 | 1720  | C33 H44 B F2 N3 Na O11 | (M+Na)+ |
| 731.29504 | 731.2965  | -1.99     | 1 | 830   | C33 H44 B F2 N3 Na O11 | (M+Na)+ |
| 732.29827 | 732.29909 | -1.12     | 1 | 215   | C33 H44 B F2 N3 Na O11 | (M+Na)+ |

--- End Of Report ---

Fig S80. HRMS of compound 13

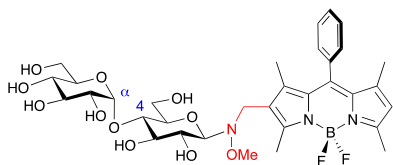

14

## Qualitative Compound Report

|                        |                         |                               |           |
|------------------------|-------------------------|-------------------------------|-----------|
| <b>Data File</b>       | 14541_DPS_135_A_01.d    | <b>Sample Name</b>            | DPS_135_A |
| <b>Sample Type</b>     | Sample                  | <b>Position</b>               | Vial 12   |
| <b>Instrument Name</b> | Instrument 1            | <b>User Name</b>              |           |
| <b>Acq Method</b>      | ESI_ACN_75_pos.m        | <b>IRM Calibration Status</b> | Success   |
| <b>DA Method</b>       | Defecto_modificado_CS.m | <b>Comment</b>                |           |

### Compound Table

| Compound Label             | RT    | Mass      | Abund | Formula             | Tgt Mass  | Diff (ppm) |
|----------------------------|-------|-----------|-------|---------------------|-----------|------------|
| Cpd 1: C33 H44 B F2 N3 O11 | 0.424 | 706.30966 | 2238  | C33 H44 B F2 N3 O11 | 706.30733 | 3.31       |

| Compound Label             | RT    | Algorithm       | Mass      |
|----------------------------|-------|-----------------|-----------|
| Cpd 1: C33 H44 B F2 N3 O11 | 0.424 | Find By Formula | 706.30966 |

MS Zoomed Spectrum

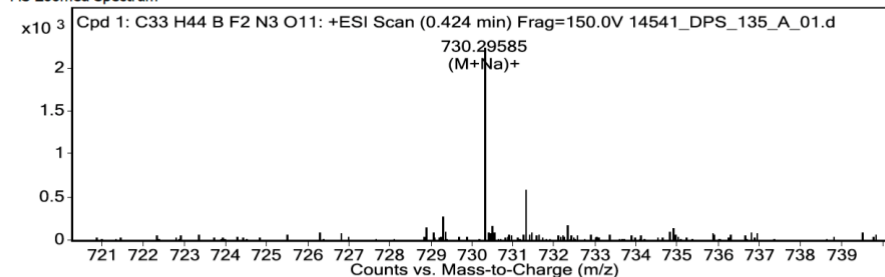

### MS Spectrum Peak List

| m/z       | Calc m/z | Diff (ppm) | z | Abund | Formula                | Ion     |
|-----------|----------|------------|---|-------|------------------------|---------|
| 98.09916  |          |            |   | 204   |                        |         |
| 100.07629 |          |            |   | 1890  |                        |         |
| 101.07103 |          |            |   | 1064  |                        |         |
| 102.12784 |          |            |   | 15080 |                        |         |
| 102.17205 |          |            |   | 516   |                        |         |
| 102.22228 |          |            |   | 539   |                        |         |
| 103.1331  |          |            |   | 1090  |                        |         |
| 104.10845 |          |            |   | 202   |                        |         |
| 730.29585 | 730.2935 | 3.22       | 1 | 2238  | C33 H44 B F2 N3 Na O11 | (M+Na)+ |
| 731.29835 | 731.2965 | 2.53       | 1 | 596   | C33 H44 B F2 N3 Na O11 | (M+Na)+ |

--- End Of Report ---

Fig S81. HRMS of compound 14

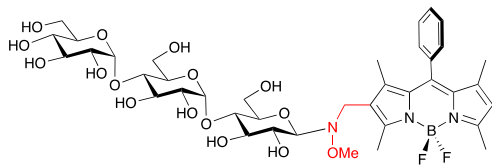

15

## Qualitative Compound Report

|                               |                      |                      |                                    |
|-------------------------------|----------------------|----------------------|------------------------------------|
| <b>Data File</b>              | 74_DPS-166A_01.d     | <b>Sample Name</b>   | DPS-166A                           |
| <b>Sample Type</b>            | Sample               | <b>Position</b>      | Vial 10                            |
| <b>Instrument Name</b>        | Instrument 1         | <b>User Name</b>     |                                    |
| <b>Acq Method</b>             | ESI_ACN_75_pos_new.m | <b>Acquired Time</b> | 12/17/2020 11:37:15 AM (UTC+01:00) |
| <b>IRM Calibration Status</b> | Success              | <b>DA Method</b>     | Defecto_modificado.m               |
| <b>Comment</b>                |                      |                      |                                    |

|                                 |                                    |                               |                                                         |
|---------------------------------|------------------------------------|-------------------------------|---------------------------------------------------------|
| <b>Sample Group</b>             |                                    | <b>Info.</b>                  |                                                         |
| <b>User</b>                     | DIEGO POZAS                        | <b>Stream Name</b>            | LC 1                                                    |
| <b>Acquisition Time (Local)</b> | 12/17/2020 11:37:15 AM (UTC+01:00) | <b>Acquisition SW Version</b> | 6200 series TOF/6500 series Q-TOF B.08.00 (B8058.3 SP1) |
| <b>QTOF Driver Version</b>      | 8.00.00                            | <b>QTOF Firmware Version</b>  | 2.712                                                   |
| <b>Tune Mass Range Max.</b>     | 1700                               |                               |                                                         |

### Compound Table

| Compound Label                       | RT    | Mass     | Abund | Formula             | Tgt Mass | Diff (ppm) | Hits (DB) |
|--------------------------------------|-------|----------|-------|---------------------|----------|------------|-----------|
| Cpd 1: C39 H54 B F2 N3 O16; 337.1690 | 0.204 | 868.3604 | 81890 | C39 H54 B F2 N3 O16 | 868.3602 | 0.33       | 1         |

| Compound Label                       | m/z      | RT    | Algorithm       | Mass     |
|--------------------------------------|----------|-------|-----------------|----------|
| Cpd 1: C39 H54 B F2 N3 O16; 337.1690 | 892.3463 | 0.204 | Find by Formula | 868.3604 |

### MS Zoomed Spectrum

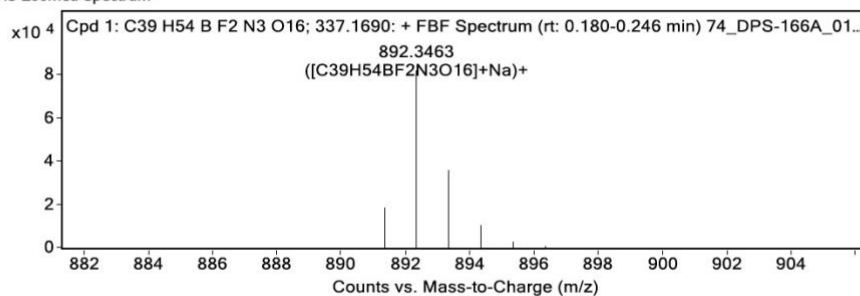

### MS Spectrum Peak List

| m/z      | z | Abund    | Formula        | Ion     |
|----------|---|----------|----------------|---------|
| 891.3499 | 1 | 18393.52 | C39H54BF2N3O16 | (M+Na)+ |
| 892.3463 | 1 | 81890.46 | C39H54BF2N3O16 | (M+Na)+ |
| 893.3494 | 1 | 35717.1  | C39H54BF2N3O16 | (M+Na)+ |
| 894.3533 | 1 | 10226.35 | C39H54BF2N3O16 | (M+Na)+ |
| 895.3635 | 1 | 2691.77  | C39H54BF2N3O16 | (M+Na)+ |
| 896.3622 | 1 | 546.8    | C39H54BF2N3O16 | (M+Na)+ |

MS Zoomed Spectrum

Fig S82. HRMS of compound 15



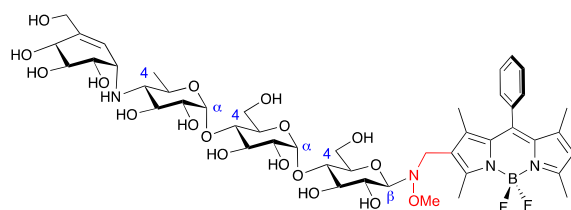

16

## Qualitative Compound Report

|                        |                         |                               |          |
|------------------------|-------------------------|-------------------------------|----------|
| <b>Data File</b>       | 14744_DPS_149A_01.d     | <b>Sample Name</b>            | DPS_149A |
| <b>Sample Type</b>     | Sample                  | <b>Position</b>               | Vial 1   |
| <b>Instrument Name</b> | Instrument 1            | <b>User Name</b>              |          |
| <b>Acq Method</b>      | ESI_ACN_75_pos.m        | <b>IRM Calibration Status</b> | Success  |
| <b>DA Method</b>       | Defecto_modificado_CS.m | <b>Comment</b>                |          |

### Compound Table

| Compound Label             | RT   | Mass       | Abund | Formula             | Tgt Mass   | Diff (ppm) |
|----------------------------|------|------------|-------|---------------------|------------|------------|
| Cpd 1: C48 H67 B F2 N4 O19 | 0.25 | 1051.45356 | 3691  | C48 H67 B F2 N4 O19 | 1051.44969 | 3.67       |

| Compound Label             | RT   | Algorithm       | Mass       |
|----------------------------|------|-----------------|------------|
| Cpd 1: C48 H67 B F2 N4 O19 | 0.25 | Find By Formula | 1051.45356 |

MS Zoomed Spectrum

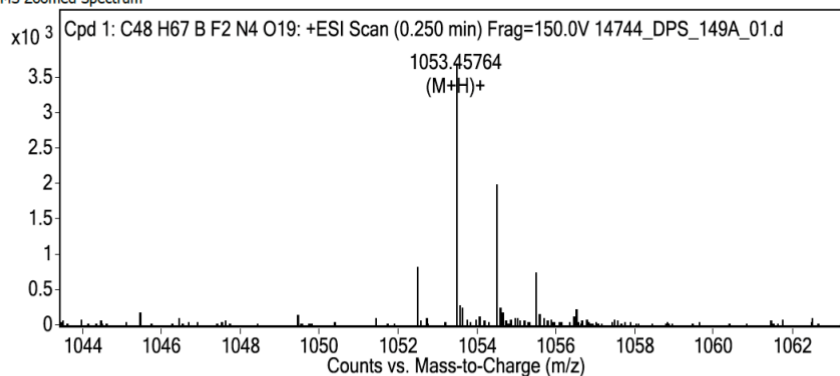

### MS Spectrum Peak List

| m/z        | Calc m/z   | Diff(ppm) | z | Abund | Formula             | Ion    |
|------------|------------|-----------|---|-------|---------------------|--------|
| 1010.44915 |            |           |   | 10192 |                     |        |
| 1011.4473  |            |           |   | 50705 |                     |        |
| 1011.54057 |            |           |   | 2682  |                     |        |
| 1011.60956 |            |           |   | 1735  |                     |        |
| 1012.45106 |            |           |   | 26105 |                     |        |
| 1012.53788 |            |           |   | 2176  |                     |        |
| 1013.4542  |            |           |   | 6838  |                     |        |
| 1014.45274 |            |           |   | 2435  |                     |        |
| 1053.45764 | 1053.45416 | 3.3       | 1 | 3691  | C48 H68 B F2 N4 O19 | (M+H)+ |
| 1054.46352 | 1054.45708 | 6.11      | 1 | 1999  | C48 H68 B F2 N4 O19 | (M+H)+ |

--- End Of Report ---

Fig S83. HRMS of compound 16

## 6. X-Ray diffraction

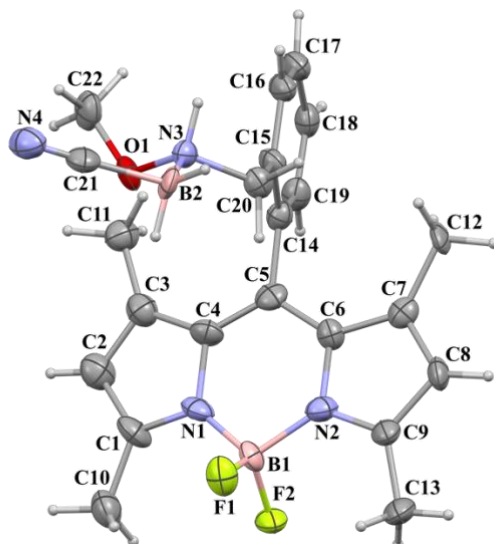

**Figure S84.** The molecular structure of compound **6d** showing the atom-labelling scheme and displacement ellipsoids at the 50% probability level for non-H atoms and fixed-size spheres of radius 0.1angstrom for hydrogen atoms.

## 7. Photophysical data

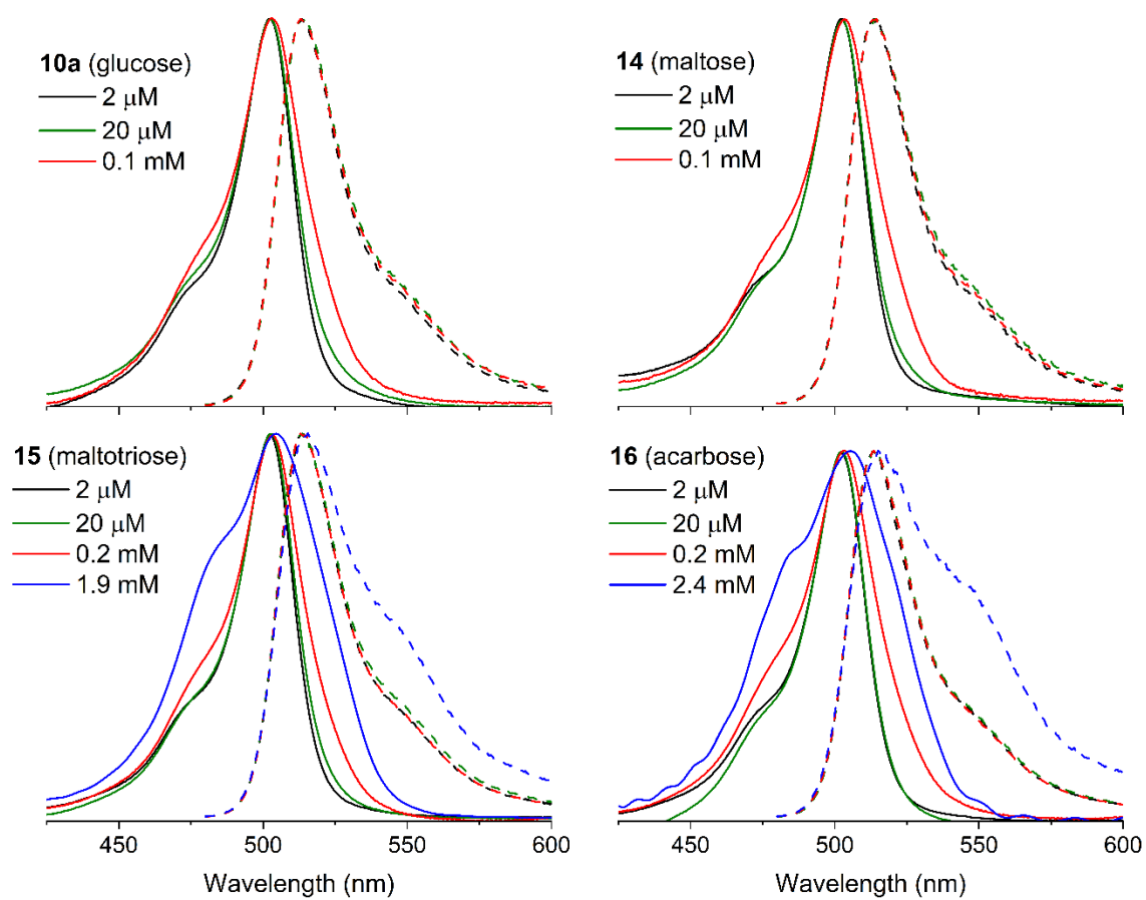

**Figure S85.** Normalized absorption (solid line) and fluorescence (dashed line) spectra of BODIPY glycoconjugates with different number of carbohydrate units respectively, as a function of the dye concentration in water using optically matched solutions.

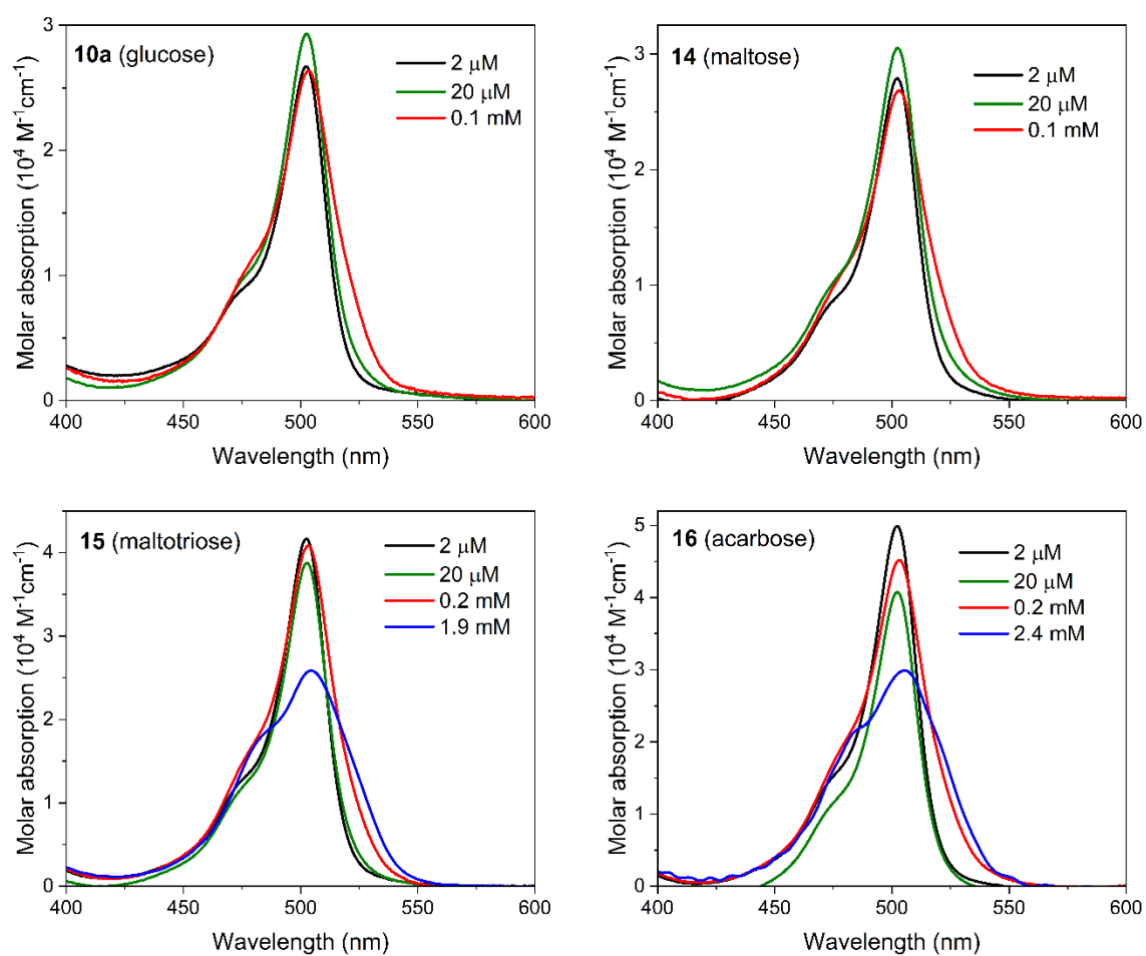

**Figure S86.** Absorption spectra (scaled by their respective molar absorption coefficients) of the BODIPY glycoconjugates at different dye concentrations in pure water.

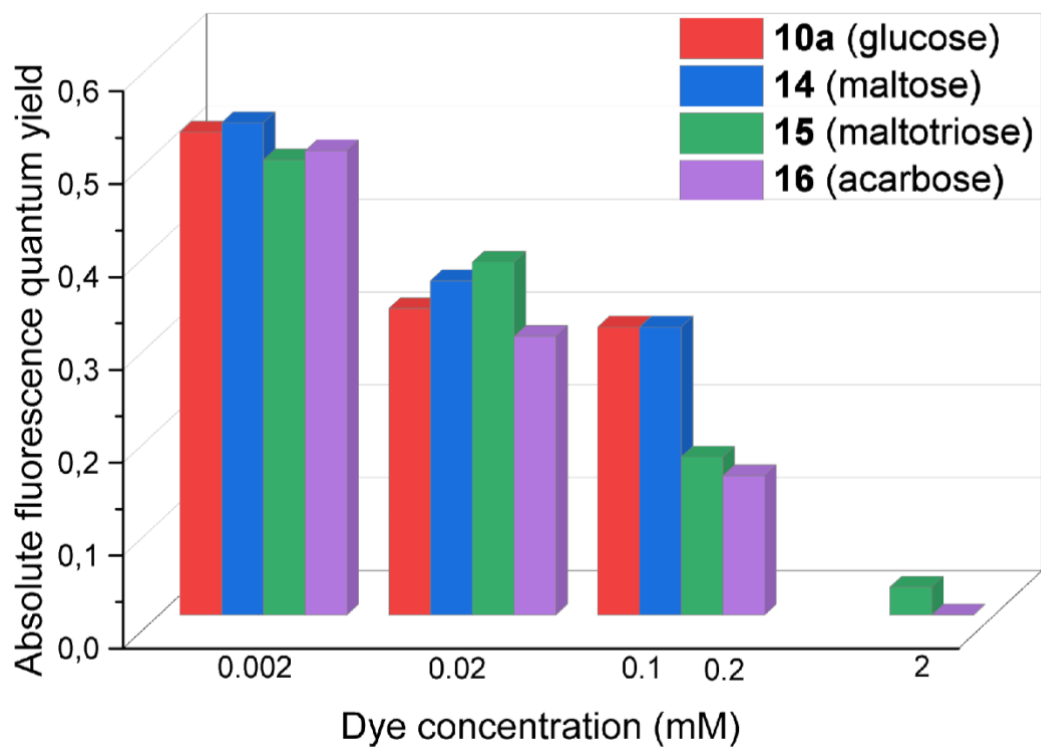

**Figure S87.** Evolution of the absolute fluorescence quantum yield with the dye concentration in pure water.

## 8. Full-size versions of confocal images

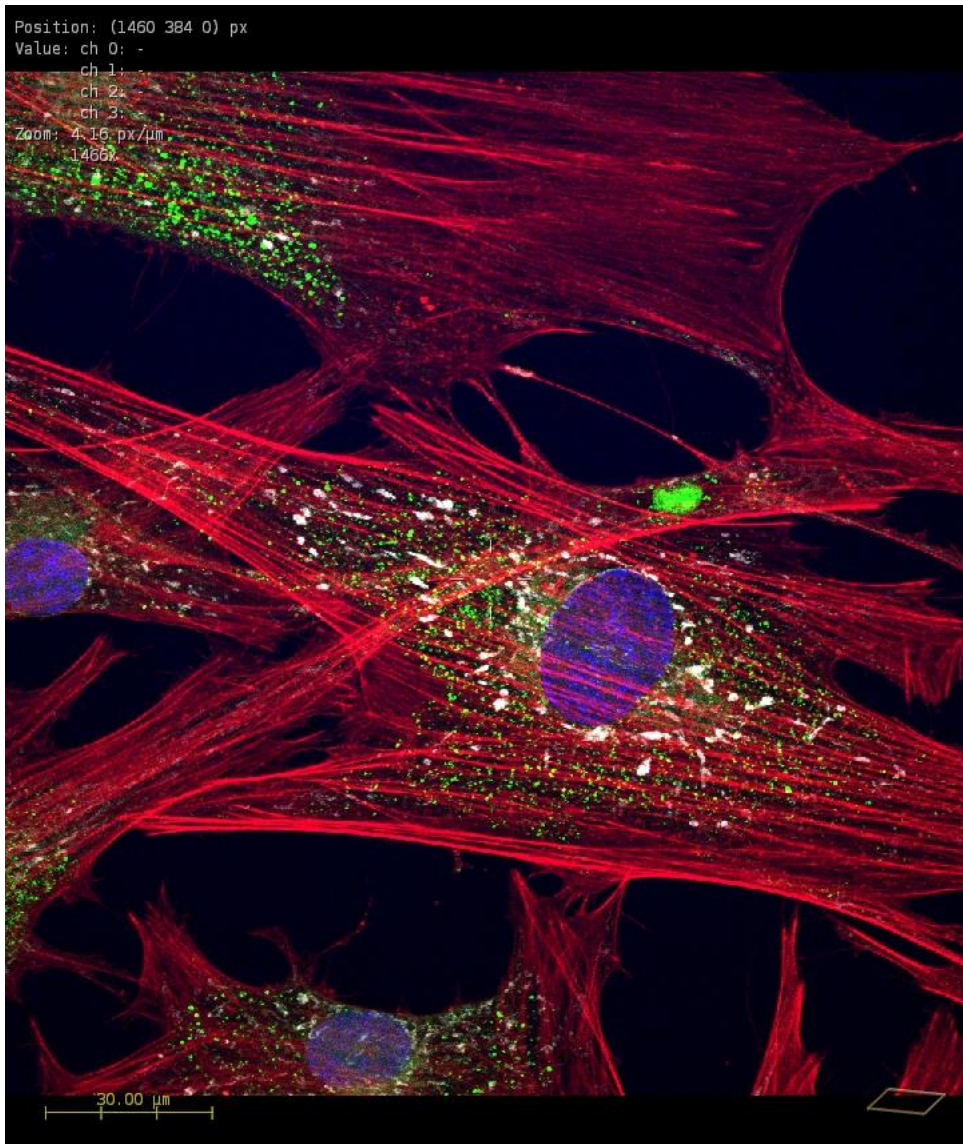

**Figure S88.** Confocal imaging of mitochondria (light blue), nucleus (blue), actin (red) stain and BODIPY internalization (green). Scale bar: 30 µm



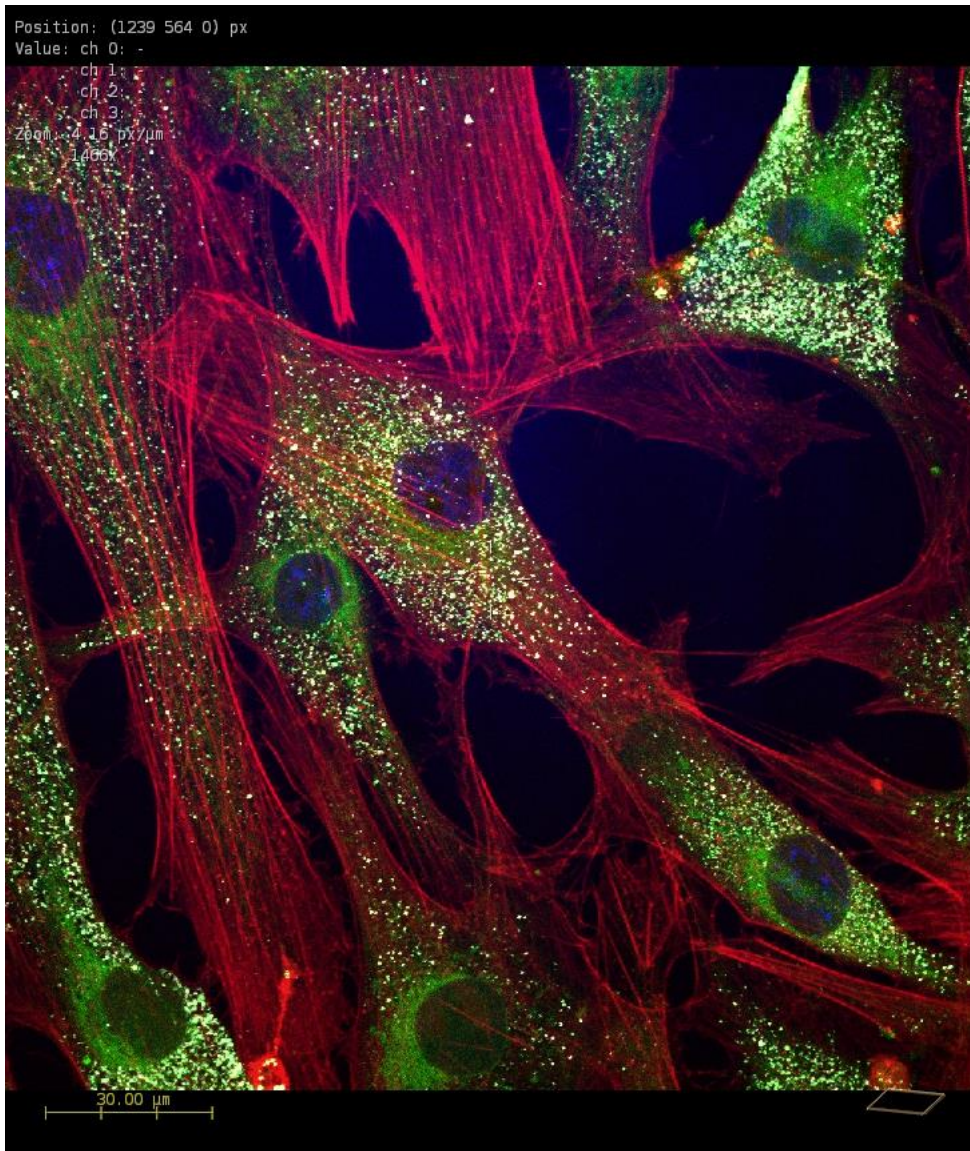

**Figure S89.** Confocal imaging of lysosomes (light blue), nucleus (blue), actin (red) stain and BODIPY internalization (green). Scale bar: 30  $\mu$ m

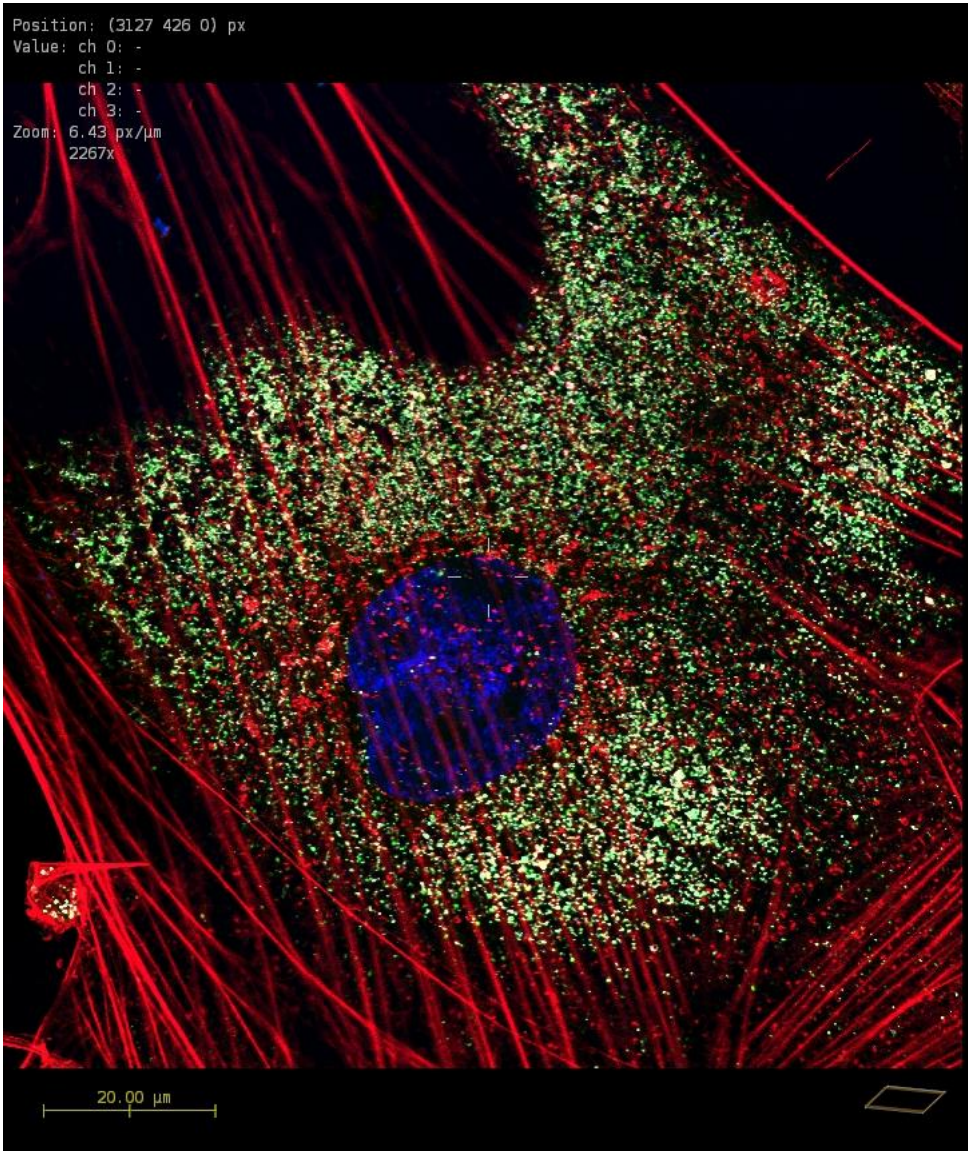

**Figure S90.** Lightning image of the lysosomes (red) and BODIPY (green). Scale bar: 20  $\mu\text{m}$
